# Supplementary material for: DNAm-based signatures of accelerated aging and mortality in blood are associated with low renal function
Source: PubMed Central journal article supplement (PMC8170969; doi:10.1186/s13148-021-01082-w), 2021-06-02

DNAmAge acceleration and renal function

Suppl. Figures

Suppl. Figure 1. Odds Ratios from DNAm predictors and binary kidney traits

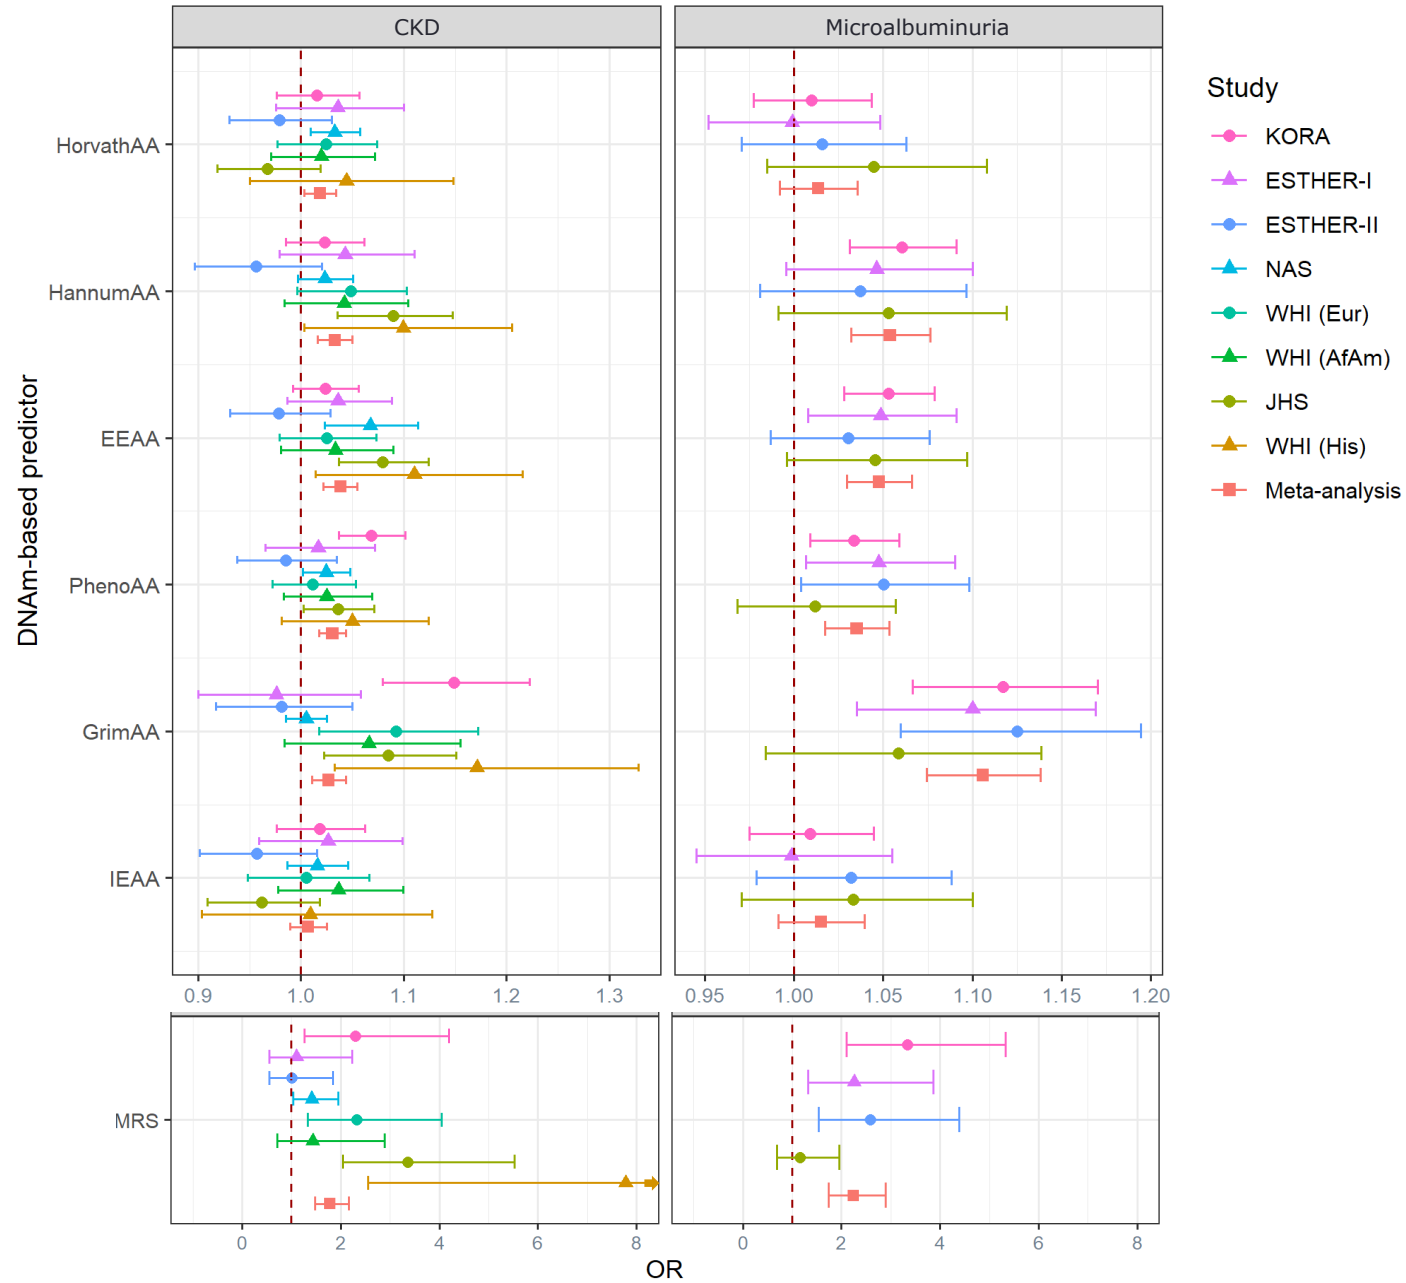

## Suppl. Figure 2. Forest plots of associations with eGFR and CKD

A.

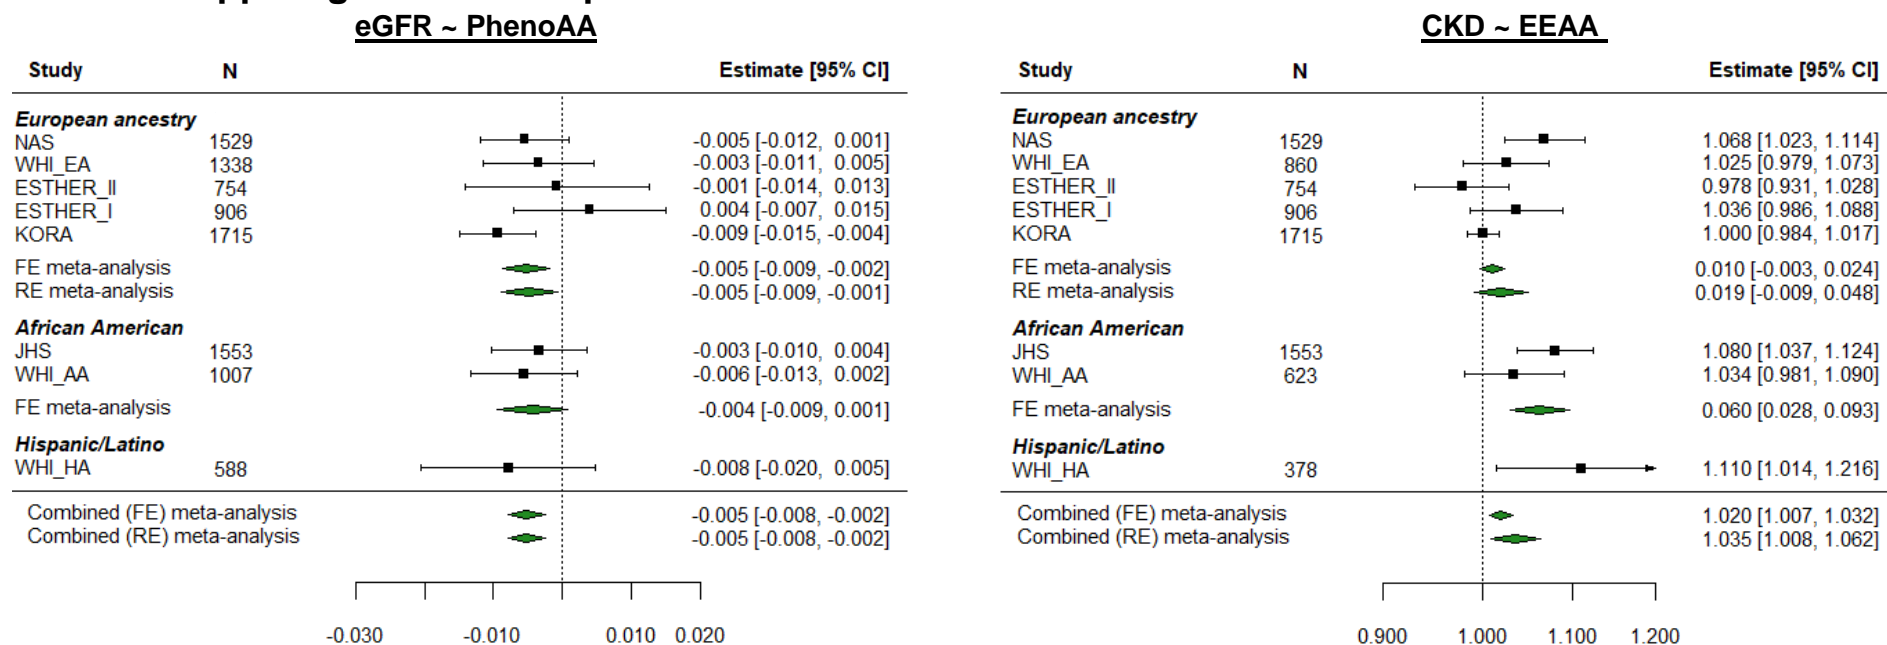

B.

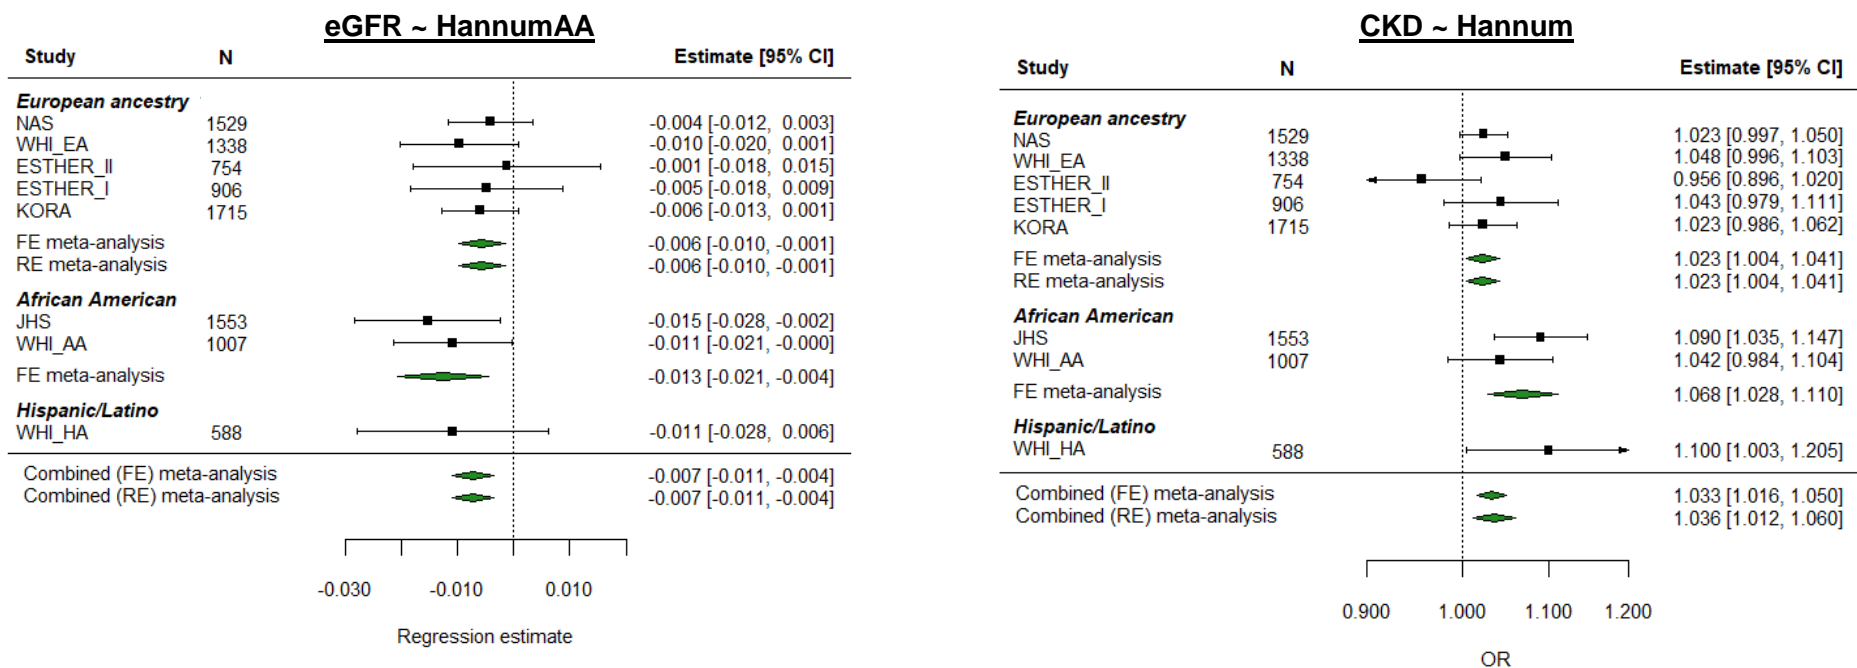

C.

eGFR ~ Horvath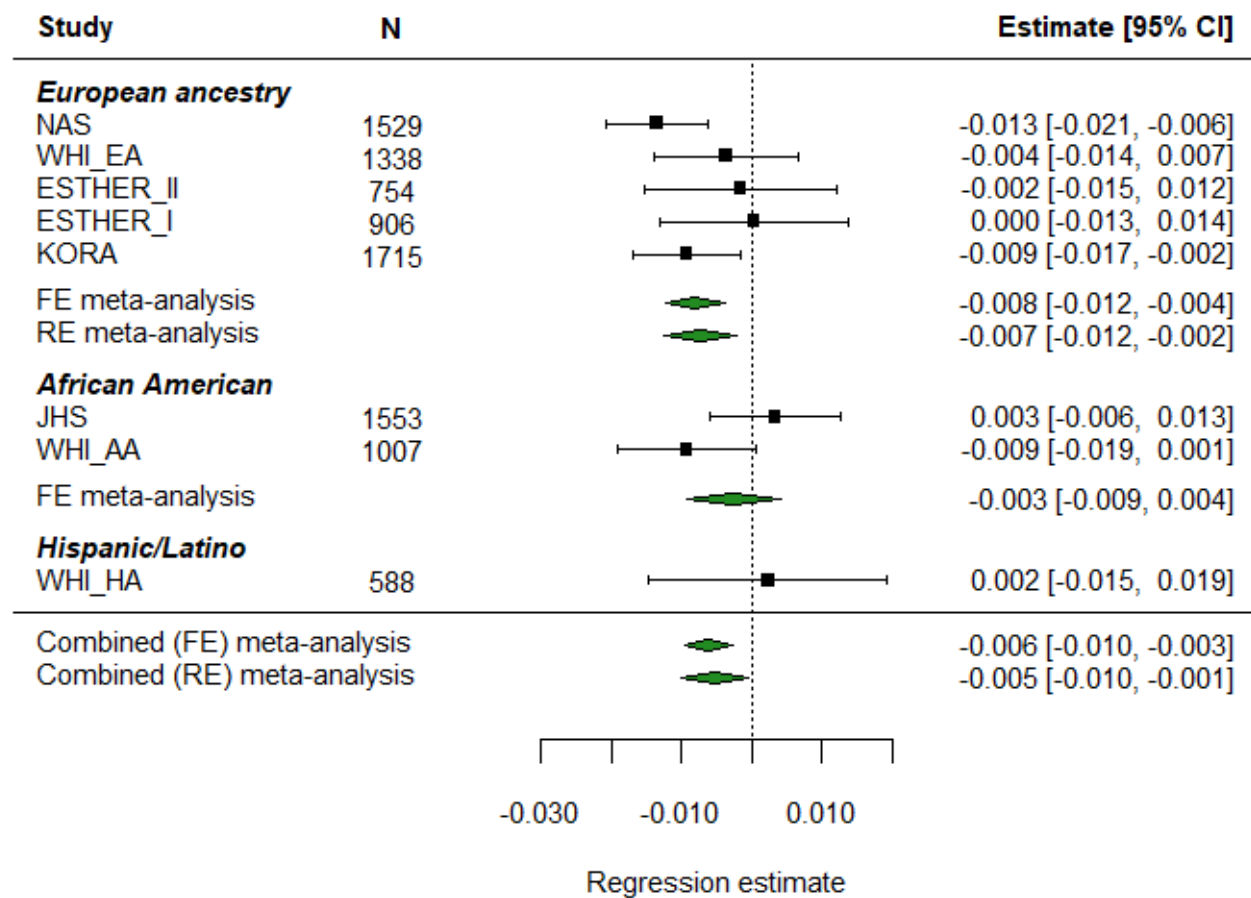

## Suppl. Figure 3. Forest plots of associations with uACR

A.

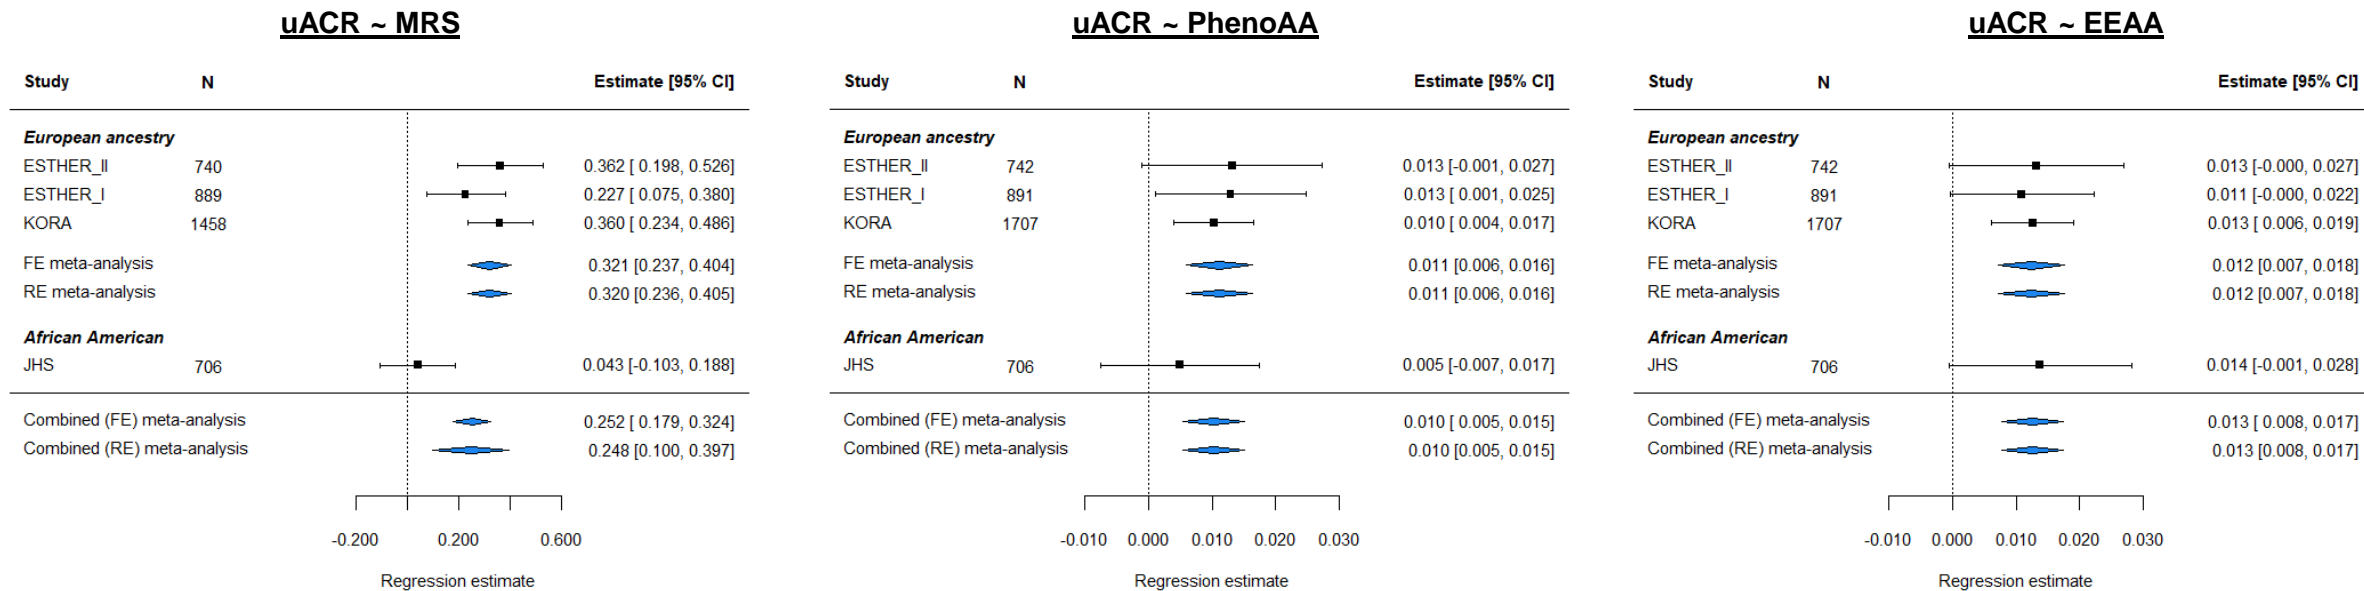

B.

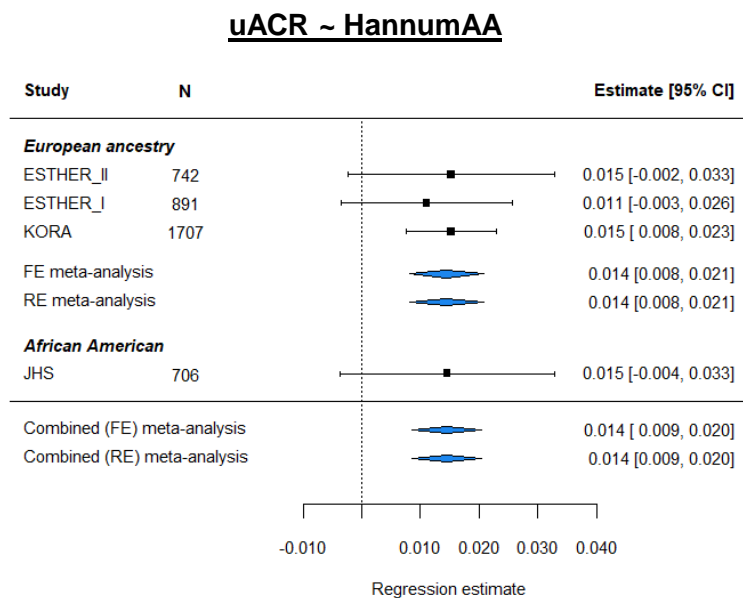

C.

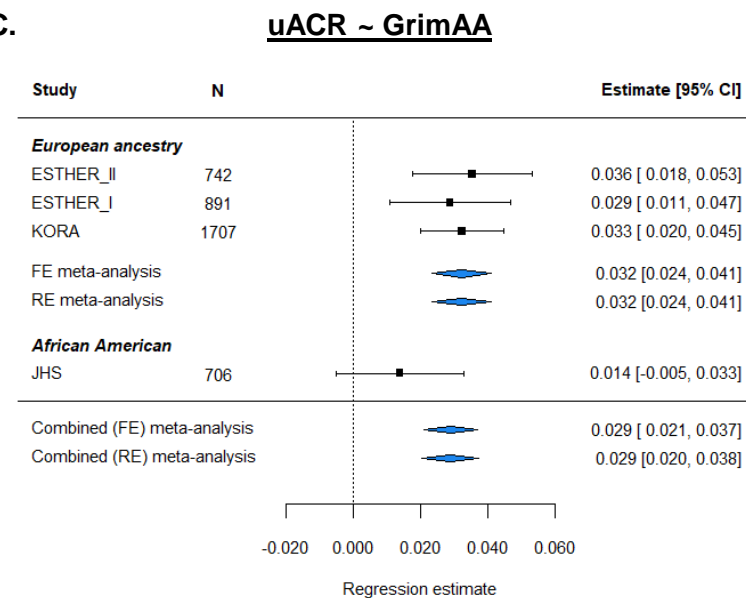

## Suppl. Figure 4. Forest plots of associations with microalbuminuria

A.

### microalbuminuria ~ MRS

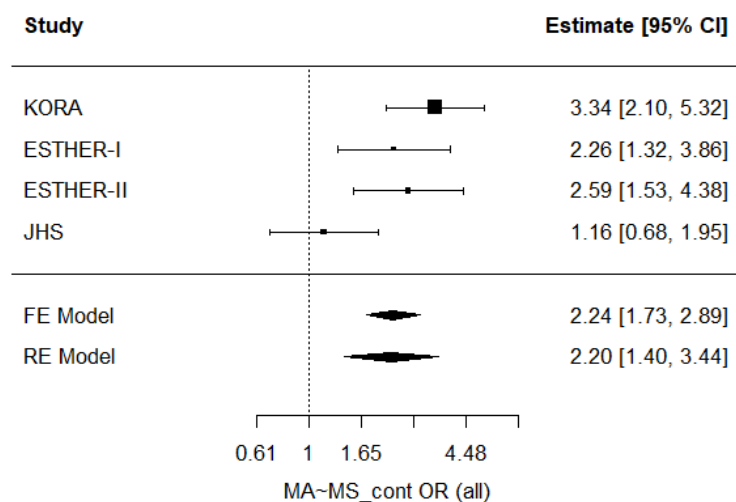

### microalbuminuria ~ PhenoAA

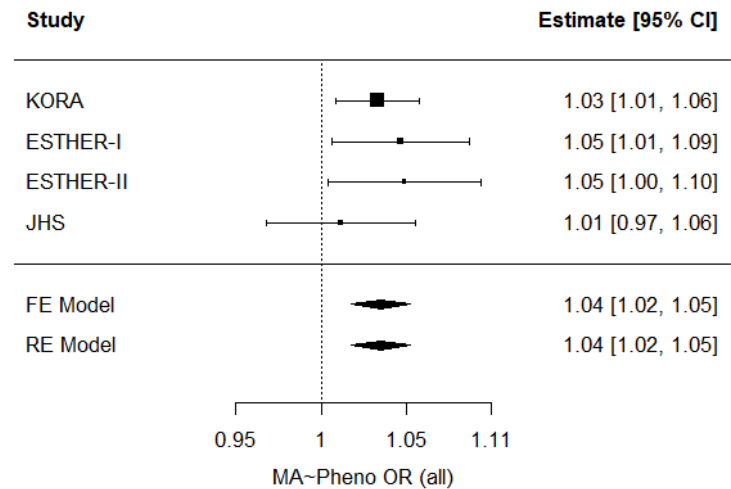

### microalbuminuria ~ EEAA

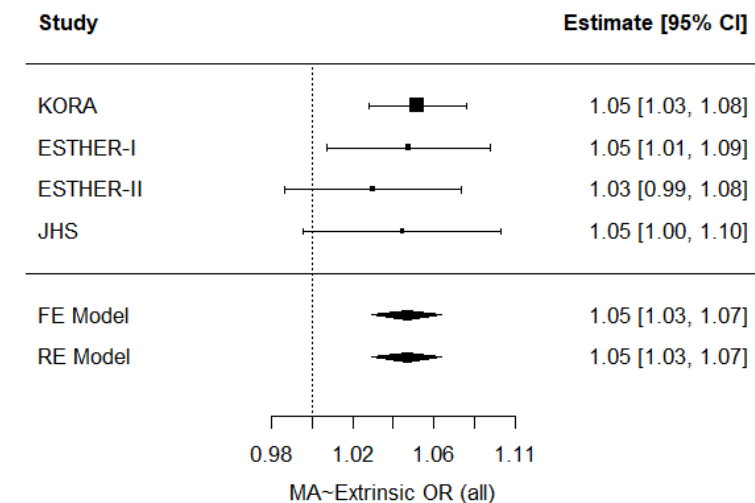

B.

### microalbuminuria ~ HannumAA

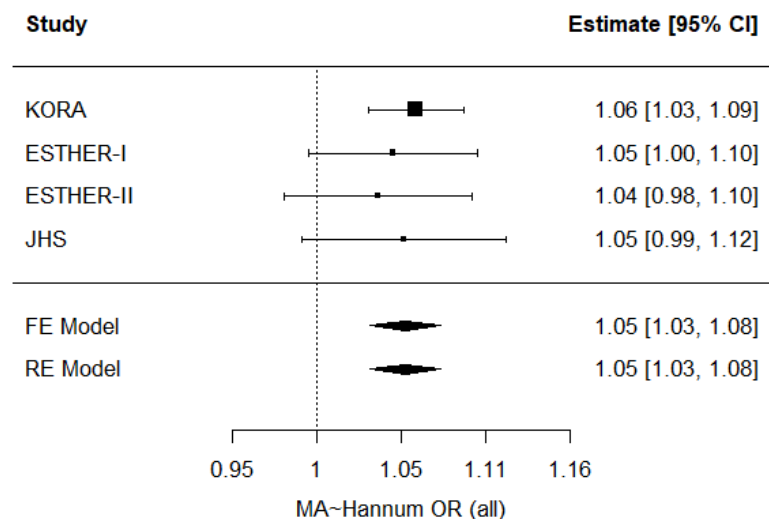

C.

### microalbuminuria ~ GrimAA

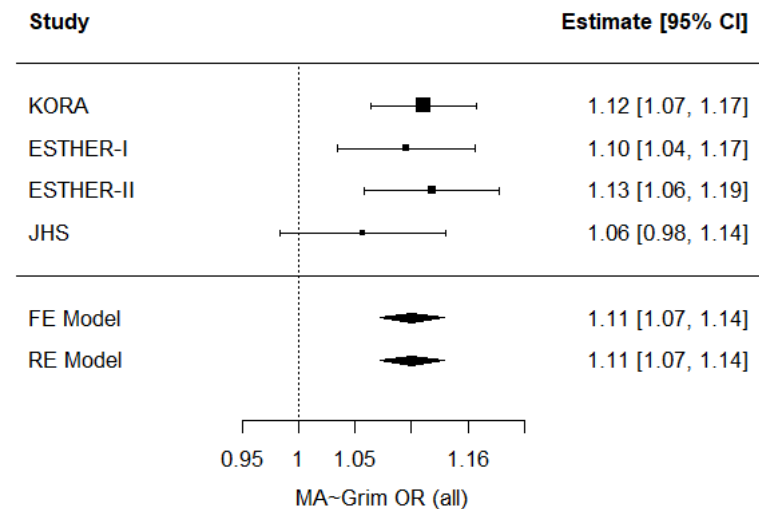

Suppl. Figure 5. Forest plots of associations with urate

A.

urate ~ EEAA

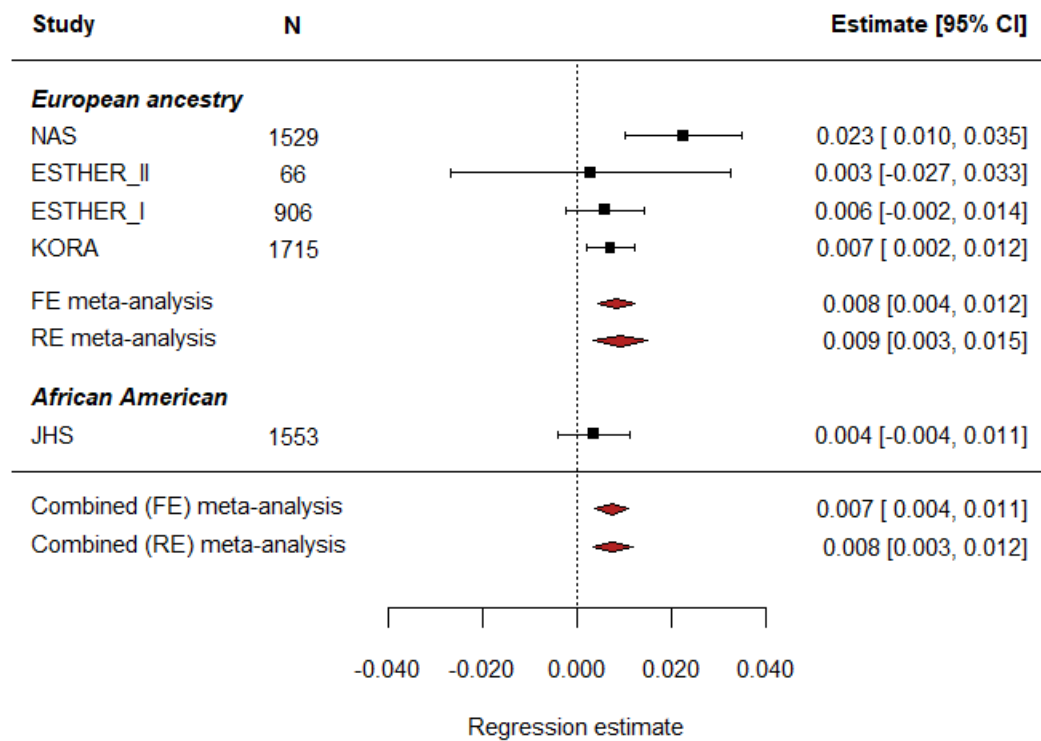

B.

urate ~ GrimAA

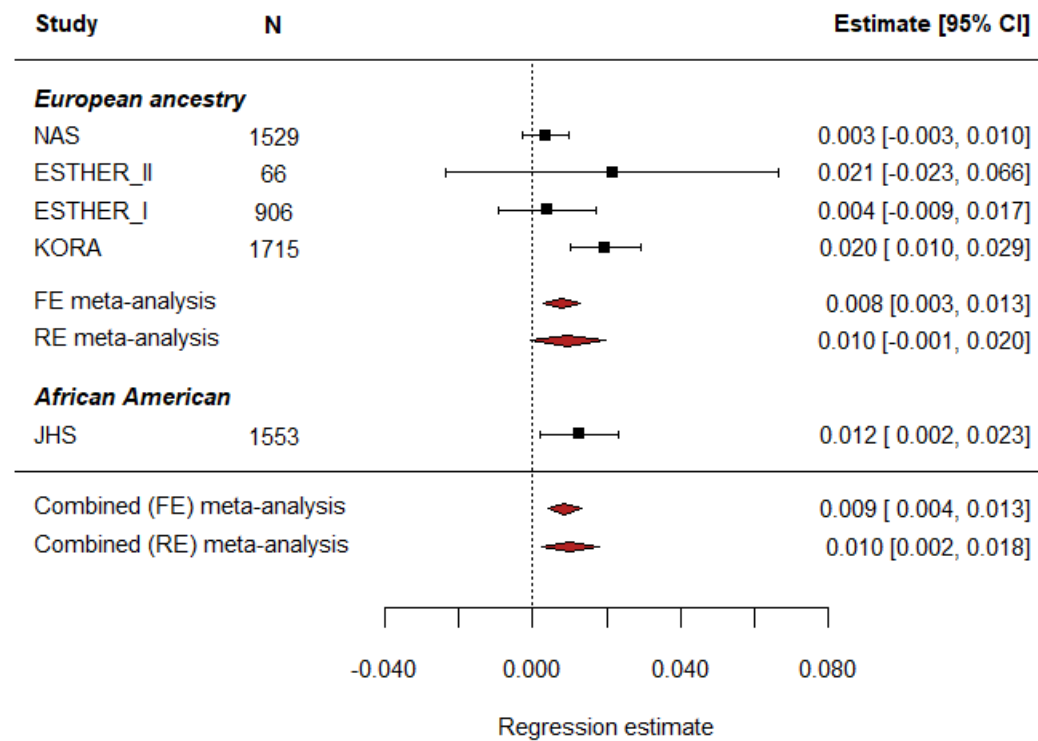

Suppl. Figure 6. Forest plots for secondary associations with uACR and serum urate

A.

uACR ~ MRS high risk

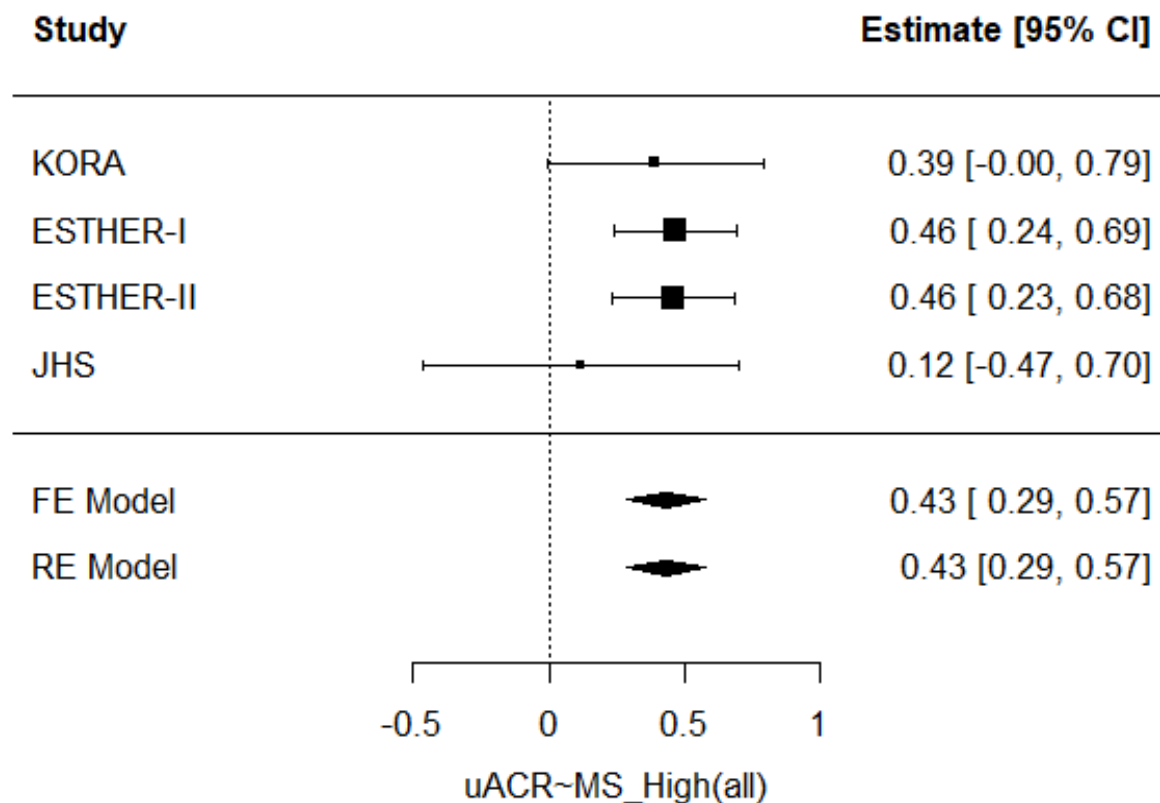

B.

Serum urate ~ MRS moderate risk

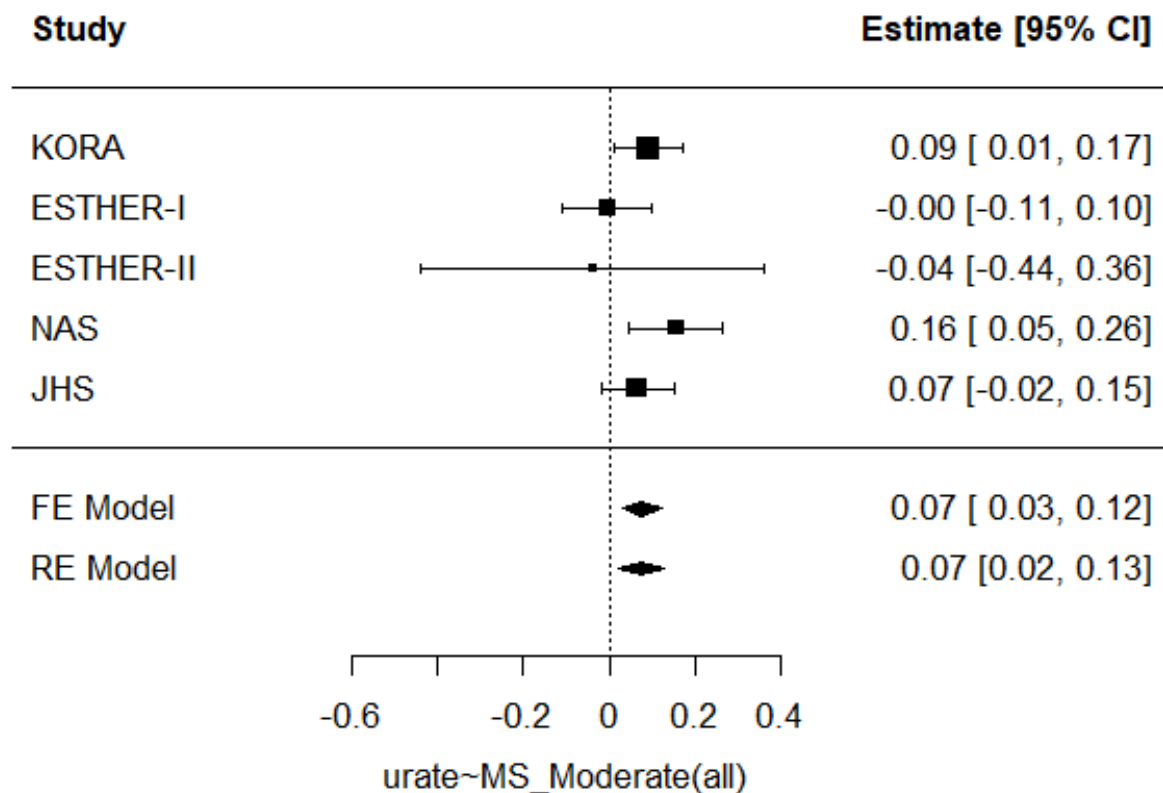



Suppl. Figure 7. Effect estimates from MRS and renal traits

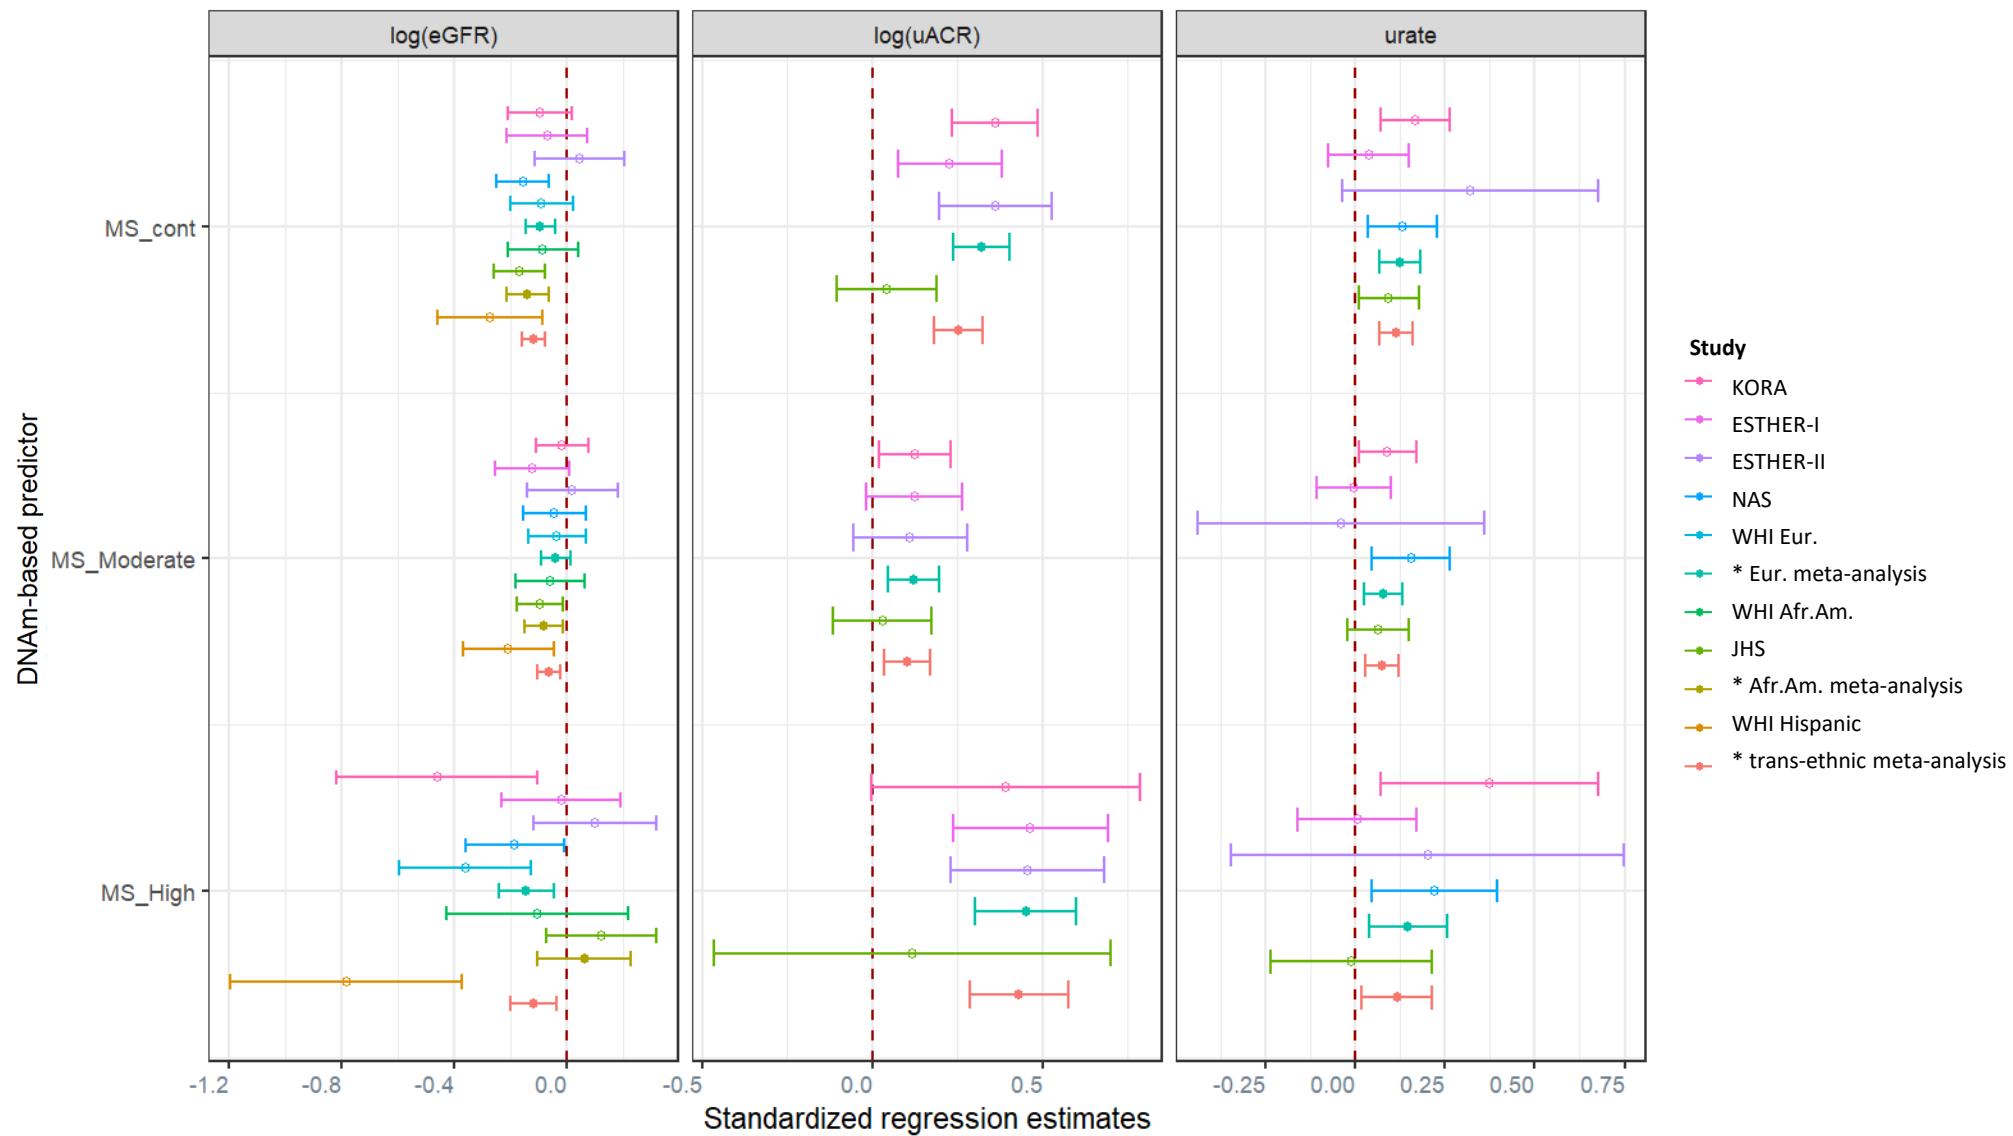

Supplement: 13148_2021_1082_MOESM2_ESM.pdf [file 13148_2021_1082_MOESM2_ESM.pdf]
