# Supplementary material for: DNAm-based signatures of accelerated aging and mortality in blood are associated with low renal function
Source: Clin Epigenetics. 2021 Jun 2;13:121. doi: 10.1186/s13148-021-01082-w (PMC8170969; doi:10.1186/s13148-021-01082-w)
Supplement: Supplementary file 1 — Additional file 1: Tables S1–S5 showing the results from all conducted analyses across renal parameters and DNAm-based predictors, providing both estimates from individual studies and meta-analyses. [file 13148_2021_1082_MOESM1_ESM.xlsx]

## Sheet: TOC
	Epigenetic measures of accelerated aging and mortality in blood are associated with low renal function
	Table of Contents
	Additional file 1: Table S1. Population characteristics of participating studies, extended
	Additional file 1: Table S2. Study-level regression results for all kidney traits
	Additional file 1: Table S3. Results from meta-analyses of fully-adjusted model
	Additional file 1: Table S4. Standardized study-level and meta-analysis results
	Additional file 1: Table S5. Meta-analysis of associations between kidney and DNAm GrimAgeAccel traits

## Sheet: ST1
	Additional file 1: Table S1. Population characteristics of participating studies, extended
	Traits	KORA	ESTHER (subsetI)	ESTHER (subsetII)	JHS	NAS	WHI - AA	WHI - H	WHI - EA
	N	1725	906	754	1746	1529	1041	607	1449
	Epigenetic clocks
	HorvathAgeAccel, mean (SD)	-5.51 (5.44)	1.81 (4.80)	4.44 (5.33)	-4.15 (5.43)	-1.09 (7.32)	-0.76 (5.80)	-1.35 (4.64)	-1.73 (5.17)
	HannumAgeAccel, mean (SD)	9.61 (6.02)	6.57 (4.63)	5.36 (4.39)	-13.49 (4.85)	3.80 (6.26)	1.98 (5.30)	3.84 (4.59)	2.31 (4.81)
	IEAA, mean (SD)	-0.01 (5.12)	-0.00 (4.08)	-0.04 (4.54)	-4.15 (5.43)	-0.28 (6.13)	0.05 (5.61)	-1.06 (4.36)	0.42 (4.78)
	EEAA, mean (SD)	10.38 (7.15)	5.98 (5.78)	4.42 (5.47)	0.002 (5.34)	5.64 (7.20)	-1.36 (6.94)	2.01 (5.83)	0.04 (6.11)
	PhenoAgeAccel, mean (SD)	-7.99 (7.22)	-7.38 (5.57)	-6.70 (5.33)	-12.42 (6.32)	-4.46 (7.52)	-6.72 (7.43)	-6.72 (6.30)	-8.23 (6.62)
	GrimAgeAccel, mean (SD)	1.14 (4.99)	5.61 (5.39)	6.74 (5.71)	0.63 (5.59)	-5.53 (4.31)	-0.48 (4.74)	-1.57 (3.90)	-3.20 (4.50)
	DNAmADM, mean (SD)	340.54 (25.39)	20.76 (14.47)	24.43 (14.77)	325.71 (26.78)	331.86 (17.15)	345.54 (18.49)	348.01 (19.64)	355.31 (18.08)
	DNAmB2M, mean (SD)	1588886.73 (155093.44)	430.70 (15.58)	431.56 (15.61)	1581303.07 (225515.89)	1844825.06 (130534.89)	1677418.81 (150233.60)	1654743.10 (120175.12)	1711161.99 (124075.39)
	DNAmCystatinC, mean (SD)	608348.96 (37753.44)	1618698.50 (112755.09)	1655714.43 (119786.38)	569638.17 (46000.77)	618980.87 (31939.72)	612257.72 (41874.07)	616148.66 (40939.59)	622995.56 (41413.47)
	DNAmGDF15, mean (SD)	755.80 (153.97)	626912.60 (28997.58)	647071.44 (33662.36)	860.24 (201.17)	864.59 (114.45)	776.24 (141.78)	754.84 (127.09)	805.52 (128.87)
	DNAmLeptin, mean (SD)	6612.75 (4429.12)	695.52 (120.32)	752.97 (127.15)	10879.03 (3711.53)	5123.64 (1501.74)	10099.49 (2396.29)	9822.55 (2262.65)	9804.68 (2283.51)
	DNAmPAI1, mean (SD)	22731.46 (3262.02)	21252.93 (1921.23)	19855.83 (2470.21)	16561.4 (2575.48)	22573.66 (2303.32)	19537.97 (2965.05)	19512.46 (2763.93)	19616.53 (2897.86)
	DNAmTIMP1, mean (SD)	34489.32 (1388.72)	17736.89 (2426.04)	16940.58 (2649.89)	33862.7 (1979.5)	37003.31 (1262.55)	34516.61 (1288.97)	34395.46 (1107.66)	35005.87 (1075.76)
	DNAmPACKYRS, mean (SD)	15.79 (12.80)	34101.98 (1054.21)	34127.14 (1102.37)	17.10 (13.19)	9.74 (10.39)	14.57 (11.72)	7.74 (8.98)	10.23 (11.43)
	MRS, continuous, mean (SD)	-3.11 (0.44)	-2.66 (0.48)	-2.52 (0.49)	-2.82 (0.56)	-2.14 (0.52)	-3.11 (0.50)	-3.08 (0.45)	-2.97 (0.49)
	MRS, categorical, n (%)
	low	805 (46.7)	415 (45.8)	226 (30.0)	660 (37.8)	527 (34.5)	557 (53.51)	330 (54.37)	692 (47.76)
	moderate	645 (37.4)	377 (41.6)	382 (50.6)	1024 (58.65)	807 (52.8)	446 (42.84)	262 (43.16)	663 (45.76)
	high	24 (1.4)	112 (12.4)	144 (19.1)	62 (3.55)	195 (12.7)	38 (3.65)	15 (2.47)	94 (6.49)
	NA	251 (14.6)	2 (0.2)	2 (0.3)	\	\	\	\	\
	Extra bits of information
	Serum creatinine measurement method	Jaffe reaction	Kinetic Jaffe method	Kinetic Jaffe method	Original assay Jaffe method, recalibrated to IDMS traceable serum creatinine measures as in PMC4414728	Jaffe reaction	enzymatic colorimetric method, traceable to an isotope dilution mass spectrometry (IDMS) reference method	enzymatic colorimetric method, traceable to an isotope dilution mass spectrometry (IDMS) reference method	enzymatic colorimetric method, traceable to an isotope dilution mass spectrometry (IDMS) reference method
	DNAm tissue source	Whole blood	Whole blood	Whole blood	Whole Blood	Whole blood	Whole Blood	Whole Blood	Whole Blood
	DNAm platform	450K	450K	450K	EPIC	450K	450K	450K	450K
	DNAm normalization pipeline	CPACOR	CPACOR	CPACOR	NOOB normalization using minfi	BMIQ normalization	BMIQ	BMIQ	BMIQ
	Leukocyte estimation method	Houseman algorithm	Houseman algorithm	Houseman algorithm	Houseman	Houseman algorithm	Houseman	Houseman	Houseman
	Population ancestry, n (%)	European, 1725 (100)	European, 906 (100)	European, 754 (100)	African-American	White, 1529 visits, 774 individuals	African-American	Hispanic/Latino	European ancestry

## Sheet: ST2
Additional file 1: Table S2. Study-level regression results for all kidney traits
2.1. Linear regression models
Model 1 : continuous kidney trait ~ DNAm predictor + chronological age + sex
Model 2 : continuous kidney trait ~ DNAm predictor + chronological age + sex + BMI + log-transformed triglycerides + HDL + hypertension + smoking status + diabetes
		KORA												ESTHER - I												ESTHER - II												JHS
		Model 1						Model 2						Model 1						Model 2						Model 1						Model 2						Model 1						Model 2
clock	trait	Estimate	SE	CI, lower	CI, upper	P	N	Estimate	SE	CI, lower	CI, upper	P	N	Estimate	SE	CI, lower	CI, upper	P	N	Estimate	SE	CI, lower	CI, upper	P	N	Estimate	SE	CI, lower	CI, upper	P	N	Estimate	SE	CI, lower	CI, upper	P	N	Estimate	SE	CI, lower	CI, upper	P	N	Estimate	SE	CI, lower	CI, upper	P	N
HorvathAgeAccel	eGFR	-0.0119133	0.00391025	-0.0195774	-0.00424923	0.00234894	1725	-0.00927152	0.00385184	-0.0168211	-0.00172191	0.0161883	1715	-0.00122047	0.00723622	-0.0154035	0.0129625	0.864795	906	0.000314961	0.00679134	-0.0129961	0.013626	0.963188	906	-0.00223529	0.00704706	-0.0160475	0.0115769	0.753019	754	-0.00160784	0.00691372	-0.0151587	0.0119431	0.817876	754	-0.00145115	0.00468338	-0.0106306	0.00772828	0.756674	1677	0.00335973	0.00475373	-0.00595758	0.012677	0.479718	1553
HannumAgeAccel		-0.00679791	0.00351027	-0.013678	8.22077e-05	0.0529601	1725	-0.00593525	0.0034448	-0.012687	0.000816555	0.0850771	1715	-0.00322835	0.00741732	-0.0177663	0.0113096	0.663236	906	-0.00480315	0.00694488	-0.0184151	0.00880882	0.489527	906	-0.00192157	0.00866274	-0.0189005	0.0150574	0.82372	754	-0.00121569	0.00848235	-0.0178411	0.0154097	0.884309	754	-0.0151969	0.00628757	-0.0275206	-0.00287328	0.01565	1677	-0.0152681	0.00660931	-0.0282223	-0.0023138	0.0208836	1553
GrimAgeAccel		-0.0146663	0.00481155	-0.0240969	-0.00523564	0.00233769	1725	-0.0191203	0.00555103	-0.0300003	-0.00824029	0.000586055	1715	-0.00188976	0.00736614	-0.0163274	0.0125479	0.795739	906	0.000440945	0.00858268	-0.0163811	0.017263	0.959154	906	0.000627451	0.00749804	-0.0140687	0.0153236	0.933179	754	0.0147608	0.00877255	-0.00243341	0.031955	0.0928602	754	-0.00127979	0.00415946	-0.00943232	0.00687275	0.758325	1677	-0.00765656	0.00541136	-0.0182628	0.00294969	0.157096	1553
PhenoAgeAccel		-0.0110797	0.00283595	-0.0166382	-0.00552128	9.71091e-05	1725	-0.00931037	0.00282856	-0.0148543	-0.0037664	0.00101668	1715	0.00275197	0.00596063	-0.00893087	0.0144348	0.644373	906	0.00395669	0.00563386	-0.00708567	0.0149991	0.482849	906	-0.00239216	0.00690588	-0.0159277	0.0111434	0.731128	754	-0.000823529	0.00681177	-0.0141746	0.0125275	0.901946	754	-0.00680293	0.00350199	-0.0136668	6.09736e-05	0.0520658	1677	-0.0033605	0.00351248	-0.010245	0.00352396	0.338703	1553
Extrinsic		-0.00661312	0.0029418	-0.012379	-0.00084718	0.0247036	1725	-0.00554561	0.00289658	-0.0112229	0.000131688	0.0557188	1715	-0.00503937	0.00576378	-0.0163364	0.00625764	0.383044	906	-0.00606299	0.0053937	-0.0166346	0.00450866	0.261022	906	-0.0032549	0.00670196	-0.0163907	0.00988094	0.625544	754	-0.00270588	0.00660392	-0.0156496	0.0102378	0.682666	754	-0.0135122	0.00447426	-0.0222817	-0.00474264	0.00252788	1677	-0.0138428	0.00465982	-0.022976	-0.00470957	0.00297145	1553
MRS_continuous		-0.0756139	0.0549123	-0.183242	0.0320143	0.168724	1474	-0.0958793	0.0581852	-0.209922	0.0181637	0.0996034	1465	-0.0516142	0.0718504	-0.192441	0.0892126	0.47271	904	-0.0674409	0.0730709	-0.21066	0.075778	0.356232	904	-0.0168627	0.0772941	-0.168359	0.134634	0.827406	752	0.0479216	0.0810588	-0.110954	0.206797	0.55464	752	-0.105419	0.0402555	-0.18432	-0.0265179	0.0088255	1677	-0.166583	0.0463399	-0.25741	-0.0757574	0.000324615	1553
IEAA		-0.0111198	0.00403865	-0.0190355	-0.00320402	0.00596126	1725	-0.00865944	0.00397437	-0.0164492	-0.000869686	0.0294817	1715	0.000283465	0.00795276	-0.0153039	0.0158709	0.9716	906	0.000555118	0.00748425	-0.014114	0.0152243	0.941044	906	-0.004	0.00798039	-0.0196416	0.0116416	0.617073	754	-0.00419608	0.00778431	-0.0194533	0.0110612	0.590431	754	-0.0011969	0.00474503	-0.0104972	0.00810336	0.800854	1667	0.00455063	0.00484397	-0.00494354	0.0140448	0.347503	1553
MRS_Moderate		0.00455164	0.0471839	-0.0879287	0.097032	0.923164	1474	-0.0160275	0.0479106	-0.109932	0.0778773	0.738029	1465	-0.133031	0.0699606	-0.270154	0.00409134	0.0575513	904	-0.122441	0.0673622	-0.254471	0.00958898	0.0694034	904	-0.0192941	0.0838431	-0.183627	0.145038	0.817924	752	0.0212745	0.0830588	-0.141521	0.18407	0.797868	752	-0.0718324	0.0411351	-0.152457	0.00879235	0.0807664	1677	-0.0931534	0.0420602	-0.175591	-0.0107155	0.0267762	1553
MRS_High		-0.379231	0.180666	-0.733336	-0.0251259	0.0359807	1474	-0.46064	0.181437	-0.816256	-0.105024	0.0112255	1465	-0.00452756	0.107244	-0.214726	0.205671	0.966313	904	-0.019252	0.108425	-0.231765	0.193261	0.858976	904	0.0180863	0.108314	-0.194209	0.230381	0.86741	752	0.102314	0.111372	-0.115976	0.320604	0.358486	752	0.107492	0.114044	-0.116033	0.331018	0.345909	1677	0.124051	0.0990456	-0.0700778	0.318181	0.210399	1553
DNAmADM		-0.00402459	0.00118414	-0.00634551	-0.00170367	0.000692431	1725	-0.00300713	0.00118936	-0.00533827	-0.000675982	0.0115493	1715	-0.00370079	0.00255512	-0.00870882	0.00130724	0.1483	906	-0.00374016	0.00240551	-0.00845496	0.000974646	0.119062	906	-0.00164706	0.0028	-0.00713506	0.00384094	0.551737	754	-0.00121569	0.00272941	-0.00656533	0.00413396	0.659426	754	-0.00472128	0.00179996	-0.00824919	-0.00119336	0.00871606	1677	-0.00483399	0.00192858	-0.008614	-0.00105398	0.0121931	1553
DNAmB2M		-4.05585e-07	2.28899e-07	-8.54227e-07	4.30566e-08	0.0765886	1725	-2.19179e-07	2.26462e-07	-6.63044e-07	2.24686e-07	0.333261	1715	-1.32284e-08	4.52756e-07	-9.0063e-07	8.74173e-07	0.977	906	3.79213e-08	4.29134e-07	-8.03181e-07	8.79024e-07	0.9293	906	-4.39216e-07	4.7451e-07	-1.36925e-06	4.90824e-07	0.355705	754	-4.27451e-07	4.66667e-07	-1.34212e-06	4.87216e-07	0.357838	754	NA	NA	NA	NA	NA	NA	NA	NA	NA	NA	NA	NA
DNAmCystatinC		-2.47104	0.59257	-3.63248	-1.3096	3.19701e-05	1725	-2.30832	0.583355	-3.4517	-1.16494	7.90193e-05	1715	-0.931496	1.04685	-2.98332	1.12033	0.373943	906	-0.427953	0.98189	-2.35246	1.49655	0.663179	906	0.487059	0.953726	-1.38224	2.35636	0.609748	754	0.604706	0.938824	-1.23539	2.4448	0.519637	754	-3.37147e-06	1.06844e-06	-5.46561e-06	-1.27732e-06	0.00160224	1677	-3.50193e-06	1.15881e-06	-5.77319e-06	-1.23066e-06	0.00251104	1553
DNAmGDF15		-0.000313777	0.000187805	-0.000681875	5.43208e-05	0.094951	1725	-0.000335399	0.00018697	-0.000701861	3.10626e-05	0.0730121	1715	-0.000354331	0.000354331	-0.00104882	0.000340157	0.333285	906	-0.000314961	0.000338583	-0.000978583	0.000348661	0.331665	906	-0.000196078	0.000360784	-0.000903216	0.000511059	0.579536	754	0.000180392	0.000372549	-0.000549804	0.000910588	0.630141	754	-0.000342714	0.000207943	-0.000750282	6.48545e-05	0.0993293	1677	-0.000413092	0.000217686	-0.000839756	1.35716e-05	0.0577416	1553
DNAmLeptin		-1.66113e-05	8.73703e-06	-3.37359e-05	5.13283e-07	0.0574359	1725	-5.37337e-06	8.74919e-06	-2.25218e-05	1.1775e-05	0.539193	1715	-3.40158e-06	1.68661e-05	-3.64592e-05	2.96561e-05	0.840205	906	2.88228e-06	1.59764e-05	-2.84314e-05	3.4196e-05	0.856872	906	-1.70588e-05	1.4502e-05	-4.54827e-05	1.1365e-05	0.239433	754	-1.47059e-05	1.42471e-05	-4.26301e-05	1.32184e-05	0.302167	754	2.95159e-06	1.10287e-05	-1.86646e-05	2.45678e-05	0.788986	1677	1.40942e-05	1.17249e-05	-8.88651e-06	3.70749e-05	0.229333	1553
DNAmPACKYRS		-0.000626901	0.00166669	-0.00389361	0.0026398	0.706862	1725	0.00044369	0.00165786	-0.00280571	0.00369309	0.789018	1715	0.000937008	0.00238976	-0.00374693	0.00562094	0.695076	906	0.00113386	0.00223622	-0.00324913	0.00551685	0.612374	906	0.000713725	0.00253333	-0.00425161	0.00567906	0.77788	754	0.00253333	0.00249412	-0.00235514	0.0074218	0.309957	754	0.004278	0.0014366	0.00146226	0.00709374	0.00290267	1677	0.00496571	0.0014406	0.00214213	0.0077893	0.000566922	1562
DNAmPAI1		-2.11301e-05	6.95132e-06	-3.47547e-05	-7.50552e-06	0.00240363	1725	-6.02686e-06	7.35475e-06	-2.04422e-05	8.38846e-06	0.412644	1715	-1.20079e-05	1.3689e-05	-3.88383e-05	1.48225e-05	0.380635	906	2.65039e-05	1.40158e-05	-9.66929e-07	5.39748e-05	0.0589541	906	-2.94118e-06	1.37804e-05	-2.99507e-05	2.40684e-05	0.830977	754	2.33255e-05	1.43961e-05	-4.89082e-06	5.15418e-05	0.105603	754	-5.28931e-06	9.38773e-06	-2.36893e-05	1.31106e-05	0.573144	1677	1.04879e-05	1.0056e-05	-9.22189e-06	3.01976e-05	0.296973	1553
DNAmTIMP1		-5.86877	1.5017	-8.8121	-2.92543	9.66372e-05	1725	-4.43602	1.50693	-7.3896	-1.48243	0.00328656	1715	-0.127598	2.27126	-4.57927	4.32407	0.955205	906	-0.570866	2.16024	-4.80493	3.6632	0.791633	906	-0.578824	2.51765	-5.51341	4.35576	0.818195	754	-0.523137	2.48823	-5.40008	4.3538	0.83353	754	-3.57587e-05	2.33494e-05	-8.15235e-05	1.00062e-05	0.125656	1677	-2.38535e-05	2.4813e-05	-7.2487e-05	2.478e-05	0.336386	1553
HorvathAgeAccel	uACR	0.002737	0.00450966	-0.00610194	0.0115759	0.543985	1716	0.00173176	0.00440217	-0.00689649	0.01036	0.694082	1707	0.00139204	0.00752124	-0.0133496	0.0161337	0.85325	891	-0.00423894	0.00729381	-0.0185348	0.0100569	0.561185	891	0.00487291	0.00739465	-0.0096206	0.0193664	0.510153	742	0.000286789	0.00734114	-0.0141018	0.0146754	0.968884	742	0.0119765	0.00834875	-0.00438708	0.02834	0.151423	761	0.00986265	0.00806695	-0.00594857	0.0256739	0.221481	706
HannumAgeAccel		0.0158127	0.00401574	0.00794188	0.0236836	8.55688e-05	1716	0.0152872	0.00390863	0.00762627	0.0229481	9.54824e-05	1707	0.0138673	0.00765575	-0.00113802	0.0288725	0.070451	891	0.0110796	0.00740619	-0.0034365	0.0255958	0.134871	891	0.018495	0.00905518	0.000746823	0.0362431	0.041444	742	0.015209	0.00898829	-0.00240803	0.0328261	0.0910158	742	0.0210945	0.00946772	0.00253774	0.0396512	0.0258777	761	0.014593	0.00937463	-0.00378126	0.0329673	0.119554	706
GrimAgeAccel		0.0312643	0.00548174	0.0205201	0.0420085	1.38117e-08	1716	0.032523	0.00629055	0.0201936	0.0448525	2.61604e-07	1707	0.0315044	0.00762389	0.0165616	0.0464473	3.92936e-05	891	0.0288761	0.00917699	0.0108892	0.046863	0.00170067	891	0.0418646	0.00759281	0.0269826	0.0567465	4.86299e-08	742	0.0355518	0.00909699	0.0177217	0.0533819	0.000101282	742	0.0127306	0.00806991	-0.0030864	0.0285476	0.114671	761	0.0138982	0.00974437	-0.00520079	0.0329971	0.153788	706
PhenoAgeAccel		0.0134798	0.00326097	0.00708832	0.0198713	3.74257e-05	1716	0.0102678	0.00322576	0.00394531	0.0165903	0.00148367	1707	0.0205487	0.00614602	0.00850248	0.0325949	0.000862445	891	0.0129204	0.00602124	0.00111873	0.024722	0.0321667	891	0.0185535	0.00720736	0.00442709	0.0326799	0.0102286	742	0.0131605	0.00721823	-0.000987191	0.0273083	0.0687127	742	0.0134847	0.00651957	0.000706344	0.0262631	0.0386079	761	0.00495187	0.00633498	-0.00746469	0.0173684	0.434408	706
Extrinsic		0.0136401	0.00336738	0.00703998	0.0202401	5.33617e-05	1716	0.0126538	0.00328908	0.00620722	0.0191004	0.000123885	1707	0.0138053	0.0059469	0.00214938	0.0254612	0.0205111	891	0.0109115	0.00575575	-0.00036977	0.0221928	0.0583062	891	0.0168395	0.00697659	0.00316535	0.0305136	0.0160319	742	0.0132023	0.00696906	-0.000457023	0.0268617	0.0586321	742	0.0185885	0.0073701	0.00414308	0.0330339	0.0116641	761	0.0137838	0.00731263	-0.000548959	0.0281165	0.0594393	706
MRS_continuous		0.385377	0.0614112	0.265011	0.505743	4.58663e-10	1466	0.359896	0.0642946	0.233878	0.485913	2.59586e-08	1458	0.282832	0.0740177	0.137757	0.427907	0.000142184	889	0.227257	0.0777876	0.0747929	0.37972	0.00357008	889	0.437291	0.0781605	0.284096	0.590486	3.11684e-08	740	0.361789	0.0836956	0.197746	0.525833	1.74918e-05	740	0.0709003	0.0708652	-0.0679955	0.209796	0.317071	761	0.0425428	0.0743853	-0.103252	0.188338	0.567373	706
IEAA		0.00209887	0.0046031	-0.0069232	0.0111209	0.64847	1716	0.00146941	0.00450261	-0.00735571	0.0102945	0.744202	1707	0.00512212	0.00823009	-0.0110088	0.0212531	0.533851	891	-0.0029292	0.00800708	-0.0186231	0.0127647	0.714646	891	0.00716555	0.00829933	-0.00910114	0.0234322	0.388192	742	0.00490217	0.00818729	-0.0111449	0.0209493	0.549532	742	0.00891758	0.00855235	-0.00784503	0.0256802	0.297085	758	0.00649638	0.00833523	-0.00984067	0.0228334	0.435751	706
MRS_Moderate		0.144326	0.0533006	0.0398572	0.248796	0.00685245	1466	0.125465	0.0533834	0.0208337	0.230096	0.0188937	1458	0.158673	0.0720177	0.0175179	0.299827	0.02783	889	0.123186	0.0717257	-0.0173965	0.263768	0.0861361	889	0.135786	0.0847826	-0.030388	0.30196	0.109832	740	0.109866	0.0854515	-0.0576187	0.277351	0.198904	740	0.0485899	0.0744643	-0.0973601	0.19454	0.514062	761	0.0305195	0.0738657	-0.114257	0.175296	0.679478	706
MRS_High		0.471737	0.203596	0.0726891	0.870784	0.02064	1466	0.392109	0.201847	-0.00351055	0.787729	0.0522573	1458	0.48292	0.110885	0.265586	0.700255	1.48225e-05	889	0.464867	0.115575	0.23834	0.691395	6.25312e-05	889	0.533696	0.109699	0.318686	0.748706	1.39751e-06	740	0.456438	0.114799	0.231431	0.681445	7.70616e-05	740	0.273766	0.293904	-0.302285	0.849818	0.351604	761	0.116533	0.29689	-0.465371	0.698437	0.694679	706
DNAmADM		0.00502386	0.0013584	0.00236139	0.00768632	0.000223842	1716	0.0043393	0.00135263	0.00168816	0.00699045	0.00136128	1707	0.00552655	0.00264513	0.000342088	0.010711	0.0369807	891	0.00290177	0.00257876	-0.0021526	0.00795614	0.260691	891	0.00801254	0.00289883	0.00233084	0.0136942	0.00584774	742	0.00695401	0.00286873	0.0013313	0.0125767	0.0155939	742	0.00492783	0.00276385	-0.00048931	0.010345	0.0745927	761	0.000701372	0.0027135	-0.00461709	0.00601983	0.79604	706
DNAmB2M		6.58039e-07	2.62443e-07	1.43651e-07	1.17243e-06	0.0122556	1716	5.31886e-07	2.57475e-07	2.72352e-08	1.03654e-06	0.0390009	1707	1.55664e-06	4.67876e-07	6.396e-07	2.47367e-06	0.000912	891	1.11593e-06	4.55664e-07	2.22828e-07	2.00903e-06	0.0145	891	8.95485e-07	4.91639e-07	-6.81271e-08	1.8591e-06	0.0689	742	6.1296e-07	4.87458e-07	-3.42458e-07	1.56838e-06	0.2089	742	3.10833e-07	2.51344e-07	-1.818e-07	8.03467e-07	0.216202	761	3.05479e-07	2.52312e-07	-1.89052e-07	8.0001e-07	0.226002	706
DNAmCystatinC		1.60675	0.684743	0.264648	2.94884	0.0190645	1716	1.54027	0.668507	0.229994	2.85054	0.0213406	1707	1.68062	1.08442	-0.444853	3.80609	0.121539	891	0.916903	1.05027	-1.14162	2.97542	0.382877	891	3.6903	0.974415	1.78045	5.60015	0.000164808	742	2.92517	0.974666	1.01482	4.83551	0.00278156	742	-0.131978	0.970494	-2.03415	1.77019	0.8919	761	-0.348884	0.905901	-2.12445	1.42668	0.7002	706
DNAmGDF15		0.000563118	0.000215257	0.000141213	0.000985022	0.00897435	1716	0.000434803	0.000212785	1.77437e-05	0.000851861	0.0411682	1707	0.000892035	0.000365487	0.000175681	0.00160839	0.0147276	891	0.000597345	0.000363717	-0.00011554	0.00131023	0.101162	891	0.000898829	0.00037291	0.000167926	0.00162973	0.0163137	742	0.00039214	0.000391304	-0.000374816	0.0011591	0.316819	742	0.000110489	0.000249103	-0.000377754	0.000598732	0.65737	761	4.51617e-05	0.000275755	-0.000495318	0.000585641	0.869908	706
DNAmLeptin		7.54806e-06	1.00368e-05	-1.21241e-05	2.72202e-05	0.452132	1716	1.3741e-06	9.95292e-06	-1.81336e-05	2.08818e-05	0.890209	1707	2.92035e-05	1.76991e-05	-5.48673e-06	6.38938e-05	0.0955567	891	8.84956e-06	1.68142e-05	-2.41062e-05	4.18053e-05	0.590162	891	7.23328e-06	1.50502e-05	-2.22651e-05	3.67316e-05	0.629757	742	1.00334e-05	1.50502e-05	-1.94649e-05	3.95318e-05	0.498343	742	1.16324e-05	1.85968e-05	-2.48173e-05	4.80821e-05	0.531639	761	-1.47868e-05	1.72235e-05	-4.85447e-05	1.89712e-05	0.390603	706
DNAmPACKYRS		0.00672863	0.00190628	0.00299232	0.0104649	0.000427007	1716	0.00656793	0.00187942	0.00288427	0.0102516	0.000486844	1707	0.0072115	0.0024823	0.00234619	0.0120768	0.00375656	891	0.0078177	0.0024	0.0031137	0.0125217	0.00116911	891	0.0111371	0.00258946	0.00606177	0.0162125	1.91903e-05	742	0.0104766	0.00260201	0.00537666	0.0155765	6.29678e-05	742	0.00174237	0.00273379	-0.00361586	0.0071006	0.5239	761	0.00487099	0.00284261	-0.00070053	0.0104425	0.0866093	709
DNAmPAI1		2.88766e-05	7.9996e-06	1.31974e-05	4.45558e-05	0.000315303	1716	1.60371e-05	8.38055e-06	-3.8875e-07	3.2463e-05	0.0558377	1707	5.84071e-05	1.41593e-05	3.06549e-05	8.61593e-05	4.01378e-05	891	2.12389e-05	1.50443e-05	-8.24779e-06	5.07257e-05	0.164592	891	5.60201e-05	1.4214e-05	2.81605e-05	8.38796e-05	8.19744e-05	742	4.43144e-05	1.50502e-05	1.48161e-05	7.38127e-05	0.0030949	742	7.27293e-05	1.54673e-05	4.24133e-05	0.000103045	2.57474e-06	761	2.44903e-05	1.78316e-05	-1.04595e-05	5.94401e-05	0.16962	706
DNAmTIMP1		10.7303	1.71166	7.37547	14.0852	4.59019e-10	1716	9.26725	1.70437	5.92669	12.6078	6.1942e-08	1707	7.52257	2.34248	2.93131	12.1138	0.00136856	891	4.21797	2.30602	-0.30183	8.73776	0.0677188	891	10.0002	2.575	4.95325	15.0473	0.000112149	742	8.18896	2.58445	3.12344	13.2545	0.00159563	742	-0.771451	1.60829	-3.92371	2.3808	0.6315	761	-0.860447	1.35439	-3.51504	1.79415	0.5252	706
HorvathAgeAccel	urate	0.00722962	0.003905	-0.000424181	0.0148834	0.0642868	1725	-6.7923e-05	0.00337829	-0.00668937	0.00655352	0.983961	1715	0.0123108	0.00703952	-0.00148667	0.0261082	0.0806579	906	0.00658607	0.00530744	-0.0038165	0.0169886	0.214962	906	0.0104681	0.0213433	-0.0313647	0.0523009	0.625411	66	0.00692673	0.0164179	-0.0252524	0.0391058	0.674612	66	0.0144489	0.00530885	0.00404356	0.0248542	0.00649542	1677	-0.000777786	0.00446608	-0.0095313	0.00797573	0.861744	1553
HannumAgeAccel		0.0101662	0.00349485	0.00331633	0.0170161	0.00367332	1725	0.0058873	0.00301429	-2.07006e-05	0.0117953	0.0509674	1715	0.00844608	0.00722706	-0.00571896	0.0226111	0.242872	906	0.00758875	0.00542666	-0.0030475	0.018225	0.162186	906	0.00788331	0.0254885	-0.0420741	0.0578407	0.75824	66	-0.00580733	0.0197693	-0.0445552	0.0329406	0.770078	66	0.0172705	0.00566798	0.00616129	0.0283798	0.00231111	1677	0.00212671	0.00508536	-0.0078406	0.012094	0.675799	1553
GrimAgeAccel		0.0278399	0.00476284	0.0185047	0.037175	6.03862e-09	1725	0.0196269	0.00485663	0.0101079	0.0291459	5.55337e-05	1715	0.00659611	0.00717348	-0.0074639	0.0206561	0.358226	906	0.0037562	0.00671132	-0.00939799	0.0169104	0.575751	906	0.00983718	0.0259973	-0.0411175	0.0607919	0.706347	66	0.0214993	0.0229308	-0.023445	0.0664437	0.352466	66	0.0211043	0.00505569	0.0111951	0.0310134	2.98816e-05	1677	0.0124973	0.00541384	0.00188619	0.0231084	0.0209768	1553
PhenoAgeAccel		0.0168671	0.0028106	0.0113583	0.0223759	2.38218e-09	1725	0.0108357	0.00247376	0.00598716	0.0156843	1.25751e-05	1715	0.00615137	0.0058071	-0.00523054	0.0175333	0.289735	906	0.0030998	0.00440723	-0.00553838	0.011738	0.482	906	0.0327341	0.0196201	-0.0057213	0.0711894	0.100251	66	0.0237856	0.0153256	-0.00625265	0.0538239	0.126334	66	0.022325	0.00389774	0.0146855	0.0299646	1.0181e-08	1677	0.00945765	0.00342053	0.00275342	0.0161619	0.00569282	1553
Extrinsic		0.0114035	0.00292429	0.00567193	0.0171351	0.000100056	1725	0.00716884	0.00253243	0.00220528	0.0121324	0.00469746	1715	0.00787006	0.00561286	-0.00313115	0.0188713	0.161062	906	0.00607234	0.00421768	-0.00219432	0.014339	0.150287	906	0.0149864	0.0195862	-0.0234024	0.0533753	0.446941	66	0.00284464	0.0152239	-0.0269942	0.0326834	0.852424	66	0.0144755	0.00437394	0.00590256	0.0230484	0.00093468	1677	0.00358876	0.00389495	-0.00404534	0.0112229	0.356848	1553
MRS_continuous		0.179988	0.0530829	0.0759453	0.28403	0.000715643	1474	0.166429	0.0491997	0.0699978	0.262861	0.000736764	1465	0.0464501	0.0696584	-0.0900804	0.182981	0.50517	904	0.0379571	0.0570127	-0.0737878	0.149702	0.505696	904	0.284668	0.236703	-0.17927	0.748605	0.233604	66	0.321642	0.181954	-0.0349878	0.678271	0.0825823	66	0.131468	0.0444367	0.0443723	0.218564	0.0030909	1677	0.0943287	0.0426863	0.0106636	0.177994	0.0271181	1553
IEAA		0.00464115	0.00403224	-0.00326204	0.0125443	0.249889	1725	-0.00250091	0.00347876	-0.00931928	0.00431746	0.472296	1715	0.0110516	0.0077361	-0.00411119	0.0262143	0.153685	906	0.00558272	0.00586068	-0.00590422	0.0170697	0.341036	906	0.00168453	0.0227951	-0.0429939	0.046363	0.941354	66	0.00416554	0.0163229	-0.0278274	0.0361585	0.799647	66	0.0145781	0.00540579	0.00398278	0.0251735	0.00700175	1667	-0.000806721	0.00454207	-0.00970919	0.00809574	0.859029	1553
MRS_Moderate		0.0674068	0.0457377	-0.022239	0.157053	0.140758	1474	0.0912023	0.0405936	0.0116388	0.170766	0.0248079	1465	0.0874079	0.067917	-0.0457093	0.220525	0.1981	904	-0.0045077	0.0527328	-0.107864	0.0988485	0.931897	904	-0.100746	0.261533	-0.613351	0.411859	0.70132	66	-0.0389281	0.203121	-0.437045	0.359189	0.84874	66	0.130107	0.0498847	0.0323329	0.227881	0.00910327	1677	0.0658586	0.0434876	-0.019377	0.151094	0.129918	1553
MRS_High		0.375125	0.175128	0.0318737	0.718377	0.0323574	1474	0.374892	0.154085	0.0728848	0.676899	0.0150936	1465	-0.0282518	0.104086	-0.23226	0.175756	0.786132	904	0.00596986	0.0847287	-0.160098	0.172038	0.94384	904	-0.0592809	0.354206	-0.753525	0.634963	0.867627	66	0.2019	0.279308	-0.345544	0.749343	0.47277	66	-0.124444	0.118612	-0.356924	0.108037	0.294103	1677	-0.0106004	0.114945	-0.235893	0.214692	0.926523	1553
DNAmADM		0.00581071	0.0011762	0.00350537	0.00811605	8.55919e-07	1725	0.00199729	0.00104147	-4.39767e-05	0.00403856	0.0553066	1715	0.00234762	0.00249029	-0.00253334	0.00722859	0.345968	906	-0.000120563	0.0018848	-0.00381476	0.00357364	0.949839	906	0.0138195	0.0089213	-0.00366621	0.0313053	0.126634	66	0.0187381	0.00665265	0.00569894	0.0317773	0.00668716	66	0.00937121	0.00147597	0.00647831	0.0122641	2.16e-10	1677	0.00422961	0.00137672	0.00153125	0.00692798	0.00212454	1553
DNAmB2M		6.02521e-07	2.2795e-07	1.55738e-07	1.0493e-06	0.00828691	1725	2.40624e-07	1.98007e-07	-1.47471e-07	6.28718e-07	0.224449	1715	4.16343e-07	4.42599e-07	-4.51151e-07	1.28384e-06	0.347173	906	2.91025e-07	3.34159e-07	-3.63928e-07	9.45977e-07	0.38406	906	1.29172e-06	1.71438e-06	-2.06847e-06	4.65191e-06	0.453957	66	1.57056e-06	1.27748e-06	-9.33297e-07	4.07441e-06	0.223927	66	9.30782e-08	1.4959e-07	-2.00118e-07	3.86275e-07	0.533795	1677	-2.11643e-07	1.37798e-07	-4.81727e-07	5.84399e-08	0.124562	1553
DNAmCystatinC		1.6726	0.592379	0.511537	2.83366	0.00480448	1725	0.711291	0.513809	-0.295775	1.71836	0.166433	1715	1.82284	1.01902	-0.174443	3.82012	0.0739753	906	0.770395	0.767716	-0.734328	2.27512	0.315888	906	-2.0751	3.2308	-8.40747	4.25727	0.52305	66	-2.82096	2.43976	-7.60288	1.96096	0.252493	66	0.912118	0.600294	-0.264459	2.08869	0.1287	1677	-0.713353	0.545353	-1.78224	0.355539	0.1909	1553
DNAmGDF15		0.000499919	0.000186999	0.000133401	0.000866438	0.0075802	1725	0.000414551	0.000163416	9.42554e-05	0.000734848	0.0112763	1715	0.000269257	0.000343604	-0.000404206	0.000942719	0.433889	906	4.48761e-05	0.000265908	-0.000476303	0.000566055	0.865606	906	0.00157802	0.00116825	-0.00071175	0.00386779	0.181776	66	0.00100339	0.000976934	-0.000911398	0.00291818	0.309036	66	0.000134322	0.000191922	-0.000241845	0.000510489	0.484004	1677	3.84037e-05	0.00016156	-0.000278255	0.000355062	0.81211	1553
DNAmLeptin		3.11615e-05	8.68725e-06	1.41345e-05	4.81885e-05	0.000343808	1725	-7.61831e-07	7.65152e-06	-1.57588e-05	1.42352e-05	0.920701	1715	2.47823e-05	1.67448e-05	-8.03751e-06	5.76021e-05	0.13234	906	3.52579e-06	1.2726e-05	-2.14173e-05	2.84689e-05	0.777836	906	7.12347e-05	5.0882e-05	-2.84939e-05	0.000170963	0.165717	66	6.58073e-05	3.79919e-05	-8.65672e-06	0.000140271	0.0899864	66	4.29753e-05	1.32787e-05	1.6949e-05	6.90015e-05	0.00121044	1677	4.26359e-06	1.18323e-05	-1.89277e-05	2.74549e-05	0.718596	1553
DNAmPACKYRS		0.0040831	0.00165878	0.000831893	0.00733431	0.0139329	1725	0.00296118	0.00144563	0.000127747	0.00579462	0.0406768	1715	-0.000529136	0.00232887	-0.00509372	0.00403545	0.819871	906	0.00115204	0.00175017	-0.00227829	0.00458237	0.510592	906	-0.00278155	0.00842605	-0.0192966	0.0137335	0.742222	66	-8.14111e-05	0.00708277	-0.0139636	0.0138008	0.991203	66	0.00241173	0.00186496	-0.00124359	0.00606705	0.195948	1677	0.00565231	0.00164627	0.00242561	0.00887901	0.000596071	1562
DNAmPAI1		6.10402e-05	6.79124e-06	4.77293e-05	7.4351e-05	6.45513e-19	1725	1.7008e-05	6.41911e-06	4.42652e-06	2.95894e-05	0.00813361	1715	6.96584e-05	1.33958e-05	4.34025e-05	9.59143e-05	1.56056e-07	906	2.07636e-05	1.07167e-05	-2.41125e-07	4.17683e-05	0.0620108	906	9.29444e-05	4.34193e-05	7.84261e-06	0.000178046	0.0362054	66	4.07056e-05	3.52782e-05	-2.84396e-05	0.000109851	0.258948	66	9.64536e-05	9.72948e-06	7.73839e-05	0.000115523	0	1677	4.61312e-05	9.0723e-06	2.83495e-05	6.39129e-05	3.67936e-07	1553
DNAmTIMP1		8.13912	1.49092	5.21691	11.0613	5.48209e-08	1725	3.45252	1.31962	0.866067	6.03897	0.00896734	1715	0.359879	2.2134	-3.97838	4.69814	0.870878	906	-0.448895	1.68922	-3.75976	2.86197	0.790504	906	6.70298	9.06432	-11.0631	24.469	0.462398	66	10.8193	6.86906	-2.64403	24.2827	0.120869	66	1.94688	0.854	0.273042	3.62072	0.0226	1677	-0.409294	0.753647	-1.88644	1.06785	0.5871	1553
2.2. Logistic regression models
Model 1 : binary kidney trait ~ DNAm predictor + chronological age + sex
Model 2 : binary kidney trait ~ DNAm predictor + chronological age + sex + BMI + log-transformed triglycerides + HDL + hypertension + smoking status + diabetes
		KORA														ESTHER - I														ESTHER - II														JHS
		Model 1							Model 2							Model 1							Model 2							Model 1							Model 2							Model 1
clock	kidney trait	Estimate	SE	OR	OR CI, lower	OR CI, upper	P	N	Estimate	SE	OR	OR CI, lower	OR CI, upper	P	N	Estimate	SE	OR	OR CI, lower	OR CI, upper	P	N	Estimate	SE	OR	OR CI, lower	OR CI, upper	P	N	Estimate	SE	OR	OR CI, lower	OR CI, upper	P	N	Estimate	SE	OR	OR CI, lower	OR CI, upper	P	N	Estimate	SE	OR	OR CI, lower	OR CI, upper	P
HorvathAgeAccel	CKD	0.0219157	0.0197062	1.02216	0.98343	1.06241	0.266086	1725	0.0155626	0.0202029	1.01568	0.976251	1.05671	0.441113	1715	0.0341	0.0304	1.03469	0.974838	1.09821	0.261609	906	0.0354	0.0307	1.03603	0.975532	1.10029	0.248383	906	-0.0139	0.0251	0.986196	0.938853	1.03593	0.578779	754	-0.0213	0.0261	0.978925	0.930107	1.03031	0.413801	754	-0.0114929	0.0235037	0.988573	0.944065	1.03518	0.624855
HannumAgeAccel		0.0272093	0.0181527	1.02758	0.991665	1.0648	0.133897	1725	0.0228148	0.0190135	1.02308	0.985652	1.06192	0.230167	1715	0.0392	0.0318	1.03998	0.977137	1.10686	0.217473	906	0.0421	0.0321	1.043	0.979399	1.11073	0.189893	906	-0.0375	0.0317	0.963194	0.90517	1.02494	0.237077	754	-0.0447	0.033	0.956284	0.89639	1.02018	0.175483	754	0.0814841	0.0228985	1.0849	1.03728	1.1347	0.000373
GrimAgeAccel		0.12695	0.0262998	1.13536	1.07832	1.19542	1.38594e-06	1725	0.138802	0.0317025	1.1489	1.07968	1.22255	1.19622e-05	1715	-0.00098	0.0328	0.99902	0.936816	1.06536	0.976027	906	-0.0241	0.0413	0.976188	0.900281	1.05849	0.5603	906	0.0362	0.0271	1.03686	0.983226	1.09343	0.182407	754	-0.0188	0.0345	0.981376	0.917209	1.05003	0.585181	754	0.0708138	0.0196956	1.07338	1.03273	1.11563	0.000323877
PhenoAgeAccel		0.0704856	0.0147504	1.07303	1.04245	1.1045	1.76544e-06	1725	0.0665324	0.015352	1.0688	1.03712	1.10144	1.46567e-05	1715	0.0167	0.0255	1.01684	0.967268	1.06895	0.51379	906	0.0168	0.0267	1.01694	0.965092	1.07158	0.530358	906	-0.00638	0.0242	0.99364	0.94761	1.04191	0.791805	754	-0.0149	0.0252	0.98521	0.937731	1.03509	0.555653	754	0.0558794	0.0150701	1.05747	1.02669	1.08917	0.000208921
Extrinsic		0.0289979	0.0152102	1.02942	0.999186	1.06057	0.0565881	1725	0.0235499	0.015935	1.02383	0.992347	1.05631	0.139442	1715	0.036	0.0249	1.03666	0.987278	1.0885	0.148508	906	0.0356	0.0251	1.03624	0.986496	1.08849	0.157032	906	-0.0148	0.0243	0.985309	0.939481	1.03337	0.542243	754	-0.0219	0.0254	0.978338	0.930825	1.02828	0.387943	754	0.0761357	0.0182194	1.07911	1.04125	1.11834	2.9302e-05
MRS_continuous		0.831632	0.286852	2.29706	1.30918	4.03038	0.00374151	1474	0.83211	0.306556	2.29816	1.26019	4.19109	0.00664002	1465	0.1597	0.3083	1.17316	0.641101	2.14678	0.604412	904	0.0993	0.3584	1.1044	0.547078	2.22947	0.781768	904	0.3227	0.2748	1.38085	0.805809	2.36625	0.240407	752	0.0101	0.3045	1.01015	0.556149	1.83477	0.973498	752	1.01917	0.186777	2.77089	1.92146	3.99583	4.853e-08
IEAA		0.021793	0.0210899	1.02203	0.980646	1.06516	0.301447	1725	0.0184098	0.0215807	1.01858	0.976395	1.06259	0.393621	1715	0.0263	0.0343	1.02665	0.959898	1.09804	0.442663	906	0.0262	0.0347	1.02655	0.95905	1.09879	0.449487	906	-0.0405	0.0295	0.960309	0.906359	1.01747	0.169344	754	-0.044	0.0304	0.956954	0.9016	1.01571	0.148464	754	-0.00955634	0.0252933	0.990489	0.942583	1.04083	0.705564
MRS_Moderate		0.404033	0.257878	1.49785	0.903565	2.48302	0.11717	1474	0.379351	0.263743	1.46134	0.87146	2.45049	0.150338	1465	0.0751	0.1998	1.07799	0.728689	1.59474	0.706882	904	0.0769	0.2078	1.07993	0.718645	1.62286	0.711313	904	-0.035	0.1676	0.965605	0.695241	1.34111	0.834637	752	-0.00895	0.1716	0.99109	0.708018	1.38734	0.958419	752	0.726881	0.271106	2.06862	1.21594	3.51925	0.00733648
MRS_High		0.968117	0.70974	2.63298	0.655096	10.5826	0.172554	1474	1.10292	0.75514	3.01296	0.685813	13.2368	0.144137	1465	0.0394	0.2752	1.04019	0.606536	1.78388	0.886094	904	-0.0192	0.3074	0.980983	0.537029	1.79195	0.95021	904	0.2018	0.2116	1.2236	0.808208	1.8525	0.340197	752	0.019	0.2272	1.01918	0.652913	1.59092	0.933429	752	1.03557	0.472471	2.81671	1.11575	7.11078	0.0283932
DNAmADM		0.0246396	0.00638194	1.02495	1.01221	1.03785	0.000113006	1725	0.0233603	0.00679225	1.02364	1.0101	1.03735	0.000583312	1715	0.0135	0.0111	1.01359	0.991778	1.03588	0.225334	906	0.0107	0.0116	1.01076	0.988036	1.034	0.357562	906	-0.00923	0.0102	0.990812	0.971201	1.01082	0.363012	754	-0.0124	0.0105	0.987677	0.967558	1.00821	0.235386	754	0.0299184	0.00714122	1.03037	1.01605	1.04489	2.7953e-05
DNAmB2M		3.48697e-06	1.22028e-06	1	1	1.00001	0.00426971	1725	2.8978e-06	1.26684e-06	1	1	1.00001	0.0221709	1715	-2.76e-07	1.997e-06	1	0.999996	1	0.889953	906	-4.98e-07	1.993e-06	1	0.999996	1	0.802607	906	8.243e-07	1.66e-06	1	0.999998	1	0.619505	754	1.575e-07	1.761e-06	1	0.999997	1	0.92871	754	9.71254e-07	5.53539e-07	1	1	1	0.0793236
DNAmCystatinC		1.62713e-05	4.76235e-06	1.00002	1.00001	1.00003	0.000633954	1725	1.56857e-05	5.02256e-06	1.00002	1.00001	1.00003	0.00178993	1715	3.4058	4.5545	30.1384	0.00400176	226981	0.454591	906	2.6228	4.6327	13.7742	0.00156904	120921	0.571285	906	0.1513	3.4263	1.16335	0.00140988	959.918	0.964775	754	-1.5746	3.6191	0.20709	0.000171997	249.345	0.663502	754	1.36183e-05	5.12873e-06	1.00001	1	1.00002	0.00792373
DNAmGDF15		0.00193208	0.000936619	1.00193	1.0001	1.00378	0.0391294	1725	0.00181277	0.000983956	1.00181	0.999884	1.00375	0.0654264	1715	0.000524	0.0015	1.00052	0.997587	1.00347	0.72779	906	0.000468	0.00159	1.00047	0.997355	1.00359	0.76898	906	0.000577	0.00129	1.00058	0.99805	1.00311	0.653699	754	-0.00117	0.00141	0.998831	0.996074	1.0016	0.406238	754	0.00146338	0.000652248	1.00146	1.00019	1.00275	0.0248591
DNAmLeptin		6.69675e-05	4.36841e-05	1.00007	0.999981	1.00015	0.125278	1725	3.40794e-05	4.64086e-05	1.00003	0.999943	1.00012	0.462745	1715	-0.0001	7.5e-05	0.9999	0.999753	1.00005	0.185954	906	-0.00014	8e-05	0.99986	0.999703	1.00002	0.0799806	906	-6e-05	5.2e-05	0.99994	0.999838	1.00004	0.238531	754	-6e-05	5.4e-05	0.99994	0.999834	1.00005	0.251516	754	8.9223e-05	5.79027e-05	1.00009	0.999976	1.0002	0.123338
DNAmPACKYRS		0.0253996	0.00942958	1.02572	1.00694	1.04486	0.00706827	1725	0.0227596	0.0100663	1.02302	1.00303	1.0434	0.0237617	1715	-0.0068	0.011	0.993223	0.972038	1.01487	0.537307	906	-0.00931	0.0113	0.990733	0.969032	1.01292	0.40897	906	0.018	0.00887	1.01816	1.00062	1.03602	0.0423829	754	0.0136	0.00924	1.01369	0.9955	1.03222	0.141827	754	0.00927992	0.00816295	1.00932	0.993303	1.0256	0.255607
DNAmPAI1		7.46007e-05	3.74699e-05	1.00007	1	1.00015	0.0464865	1725	2.9516e-05	4.05941e-05	1.00003	0.99995	1.00011	0.467164	1715	7.858e-06	5.9e-05	1.00001	0.999892	1.00012	0.894757	906	-9e-05	6.9e-05	0.99991	0.999775	1.00005	0.202069	906	-8e-05	5.1e-05	0.99992	0.99982	1.00002	0.10339	754	-0.00016	5.7e-05	0.99984	0.999728	0.999952	0.00443194	754	0.000122764	4.34314e-05	1.00012	1.00004	1.00021	0.0047041
DNAmTIMP1		0.000796682	0.000216182	1.0008	1.00037	1.00122	0.000228486	1725	0.000654485	0.000223531	1.00065	1.00022	1.00109	0.00341217	1715	4.132	9.6708	62.3024	3.65219e-07	10628110000	0.669189	906	5.4922	10.3104	242.791	4.06296e-07	145084800000	0.59425	906	4.9602	8.93	142.622	3.57123e-06	5695829000	0.578587	754	4.3833	9.3987	80.1019	8.00402e-07	8016374000	0.640953	754	0.000190601	0.000140148	1.00019	0.999916	1.00046	0.17383
HorvathAgeAccel	microalbuminuria	0.0124039	0.0163153	1.01248	0.980616	1.04538	0.447099	1716	0.0097927	0.0166692	1.00984	0.977381	1.04338	0.556886	1707	0.0057	0.0232	1.00572	0.961009	1.0525	0.806254	611	-0.00105	0.0246	0.998951	0.951928	1.0483	0.965965	611	0.03	0.0226	1.03045	0.985806	1.07713	0.183472	509	0.0155	0.0232	1.01562	0.970473	1.06287	0.505925	509	0.047847	0.0259726	1.04901	0.996945	1.10379	0.0654447
HannumAgeAccel		0.056904	0.0139129	1.05855	1.03008	1.08782	4.31332e-05	1716	0.0588861	0.0143698	1.06065	1.0312	1.09095	4.16915e-05	1707	0.0376	0.0238	1.03832	0.990993	1.0879	0.11398	611	0.0454	0.0255	1.04645	0.99543	1.10008	0.0745912	611	0.0404	0.0275	1.04123	0.986591	1.09889	0.14207	509	0.0364	0.0285	1.03707	0.980728	1.09665	0.201896	509	0.0530462	0.0259983	1.05448	1.00209	1.1096	0.0413134
GrimAgeAccel		0.0946136	0.0189916	1.09923	1.05907	1.14092	6.29782e-07	1716	0.110823	0.0236215	1.1172	1.06665	1.17014	2.71079e-06	1707	0.0994	0.0231	1.10451	1.05562	1.15567	1.73961e-05	611	0.0955	0.031	1.10021	1.03535	1.16913	0.00206689	611	0.1159	0.0247	1.12288	1.06982	1.17858	2.749e-06	509	0.1179	0.0305	1.12513	1.05984	1.19444	0.000109487	509	0.0275359	0.0248552	1.02792	0.979042	1.07923	0.267926
PhenoAgeAccel		0.0395494	0.0117924	1.04034	1.01657	1.06467	0.000797102	1716	0.0330575	0.0123776	1.03361	1.00884	1.05899	0.00756812	1707	0.0623	0.0193	1.06428	1.02477	1.10531	0.00124535	611	0.0465	0.0204	1.0476	1.00654	1.09033	0.0224526	611	0.0605	0.022	1.06237	1.01753	1.10918	0.0059421	509	0.0489	0.0229	1.05012	1.00402	1.09832	0.0326497	509	0.0289079	0.018735	1.02933	0.992218	1.06783	0.122833
Extrinsic		0.0515656	0.011846	1.05292	1.02875	1.07765	1.34299e-05	1716	0.051731	0.0122278	1.05309	1.02815	1.07864	2.33081e-05	1707	0.0412	0.0188	1.04206	1.00436	1.08117	0.0283709	611	0.0475	0.0203	1.04865	1.00774	1.09121	0.0194386	611	0.0368	0.0213	1.03749	0.995064	1.08172	0.0841244	509	0.0299	0.0221	1.03035	0.986674	1.07596	0.176293	509	0.0441177	0.0204556	1.04511	1.00403	1.08786	0.0310249
MRS_continuous		1.1964	0.214205	3.30818	2.17397	5.03413	2.33318e-08	1466	1.20679	0.237213	3.34273	2.09982	5.32134	3.63081e-07	1458	0.8433	0.2289	2.32402	1.48387	3.63986	0.000230059	609	0.8136	0.2746	2.25602	1.31704	3.86444	0.00305391	609	1.0673	0.2483	2.90752	1.78717	4.7302	1.72385e-05	508	0.952	0.268	2.59089	1.53222	4.38101	0.000381469	508	0.0510029	0.198197	1.05233	0.713578	1.55188	0.796921
IEAA		0.0080483	0.0173109	1.00808	0.974451	1.04287	0.641983	1716	0.00914013	0.017682	1.00918	0.974806	1.04477	0.605213	1707	0.00959	0.0262	1.00964	0.959098	1.06284	0.71423	611	-0.00139	0.028	0.998611	0.945284	1.05495	0.960504	611	0.0426	0.0267	1.04352	0.990315	1.09958	0.110014	509	0.0316	0.0271	1.0321	0.978714	1.08841	0.243	509	0.0407145	0.0278829	1.04155	0.986161	1.10006	0.144236
MRS_Moderate		0.597379	0.204554	1.81735	1.21708	2.71368	0.00349583	1466	0.606023	0.212855	1.83313	1.20783	2.78214	0.00441178	1458	-0.1168	0.1439	0.889763	0.671095	1.17968	0.416862	609	-0.2557	0.1547	0.774374	0.571831	1.04866	0.0983224	609	-0.0107	0.1511	0.989357	0.735757	1.33037	0.943424	508	0.0113	0.1551	1.01136	0.746249	1.37066	0.94179	508	-0.0881418	0.239032	0.915631	0.573129	1.46281	0.712318
MRS_High		1.59545	0.492924	4.93055	1.87633	12.9563	0.00120918	1466	1.59492	0.535813	4.92794	1.72414	14.0851	0.00291426	1458	0.6462	0.1918	1.90828	1.31032	2.7791	0.000755748	609	0.7409	0.2197	2.09782	1.36382	3.22687	0.000742889	609	0.6426	0.1846	1.90142	1.32417	2.73031	0.000497883	508	0.6165	0.1956	1.85243	1.26254	2.71794	0.00161794	508	0.319881	0.570497	1.37696	0.450096	4.2125	0.574998
DNAmADM		0.0173381	0.00499824	1.01749	1.00757	1.02751	0.000522695	1716	0.0167736	0.00536487	1.01692	1.00628	1.02766	0.00176867	1707	0.0218	0.00843	1.02204	1.00529	1.03907	0.00956965	611	0.0147	0.00889	1.01481	0.997279	1.03265	0.0970044	611	0.0229	0.00878	1.02316	1.00571	1.04092	0.00925142	509	0.023	0.00904	1.02327	1.0053	1.04156	0.0109903	509	0.0086489	0.00772664	1.00869	0.993526	1.02408	0.262987
DNAmB2M		2.02648e-06	9.62008e-07	1	1	1	0.0351599	1716	1.77425e-06	1.00026e-06	1	1	1	0.076097	1707	5.845e-06	1.527e-06	1.00001	1	1.00001	0.000130011	611	5.213e-06	1.605e-06	1.00001	1	1.00001	0.00116426	611	2.479e-06	1.461e-06	1	1	1.00001	0.0898017	509	1.524e-06	1.523e-06	1	0.999999	1	0.317175	509	3.13934e-07	6.31347e-07	1	0.999999	1	0.619017
DNAmCystatinC		5.36852	2.48156	214.544	1.65641	27788.7	0.0305135	1716	5.89844	2.60595	364.468	2.20512	60240.2	0.0236078	1707	6.3077	3.3667	548.781	0.747492	402895	0.0609959	611	4.0875	3.5099	59.5907	0.0613044	57925	0.244196	611	11.0249	3.0582	61383.7	153.06	2.46176e+07	0.000312061	509	9.5089	3.1592	13479.2	27.5739	6.58913e+06	0.00261312	509	8.29823e-07	5.68858e-06	1	0.99999	1.00001	0.88402
DNAmGDF15		0.00139942	0.000757701	1.0014	0.999914	1.00289	0.0647578	1716	0.00108128	0.000796628	1.00108	0.99952	1.00265	0.17468	1707	0.00333	0.00107	1.00334	1.00123	1.00544	0.00185065	611	0.00248	0.00114	1.00248	1.00025	1.00473	0.0302989	611	0.00187	0.0011	1.00187	0.999714	1.00403	0.0893921	509	0.000845	0.0012	1.00085	0.998494	1.0032	0.482881	509	-0.000644442	0.000772197	0.999356	0.997844	1.00087	0.403967
DNAmLeptin		4.11768e-05	3.65257e-05	1.00004	0.99997	1.00011	0.2596	1716	2.35664e-05	3.87545e-05	1.00002	0.999948	1.0001	0.543124	1707	0.000106	5.2e-05	1.00011	1	1.00021	0.0416555	611	6.7e-05	5.4e-05	1.00007	0.999961	1.00017	0.213617	611	2.9e-05	4.6e-05	1.00003	0.999939	1.00012	0.521532	509	3.5e-05	4.8e-05	1.00004	0.999941	1.00013	0.456816	509	3.46207e-05	5.7483e-05	1.00003	0.999922	1.00015	0.54699
DNAmPACKYRS		0.0209914	0.00653334	1.02121	1.00822	1.03437	0.0013137	1716	0.0220285	0.00685383	1.02227	1.00863	1.0361	0.00130879	1707	0.0209	0.00726	1.02112	1.00669	1.03575	0.00407109	611	0.0245	0.00789	1.0248	1.00908	1.04077	0.00191322	611	0.0281	0.00825	1.0285	1.012	1.04526	0.000668924	509	0.028	0.0087	1.0284	1.01101	1.04608	0.00127279	509	0.00375704	0.00822768	1.00376	0.987707	1.02008	0.647934
DNAmPAI1		0.000108228	2.94609e-05	1.00011	1.00005	1.00017	0.000239152	1716	7.89661e-05	3.21294e-05	1.00008	1.00002	1.00014	0.013981	1707	0.000161	4.4e-05	1.00016	1.00007	1.00025	0.00026149	611	4.9e-05	5.1e-05	1.00005	0.999949	1.00015	0.341811	611	0.00018	4.4e-05	1.00018	1.00009	1.00027	4.16574e-05	509	0.000158	4.7e-05	1.00016	1.00007	1.00025	0.00082296	509	0.000243386	5.14075e-05	1.00024	1.00014	1.00034	2.19648e-06
DNAmTIMP1		27.6134	6.05752	9.82521e+11	6.85615e+06	1.408e+17	5.15121e-06	1716	24.6956	6.31242	5.3107e+10	224860	1.25427e+16	9.14512e-05	1707	28.0342	7.2159	1.49657e+12	1.07845e+06	2.07681e+18	0.000102303	611	19.9076	7.4967	4.42345e+08	183.84	1064340762432300	0.00791852	611	28.0963	7.7533	1.59246e+12	400245	6.33593e+18	0.000290307	509	24.1271	7.9866	3.00792e+10	4785.59	1.89059e+17	0.00252	509	-1.84242e-05	0.000128861	0.999982	0.999729	1.00023	0.886308
Legend here
pval threshold	0.00142857
[truncated: 64 more columns]

## Sheet: ST3
Additional file 1: Table S3. Results from meta-analyses of fully-adjusted model
3.1. Linear regression models
Meta-analysis of model 2: continuous kidney trait ~ DNAm predictor + chronological age + sex + BMI + log-transformed triglycerides + HDL + hypertension + smoking status + diabetes
			Fixed effects meta-analysis (IVW)														Random effects meta-analysis (REML)
clock	trait	group	beta_FE	se_FE	zval_FE	pval_FE	ci.lb_FE	ci.ub_FE	vb_FE	k_FE	QE_FE	QEp_FE	QM_FE	QMp_FE	I2_FE	H2_FE	beta_RE	se_RE	zval_RE	pval_RE	ci.lb_RE	ci.ub_RE	vb_RE	tau2_RE	se.tau2_RE	k_RE	QE_RE	QEp_RE	QM_RE	QMp_RE	I2_RE	H2_RE
EEAA	eGFR	all	-0.00825588	0.00174006	-4.74458	2.08937e-06	-0.0116663	-0.00484542	3.02782e-06	8	12.3517	0.0895688	22.5111	2.08937e-06	43.3279	1.76454	-0.00889585	0.00250857	-3.54618	0.000390855	-0.0138126	-0.00397914	6.29293e-06	2.10862e-05	2.61388e-05	8	12.3517	0.0895688	12.5754	0.000390855	44.4519	1.80024
GrimAgeAccel		all	-0.00638558	0.00206067	-3.09878	0.00194318	-0.0104244	-0.00234673	4.24637e-06	8	19.1642	0.00768812	9.60245	0.00194318	63.4736	2.73775	-0.00609221	0.0041689	-1.46135	0.14392	-0.0142631	0.00207868	1.73797e-05	8.79961e-05	7.30919e-05	8	19.1642	0.00768812	2.13554	0.14392	69.3282	3.26033
HannumAgeAccel		all	-0.00719479	0.00185439	-3.87987	0.000104512	-0.0108293	-0.00356025	3.43876e-06	8	3.68191	0.815599	15.0534	0.000104512	0	0.525987	-0.00719479	0.00185439	-3.87987	0.000104512	-0.0108293	-0.00356025	3.43876e-06	0	1.34161e-05	8	3.68191	0.815599	15.0534	0.000104512	0	1
HorvathAgeAccel		all	-0.00616397	0.00177479	-3.47306	0.000514551	-0.0096425	-0.00268544	3.14989e-06	8	11.4185	0.121376	12.0622	0.000514551	38.6961	1.63122	-0.00525546	0.0024007	-2.18913	0.0285871	-0.00996075	-0.000550169	5.76337e-06	1.79984e-05	2.39306e-05	8	11.4185	0.121376	4.79231	0.0285871	40.737	1.68739
IEAA		all	-0.00396427	0.00203509	-1.94795	0.0514205	-0.00795298	2.44415e-05	4.14161e-06	8	8.34128	0.303464	3.79452	0.0514205	16.08	1.19161	-0.00369965	0.00238024	-1.55432	0.120108	-0.00836483	0.000965529	5.66554e-06	9.4809e-06	2.28027e-05	8	8.34128	0.303464	2.41591	0.120108	21.3438	1.27135
MRS_continuous		all	-0.116705	0.0213186	-5.47435	4.39122e-08	-0.158489	-0.0749217	0.000454482	8	9.67792	0.207572	29.9685	4.39122e-08	27.6704	1.38256	-0.115678	0.0224017	-5.1638	2.41988e-07	-0.159585	-0.0717714	0.000501837	0.000322764	0.00205362	8	9.67792	0.207572	26.6648	2.41988e-07	7.95193	1.08639
MRS_High		all	-0.117274	0.0424664	-2.76157	0.00575242	-0.200507	-0.0340413	0.0018034	8	29.024	0.000143235	7.62627	0.00575242	75.882	4.14629	-0.178931	0.0985147	-1.81628	0.0693267	-0.372016	0.0141545	0.00970515	0.0593251	0.0412616	8	29.024	0.000143235	3.29889	0.0693267	79.8729	4.96843
MRS_Moderate		all	-0.063245	0.0202026	-3.13054	0.00174484	-0.102841	-0.0236487	0.000408143	8	6.8035	0.449622	9.80029	0.00174484	0	0.971928	-0.0632458	0.0202077	-3.12979	0.0017493	-0.102852	-0.0236395	0.000408349	1.37405e-06	0.00166105	8	6.8035	0.449622	9.7956	0.0017493	0.0408771	1.00041
PhenoAgeAccel		all	-0.00516728	0.0014154	-3.65076	0.000261461	-0.00794141	-0.00239315	2.00335e-06	8	5.79759	0.563573	13.3281	0.000261461	0	0.828227	-0.00516728	0.0014154	-3.65076	0.000261461	-0.00794141	-0.00239315	2.00335e-06	0	7.93947e-06	8	5.79759	0.563573	13.3281	0.000261461	0	1
EEAA		EA	-0.00743298	0.00205424	-3.61836	0.000296478	-0.0114592	-0.00340674	4.21991e-06	5	10.6529	0.0307553	13.0925	0.000296478	62.4514	2.66321	-0.00866688	0.00397875	-2.17829	0.0293841	-0.0164651	-0.000868681	1.58304e-05	5.13923e-05	5.58252e-05	5	10.6529	0.0307553	4.74497	0.0293841	67.5266	3.07944
GrimAgeAccel		EA	-0.00666058	0.00237322	-2.80655	0.00500744	-0.011312	-0.00200915	5.63219e-06	5	12.9267	0.0116395	7.87675	0.00500744	69.0563	3.23168	-0.00561775	0.00542857	-1.03485	0.30074	-0.0162576	0.00502206	2.94694e-05	0.000103303	0.000103841	5	12.9267	0.0116395	1.07091	0.30074	74.3408	3.89724
HannumAgeAccel		EA	-0.00558129	0.00213031	-2.61994	0.00879451	-0.00975662	-0.00140596	4.53823e-06	5	1.00335	0.909287	6.86409	0.00879451	0	0.250838	-0.00558129	0.00213031	-2.61994	0.00879451	-0.00975662	-0.00140596	4.53823e-06	0	1.53792e-05	5	1.00335	0.909287	6.86409	0.00879451	0	1
HorvathAgeAccel		EA	-0.00803321	0.0021328	-3.76651	0.000165548	-0.0122134	-0.003853	4.54885e-06	5	5.30873	0.257061	14.1866	0.000165548	24.6524	1.32718	-0.00735812	0.00260612	-2.8234	0.00475178	-0.012466	-0.00225021	6.79187e-06	9.41414e-06	2.35926e-05	5	5.30873	0.257061	7.97157	0.00475178	27.9056	1.38707
IEAA		EA	-0.00544177	0.0024366	-2.23334	0.0255265	-0.0102174	-0.00066611	5.93704e-06	5	1.73488	0.784373	4.98781	0.0255265	0	0.433719	-0.00544177	0.0024366	-2.23334	0.0255265	-0.0102174	-0.00066611	5.93704e-06	0	2.04164e-05	5	1.73488	0.784373	4.98781	0.0255265	0	1
MRS_continuous		EA	-0.0931486	0.0269063	-3.46197	0.000536242	-0.145884	-0.0404133	0.000723947	5	4.8408	0.304025	11.9852	0.000536242	17.3691	1.2102	-0.0909152	0.0288429	-3.15208	0.00162113	-0.147446	-0.0343841	0.000831914	0.000484433	0.00290424	5	4.8408	0.304025	9.9356	0.00162113	11.4669	1.12952
MRS_High		EA	-0.143001	0.0504427	-2.83491	0.00458383	-0.241866	-0.0441347	0.00254447	5	12.7966	0.0123135	8.03673	0.00458383	68.7418	3.19916	-0.164518	0.0969299	-1.69729	0.089642	-0.354497	0.025461	0.0093954	0.0324613	0.0330941	5	12.7966	0.0123135	2.88079	0.089642	71.0568	3.45504
MRS_Moderate		EA	-0.0383567	0.0259659	-1.4772	0.139623	-0.089249	0.0125355	0.000674227	5	2.30197	0.680411	2.18211	0.139623	0	0.575491	-0.0383567	0.0259659	-1.4772	0.139623	-0.089249	0.0125355	0.000674227	0	0.00234042	5	2.30197	0.680411	2.18211	0.139623	0	1
PhenoAgeAccel		EA	-0.00535363	0.00174275	-3.07195	0.00212668	-0.00876936	-0.00193791	3.03717e-06	5	5.35069	0.253169	9.43686	0.00212668	25.2433	1.33767	-0.00476408	0.00213851	-2.22775	0.0258971	-0.00895549	-0.000572668	4.57324e-06	6.11408e-06	1.57432e-05	5	5.35069	0.253169	4.96288	0.0258971	26.9234	1.36843
EEAA		AA	-0.0106632	0.00349348	-3.05232	0.0022708	-0.0175103	-0.00381612	1.22044e-05	2	1.06313	0.302502	9.31666	0.0022708	5.93835	1.06313	-0.0106365	0.00360531	-2.95022	0.00317549	-0.0177027	-0.00357018	1.29983e-05	1.56509e-06	3.72726e-05	2	1.06313	0.302502	8.70379	0.00317549	5.93835	1.06313
GrimAgeAccel		AA	-0.00271149	0.00440715	-0.615248	0.538391	-0.0113494	0.00592637	1.9423e-05	2	2.48015	0.115291	0.37853	0.538391	59.6799	2.48015	-0.00128027	0.0072793	-0.175878	0.86039	-0.0155474	0.0129869	5.29882e-05	6.43626e-05	0.000152518	2	2.48015	0.115291	0.0309331	0.86039	59.6799	2.48015
HannumAgeAccel		AA	-0.0125652	0.0041764	-3.00863	0.00262432	-0.0207508	-0.00437963	1.74423e-05	2	0.278398	0.597753	9.05183	0.00262432	0	0.278398	-0.0125652	0.0041764	-3.00863	0.00262432	-0.0207508	-0.00437963	1.74423e-05	0	5.14203e-05	2	0.278398	0.597753	9.05183	0.00262432	0	1
HorvathAgeAccel		AA	-0.00262474	0.00344362	-0.762203	0.445939	-0.0093741	0.00412463	1.18585e-05	2	3.3348	0.0678287	0.580954	0.445939	70.0132	3.3348	-0.00284304	0.00629557	-0.451594	0.651562	-0.0151821	0.00949605	3.96342e-05	5.55105e-05	0.000112127	2	3.3348	0.0678287	0.203937	0.651562	70.0132	3.3348
IEAA		AA	-0.00163084	0.00388684	-0.419582	0.674791	-0.0092489	0.00598721	1.51075e-05	2	4.57256	0.0324881	0.176049	0.674791	78.1304	4.57256	-0.00358169	0.00866119	-0.413534	0.679216	-0.0205573	0.0133939	7.50163e-05	0.000117687	0.000213021	2	4.57256	0.0324881	0.17101	0.679216	78.1304	4.57256
MRS_continuous		AA	-0.138461	0.0375581	-3.68658	0.000227292	-0.212073	-0.0648482	0.00141061	2	1.07346	0.300165	13.5908	0.000227292	6.84327	1.07346	-0.137581	0.039193	-3.51033	0.000447543	-0.214397	-0.0607637	0.00153609	0.000229881	0.00475067	2	1.07346	0.300165	12.3224	0.000447543	6.84327	1.07346
MRS_High		AA	0.0639851	0.0848593	0.754014	0.450841	-0.102336	0.230306	0.00720109	2	1.38293	0.239603	0.568537	0.450841	27.6898	1.38293	0.0493473	0.106264	0.464386	0.642371	-0.158926	0.25762	0.011292	0.00706264	0.0360714	2	1.38293	0.239603	0.215654	0.642371	27.6898	1.38293
MRS_Moderate		AA	-0.0823067	0.0349383	-2.35578	0.018484	-0.150784	-0.013829	0.00122068	2	0.214543	0.64323	5.54969	0.018484	0	0.214543	-0.0823067	0.0349383	-2.35578	0.018484	-0.150784	-0.013829	0.00122068	0	0.00403543	2	0.214543	0.64323	5.54969	0.018484	0	1
PhenoAgeAccel		AA	-0.00431809	0.00261791	-1.64944	0.099057	-0.00944909	0.000812916	6.85344e-06	2	0.167208	0.682605	2.72066	0.099057	0	0.167208	-0.00431809	0.00261791	-1.64944	0.099057	-0.00944909	0.000812916	6.85344e-06	0	1.96262e-05	2	0.167208	0.682605	2.72066	0.099057	0	1
			Fixed effects meta-analysis (IVW)														Random effects meta-analysis (REML)
clock	trait	group	beta_FE	se_FE	zval_FE	pval_FE	ci.lb_FE	ci.ub_FE	vb_FE	k_FE	QE_FE	QEp_FE	QM_FE	QMp_FE	I2_FE	H2_FE	beta_RE	se_RE	zval_RE	pval_RE	ci.lb_RE	ci.ub_RE	vb_RE	tau2_RE	se.tau2_RE	k_RE	QE_RE	QEp_RE	QM_RE	QMp_RE	I2_RE	H2_RE
EEAA	UACR	all	0.0125293	0.00248518	5.04159	4.61683e-07	0.00765839	0.0174001	6.17612e-06	4	0.119193	0.989439	25.4176	4.61683e-07	0	0.039731	0.0125293	0.00248518	5.04159	4.61683e-07	0.00765839	0.0174001	6.17612e-06	0	2.25409e-05	4	0.119193	0.989439	25.4176	4.61683e-07	0	1
GrimAgeAccel		all	0.0291286	0.00409066	7.12077	1.07329e-12	0.0211111	0.0371461	1.67335e-05	4	3.23345	0.357013	50.7053	1.07329e-12	7.21981	1.07782	0.0289685	0.0043562	6.64995	2.93196e-11	0.0204305	0.0375065	1.89764e-05	7.87138e-06	6.28136e-05	4	3.23345	0.357013	44.2218	2.93196e-11	10.0144	1.11129
HannumAgeAccel		all	0.0144907	0.00305077	4.74986	2.03554e-06	0.00851134	0.0204701	9.30719e-06	4	0.260152	0.96734	22.5612	2.03554e-06	0	0.0867175	0.0144907	0.00305077	4.74986	2.03554e-06	0.00851134	0.0204701	9.30719e-06	0	3.55429e-05	4	0.260152	0.96734	22.5612	2.03554e-06	0	1
HorvathAgeAccel		all	0.00159661	0.00309609	0.515686	0.606074	-0.00447161	0.00766483	9.58576e-06	4	1.72286	0.631864	0.265932	0.606074	0	0.574286	0.00159661	0.00309609	0.515686	0.606074	-0.00447161	0.00766483	9.58576e-06	0	3.30456e-05	4	1.72286	0.631864	0.265932	0.606074	0	1
IEAA		all	0.00205263	0.00325758	0.63011	0.528622	-0.0043321	0.00843737	1.06118e-05	4	0.809245	0.847254	0.397039	0.528622	0	0.269748	0.00205263	0.00325758	0.63011	0.528622	-0.0043321	0.00843737	1.06118e-05	0	3.73838e-05	4	0.809245	0.847254	0.397039	0.528622	0	1
MRS_continuous		all	0.251767	0.036995	6.80544	1.00743e-11	0.179258	0.324276	0.00136863	4	12.567	0.00567295	46.314	1.00743e-11	76.128	4.18901	0.24809	0.0757771	3.27394	0.00106059	0.0995692	0.39661	0.00574216	0.0173354	0.0187541	4	12.567	0.00567295	10.7187	0.00106059	75.7504	4.12378
MRS_High		all	0.430697	0.0731992	5.8839	4.00716e-09	0.287229	0.574165	0.00535813	4	1.29399	0.730561	34.6203	4.00716e-09	0	0.43133	0.430697	0.0731992	5.8839	4.00716e-09	0.287229	0.574165	0.00535813	0	0.0169761	4	1.29399	0.730561	34.6203	4.00716e-09	0	1
MRS_Moderate		all	0.102379	0.0339909	3.01196	0.00259565	0.0357584	0.169	0.00115538	4	1.22527	0.746951	9.07191	0.00259565	0	0.408422	0.102379	0.0339909	3.01196	0.00259565	0.0357584	0.169	0.00115538	0	0.00382079	4	1.22527	0.746951	9.07191	0.00259565	0	1
PhenoAgeAccel		all	0.0102453	0.00244124	4.19676	2.70761e-05	0.00546055	0.01503	5.95964e-06	4	1.05874	0.787042	17.6128	2.70761e-05	0	0.352914	0.0102453	0.00244124	4.19676	2.70761e-05	0.00546055	0.01503	5.95964e-06	0	2.18892e-05	4	1.05874	0.787042	17.6128	2.70761e-05	0	1
EEAA		EA	0.0123654	0.00264246	4.67952	2.87544e-06	0.00718632	0.0175446	6.98259e-06	3	0.085918	0.957951	21.8979	2.87544e-06	0	0.042959	0.0123654	0.00264246	4.67952	2.87544e-06	0.00718632	0.0175446	6.98259e-06	0	2.53896e-05	3	0.085918	0.957951	21.8979	2.87544e-06	0	1
GrimAgeAccel		EA	0.0323869	0.00450702	7.18586	6.67843e-13	0.0235532	0.0412205	2.03133e-05	3	0.267866	0.874649	51.6366	6.67843e-13	0	0.133933	0.0323869	0.00450702	7.18586	6.67843e-13	0.0235532	0.0412205	2.03133e-05	0	6.42944e-05	3	0.267866	0.874649	51.6366	6.67843e-13	0	1
HannumAgeAccel		EA	0.0144786	0.00322639	4.48756	7.20442e-06	0.00815501	0.0208022	1.04096e-05	3	0.260019	0.878087	20.1382	7.20442e-06	0	0.13001	0.0144786	0.00322639	4.48756	7.20442e-06	0.00815501	0.0208022	1.04096e-05	0	4.03017e-05	3	0.260019	0.878087	20.1382	7.20442e-06	0	1
HorvathAgeAccel		EA	0.00016867	0.00335286	0.0503063	0.959878	-0.00640282	0.00674016	1.12417e-05	3	0.491508	0.782115	0.00253073	0.959878	0	0.245754	0.00016867	0.00335286	0.0503063	0.959878	-0.00640282	0.00674016	1.12417e-05	0	3.77264e-05	3	0.491508	0.782115	0.00253073	0.959878	0	1
IEAA		EA	0.00125153	0.00353905	0.353635	0.723612	-0.00568488	0.00818795	1.25249e-05	3	0.47378	0.789078	0.125058	0.723612	0	0.23689	0.00125153	0.00353905	0.353635	0.723612	-0.00568488	0.00818795	1.25249e-05	0	4.40085e-05	3	0.47378	0.789078	0.125058	0.723612	0	1
MRS_continuous		EA	0.320527	0.0426429	7.51653	5.62492e-14	0.236948	0.404105	0.00181842	3	2.05568	0.357778	56.4982	5.62492e-14	2.70873	1.02784	0.320423	0.0430419	7.44444	9.73552e-14	0.236063	0.404784	0.00185261	9.74479e-05	0.00564608	3	2.05568	0.357778	55.4197	9.73552e-14	1.70873	1.01738
MRS_High		EA	0.451031	0.0755309	5.97147	2.35131e-09	0.302993	0.599068	0.00570492	3	0.101763	0.950391	35.6584	2.35131e-09	0	0.0508817	0.451031	0.0755309	5.97147	2.35131e-09	0.302993	0.599068	0.00570492	0	0.0172995	3	0.101763	0.950391	35.6584	2.35131e-09	0	1
MRS_Moderate		EA	0.121684	0.0382854	3.17835	0.00148118	0.0466463	0.196722	0.00146577	3	0.0245813	0.987785	10.1019	0.00148118	0	0.0122907	0.121684	0.0382854	3.17835	0.00148118	0.0466463	0.196722	0.00146577	0	0.00462984	3	0.0245813	0.987785	10.1019	0.00148118	0	1
PhenoAgeAccel		EA	0.0111685	0.00264556	4.22158	2.42594e-05	0.00598325	0.0163537	6.99899e-06	3	0.238775	0.887464	17.8217	2.42594e-05	0	0.119387	0.0111685	0.00264556	4.22158	2.42594e-05	0.00598325	0.0163537	6.99899e-06	0	2.66764e-05	3	0.238775	0.887464	17.8217	2.42594e-05	0	1
			Fixed effects meta-analysis (IVW)														Random effects meta-analysis (REML)
clock	trait	group	beta_FE	se_FE	zval_FE	pval_FE	ci.lb_FE	ci.ub_FE	vb_FE	k_FE	QE_FE	QEp_FE	QM_FE	QMp_FE	I2_FE	H2_FE	beta_RE	se_RE	zval_RE	pval_RE	ci.lb_RE	ci.ub_RE	vb_RE	tau2_RE	se.tau2_RE	k_RE	QE_RE	QEp_RE	QM_RE	QMp_RE	I2_RE	H2_RE
EEAA	urate	all	0.00737624	0.00180489	4.08681	4.37349e-05	0.00383872	0.0109138	3.25763e-06	5	6.84903	0.144085	16.702	4.37349e-05	41.5976	1.71226	0.00759621	0.00215439	3.52591	0.000422027	0.00337367	0.0118187	4.64142e-06	4.37246e-06	1.55754e-05	5	6.84903	0.144085	12.4321	0.000422027	18.0347	1.22003
GrimAgeAccel		all	0.00863607	0.00224118	3.85335	0.000116512	0.00424343	0.0130287	5.0229e-06	5	9.15472	0.0573464	14.8483	0.000116512	56.3067	2.28868	0.0100473	0.00396018	2.53709	0.0111778	0.00228552	0.0178091	1.5683e-05	3.98551e-05	5.25255e-05	5	9.15472	0.0573464	6.43682	0.0111778	56.9954	2.32533
HannumAgeAccel		all	0.00508024	0.00199373	2.54811	0.0108308	0.0011726	0.00898787	3.97495e-06	5	0.941372	0.918552	6.49287	0.0108308	0	0.235343	0.00508024	0.00199373	2.54811	0.0108308	0.0011726	0.00898787	3.97495e-06	0	1.33137e-05	5	0.941372	0.918552	6.49287	0.0108308	0	1
HorvathAgeAccel		all	0.00310895	0.00199985	1.5546	0.120042	-0.00081067	0.00702858	3.99938e-06	5	3.66651	0.453015	2.41677	0.120042	0	0.916628	0.00319336	0.00232099	1.37586	0.168864	-0.00135569	0.00774241	5.38698e-06	5.3002e-06	1.78859e-05	5	3.66651	0.453015	1.893	0.168864	19.5016	1.24226
IEAA		all	-0.000905816	0.00216161	-0.419047	0.675182	-0.0051425	0.00333086	4.67256e-06	5	1.66389	0.797266	0.1756	0.675182	0	0.415973	-0.000905816	0.00216161	-0.419047	0.675182	-0.0051425	0.00333086	4.67256e-06	0	1.55797e-05	5	1.66389	0.797266	0.1756	0.675182	0	1
MRS_continuous		all	0.114555	0.0241399	4.74547	2.08018e-06	0.0672418	0.161868	0.000582733	5	4.55364	0.336234	22.5195	2.08018e-06	12.1583	1.13841	0.114557	0.02415	4.74354	2.10016e-06	0.0672234	0.16189	0.000583224	1.95544e-06	0.00193666	5	4.55364	0.336234	22.5012	2.10016e-06	0.0627507	1.00063
MRS_High		all	0.117385	0.0501827	2.33915	0.0193275	0.0190287	0.215741	0.00251831	5	7.23953	0.123759	5.47163	0.0193275	44.7478	1.80988	0.131734	0.0753083	1.74927	0.0802449	-0.0158672	0.279336	0.00567134	0.012654	0.0193806	5	7.23953	0.123759	3.05994	0.0802449	47.6906	1.9117
MRS_Moderate		all	0.0748525	0.0232921	3.21364	0.00131063	0.0292008	0.120504	0.000542522	5	4.89268	0.298488	10.3275	0.00131063	18.2452	1.22317	0.0743285	0.0269089	2.76223	0.00574089	0.021588	0.127069	0.000724091	0.000712219	0.00240276	5	4.89268	0.298488	7.62989	0.00574089	19.5456	1.24294
PhenoAgeAccel		all	0.00867417	0.00158813	5.46189	4.7109e-08	0.0055615	0.0117868	2.52215e-06	5	3.81278	0.431936	29.8322	4.7109e-08	0	0.953194	0.00854535	0.00176479	4.84213	1.28457e-06	0.00508642	0.0120043	3.1145e-06	2.12617e-06	1.03383e-05	5	3.81278	0.431936	23.4462	1.28457e-06	13.0636	1.15027
EEAA		EA	0.00841193	0.00203677	4.13003	3.62708e-05	0.00441994	0.0124039	4.14843e-06	4	5.64489	0.130225	17.0572	3.62708e-05	46.8546	1.88163	0.00928511	0.00295746	3.13955	0.00169206	0.00348859	0.0150816	8.74658e-06	1.12713e-05	2.82401e-05	4	5.64489	0.130225	9.85679	0.00169206	31.8681	1.46774
GrimAgeAccel		EA	0.0078375	0.00246206	3.18331	0.001456	0.00301195	0.012663	6.06172e-06	4	8.54084	0.0360616	10.1335	0.001456	64.8746	2.84695	0.0095089	0.00517583	1.83718	0.0661839	-0.000635529	0.0196533	2.67892e-05	6.0265e-05	8.39855e-05	4	8.54084	0.0360616	3.37522	0.0661839	64.9604	2.85391
HannumAgeAccel		EA	0.00561666	0.00216723	2.59163	0.0095522	0.00136897	0.00986435	4.69689e-06	4	0.542791	0.909395	6.71655	0.0095522	0	0.18093	0.00561666	0.00216723	2.59163	0.0095522	0.00136897	0.00986435	4.69689e-06	0	1.49657e-05	4	0.542791	0.909395	6.71655	0.0095522	0	1
HorvathAgeAccel		EA	0.00408375	0.00223661	1.82587	0.0678705	-0.000299926	0.00846743	5.00243e-06	4	2.71917	0.436979	3.33378	0.0678705	0	0.90639	0.0043722	0.0028931	1.51125	0.130724	-0.00129817	0.0100426	8.37003e-06	9.83479e-06	2.60093e-05	4	2.71917	0.436979	2.28388	0.130724	29.6257	1.42097
IEAA		EA	-0.000934831	0.00245779	-0.380355	0.703682	-0.00575201	0.00388234	6.04072e-06	4	1.66327	0.645129	0.14467	0.703682	0	0.554425	-0.000934831	0.00245779	-0.380355	0.703682	-0.00575201	0.00388234	6.04072e-06	0	1.93225e-05	4	1.66327	0.645129	0.14467	0.703682	0	1
MRS_continuous		EA	0.124065	0.0292698	4.23867	2.24846e-05	0.0666973	0.181433	0.000856721	4	4.22356	0.238314	17.9663	2.24846e-05	28.9698	1.40785	0.124198	0.0349738	3.55117	0.000383526	0.0556505	0.192745	0.00122317	0.0011522	0.00379285	4	4.22356	0.238314	12.6108	0.000383526	23.2943	1.30368
MRS_High		EA	0.147524	0.0557793	2.64478	0.00817451	0.0381983	0.256849	0.00311133	4	5.70782	0.126724	6.99484	0.00817451	47.4405	1.90261	0.174257	0.0897961	1.94058	0.0523087	-0.00174018	0.350254	0.00806334	0.0152934	0.0258591	4	5.70782	0.126724	3.76587	0.0523087	51.0631	2.04345
MRS_Moderate		EA	0.0784705	0.027582	2.84499	0.00444123	0.0244109	0.13253	0.000760764	4	4.8327	0.184466	8.09399	0.00444123	37.9229	1.6109	0.0758176	0.040972	1.85048	0.0642451	-0.00448596	0.156121	0.0016787	0.00280743	0.00522679	4	4.8327	0.184466	3.42426	0.0642451	44.469	1.8008
PhenoAgeAccel		EA	0.00845887	0.00179311	4.71742	2.38851e-06	0.00494443	0.0119733	3.21525e-06	4	3.74589	0.290243	22.2541	2.38851e-06	19.9123	1.24863	0.00819756	0.00213294	3.84331	0.000121385	0.00401707	0.012378	4.54944e-06	3.58492e-06	1.42936e-05	4	3.74589	0.290243	14.7711	0.000121385	18.4593	1.22638
			0.0291779	0.0638152
3.2. Logistic regression models		1.04759	1.02961	1.0659
Meta-analysis of Model 2: binary kidney trait ~ DNAm predictor + chronological age + sex + BMI + log-transformed triglycerides + HDL + hypertension + smoking status + diabetes
			Fixed effects meta-analysis (IVW)																	Random effects meta-analysis (REML)
clock	trait	group	beta_FE	se_FE	zval_FE	pval_FE	ci.lb_FE	ci.ub_FE	OR_FE	OR_lb_FE	OR_ub_FE	vb_FE	k_FE	QE_FE	QEp_FE	QM_FE	QMp_FE	I2_FE	H2_FE	beta_RE	se_RE	zval_RE	pval_RE	ci.lb_RE	ci.ub_RE	OR_RE	OR_lb_RE	OR_ub_RE	vb_RE	tau2_RE	se.tau2_RE	tau2.f_RE	k_RE	QE_RE	QEp_RE	QM_RE	QMp_RE	I2_RE	H2_RE
HorvathAgeAccel	CKD	all	0.0184444	0.00763505	2.41576	0.0157025	0.00348001	0.0334089	1.01862	1.00349	1.03397	5.8294e-05	8	8.10772	0.323191	5.83588	0.0157025	13.6625	1.15825	0.0160829	0.00906789	1.77361	0.0761273	-0.00168982	0.0338557	1.01621	0.998311	1.03444	8.22266e-05	0.000124411	0.000329797	0.000124411	8	8.10772	0.323191	3.1457	0.0761273	19.1148	1.23632
HannumAgeAccel		all	0.0323097	0.00822463	3.92841	8.5509e-05	0.0161898	0.0484297	1.03284	1.01632	1.04962	6.76446e-05	8	12.7037	0.0796664	15.4324	8.5509e-05	44.8978	1.81481	0.0352854	0.0118375	2.98082	0.00287474	0.0120844	0.0584865	1.03592	1.01216	1.06023	0.000140126	0.000439177	0.000575861	0.000439177	8	12.7037	0.0796664	8.88531	0.00287474	42.2246	1.73084
GrimAgeAccel		all	0.0265648	0.00824326	3.22261	0.00127029	0.0104083	0.0427213	1.02692	1.01046	1.04365	6.79513e-05	8	31.4096	5.22377e-05	10.3852	0.00127029	77.7138	4.48709	0.0556717	0.0230571	2.41452	0.015756	0.0104807	0.100863	1.05725	1.01053	1.10613	0.000531628	0.00296629	0.00224587	0.00296629	8	31.4096	5.22377e-05	5.82991	0.015756	77.6003	4.46435
PhenoAgeAccel		all	0.0302185	0.0064871	4.65825	3.18916e-06	0.017504	0.042933	1.03068	1.01766	1.04387	4.20824e-05	8	10.5876	0.157649	21.6992	3.18916e-06	33.8847	1.51251	0.0290076	0.00867545	3.34364	0.000826871	0.012004	0.0460112	1.02943	1.01208	1.04709	7.52635e-05	0.000209251	0.000308598	0.000209251	8	10.5876	0.157649	11.1799	0.000826871	36.6971	1.57971
EEAA		all	0.0376645	0.00810994	4.64423	3.41343e-06	0.0217693	0.0535597	1.03838	1.02201	1.05502	6.57712e-05	8	13.8989	0.053009	21.5689	3.41343e-06	49.6363	1.98556	0.0386939	0.0117785	3.28513	0.00101934	0.0156085	0.0617793	1.03945	1.01573	1.06373	0.000138733	0.000518841	0.000579863	0.000518841	8	13.8989	0.053009	10.7921	0.00101934	48.7782	1.95229
MRS_continuous		all	0.578944	0.097325	5.94856	2.70515e-09	0.38819	0.769697	1.78415	1.4743	2.15912	0.00947216	8	22.0787	0.00246222	35.3853	2.70515e-09	68.2953	3.1541	0.649552	0.191406	3.39358	0.000689849	0.274403	1.0247	1.91468	1.31574	2.78628	0.0366363	0.192434	0.154659	0.192434	8	22.0787	0.00246222	11.5164	0.000689849	70.0477	3.33864
IEAA		all	0.00715014	0.00900437	0.794075	0.427152	-0.0104981	0.0247984	1.00718	0.989557	1.02511	8.10786e-05	8	7.16954	0.411443	0.630555	0.427152	2.36479	1.02422	0.00715014	0.00900437	0.794075	0.427152	-0.0104981	0.0247984	1.00718	0.989557	1.02511	8.10786e-05	0	0.000319218	0	8	7.16954	0.411443	0.630555	0.427152	0	1
MRS_Moderate		all	0.204153	0.084505	2.41587	0.0156977	0.0385262	0.36978	1.22649	1.03927	1.44742	0.00714109	8	7.67416	0.362201	5.83642	0.0156977	8.78481	1.09631	0.204159	0.0845092	2.41582	0.0157	0.0385236	0.369794	1.22649	1.03927	1.44744	0.00714181	4.25431e-06	0.0280198	4.25431e-06	8	7.67416	0.362201	5.83616	0.0157	0.00707473	1.00007
MRS_High		all	0.323921	0.13412	2.41515	0.0157286	0.06105	0.586792	1.38254	1.06295	1.79822	0.0179882	8	16.1755	0.0235607	5.83296	0.0157286	56.7246	2.31078	0.500748	0.23146	2.16344	0.0305077	0.0470955	0.954401	1.64996	1.04821	2.59714	0.0535736	0.184874	0.209594	0.184874	8	16.1755	0.0235607	4.68045	0.0305077	52.584	2.10899
HorvathAgeAccel		EA	0.0228625	0.00853546	2.67853	0.00739463	0.00613328	0.0395917	1.02313	1.00615	1.04039	7.28541e-05	5	3.80783	0.432637	7.17452	0.00739463	0	0.951958	0.0228625	0.00853546	2.67853	0.00739463	0.00613328	0.0395917	1.02313	1.00615	1.04039	7.28541e-05	0	0.000268553	0	5	3.80783	0.432637	7.17452	0.00739463	0	1
HannumAgeAccel		EA	0.0222915	0.00924068	2.41233	0.0158511	0.00418014	0.0404029	1.02254	1.00419	1.04123	8.53901e-05	5	5.43468	0.245532	5.81932	0.0158511	26.3985	1.35867	0.0222909	0.00924349	2.41153	0.0158859	0.00417402	0.0404079	1.02254	1.00418	1.04124	8.54422e-05	1.67373e-07	0.000301877	1.67373e-07	5	5.43468	0.245532	5.81546	0.0158859	0.0337475	1.00034
GrimAgeAccel		EA	0.0176369	0.00884445	1.99412	0.0461395	0.000302048	0.0349717	1.01779	1.0003	1.03559	7.82243e-05	5	22.073	0.000193825	3.97649	0.0461395	81.8783	5.51825	0.0377848	0.0316281	1.19466	0.232221	-0.0242052	0.0997747	1.03851	0.976084	1.10492	0.00100034	0.00400203	0.00353215	0.00400203	5	22.073	0.000193825	1.42721	0.232221	84.3314	6.38217
PhenoAgeAccel		EA	0.0288539	0.00762223	3.7855	0.000153402	0.0139146	0.0437932	1.02927	1.01401	1.04477	5.80984e-05	5	10.09	0.0389386	14.33	0.000153402	60.3568	2.5225	0.0247475	0.0134466	1.84042	0.0657065	-0.00160746	0.0511024	1.02506	0.998393	1.05243	0.000180812	0.000530685	0.000635081	0.000530685	5	10.09	0.0389386	3.38715	0.0657065	61.8484	2.62112
EEAA		EA	0.0271474	0.00952429	2.85034	0.00436732	0.00848015	0.0458147	1.02752	1.00852	1.04688	9.0712e-05	5	7.00501	0.135624	8.12441	0.00436732	42.898	1.75125	0.0267087	0.0128237	2.08277	0.0372723	0.00157481	0.0518426	1.02707	1.00158	1.05321	0.000164446	0.000341061	0.000579717	0.000341061	5	7.00501	0.135624	4.33793	0.0372723	41.9047	1.72131
MRS_continuous		EA	0.419825	0.112361	3.73638	0.000186685	0.199601	0.640049	1.5217	1.22091	1.89658	0.0126251	5	6.83043	0.145125	13.9606	0.000186685	41.4386	1.70761	0.431788	0.156269	2.76311	0.00572526	0.125507	0.738069	1.54001	1.13372	2.0919	0.0244199	0.0481577	0.0860024	0.0481577	5	6.83043	0.145125	7.6348	0.00572526	40.1799	1.67168
IEAA		EA	0.00942091	0.01015	0.928169	0.35332	-0.0104727	0.0293146	1.00947	0.989582	1.02975	0.000103023	5	3.69748	0.448493	0.861497	0.35332	0	0.92437	0.00940583	0.0101686	0.924992	0.35497	-0.0105242	0.0293358	1.00945	0.989531	1.02977	0.000103399	1.26106e-06	0.000368193	1.26106e-06	5	3.69748	0.448493	0.855611	0.35497	0.214004	1.00214
MRS_Moderate		EA	0.128314	0.0928443	1.38204	0.16696	-0.0536572	0.310286	1.13691	0.947754	1.36382	0.00862006	5	2.37125	0.667829	1.91003	0.16696	0	0.592813	0.128314	0.0928443	1.38204	0.16696	-0.0536572	0.310286	1.13691	0.947754	1.36382	0.00862006	0	0.0298479	0	5	2.37125	0.667829	1.91003	0.16696	0	1
MRS_High		EA	0.281543	0.139141	2.02344	0.0430279	0.00883204	0.554254	1.32517	1.00887	1.74065	0.0193602	5	8.48252	0.0754189	4.09431	0.0430279	52.8442	2.12063	0.389935	0.231086	1.6874	0.0915263	-0.0629856	0.842856	1.47689	0.938949	2.32301	0.0534009	0.137459	0.183503	0.137459	5	8.48252	0.0754189	2.84732	0.0915263	56.0629	2.27598
HorvathAgeAccel		AA	-0.00533037	0.0182567	-0.291968	0.770311	-0.0411128	0.030452	0.994684	0.95972	1.03092	0.000333306	2	2.06929	0.150292	0.0852456	0.770311	51.6742	2.06929	-0.0059203	0.0262813	-0.225267	0.821772	-0.0574306	0.04559	0.994097	0.944186	1.04665	0.000690705	0.000714147	0.00195447	0.000714147	2	2.06929	0.150292	0.0507452	0.821772	51.6742	2.06929
HannumAgeAccel		AA	0.0662075	0.0195589	3.38504	0.000711687	0.0278728	0.104542	1.06845	1.02826	1.1102	0.000382549	2	1.29049	0.255958	11.4585	0.000711687	22.51	1.29049	0.0656243	0.0222791	2.94556	0.00322372	0.0219581	0.10929	1.06783	1.0222	1.11549	0.000496357	0.000225274	0.00141531	0.000225274	2	1.29049	0.255958	8.67631	0.00322372	22.51	1.29049
GrimAgeAccel		AA	0.0751998	0.0243251	3.09145	0.00199182	0.0275235	0.122876	1.0781	1.0279	1.13075	0.00059171	2	0.116318	0.733063	9.55706	0.00199182	0	0.116318	0.0751998	0.0243251	3.09145	0.00199182	0.0275235	0.122876	1.0781	1.0279	1.13075	0.00059171	0	0.00182607	0	2	0.116318	0.733063	9.55706	0.00199182	0	1
PhenoAgeAccel		AA	0.0315754	0.0132297	2.38671	0.0170001	0.00564566	0.0575051	1.03208	1.00566	1.05919	0.000175025	2	0.159306	0.689796	5.69636	0.0170001	0	0.159306	0.0315754	0.0132297	2.38671	0.0170001	0.00564566	0.0575051	1.03208	1.00566	1.05919	0.000175025	0	0.000523428	0	2	0.159306	0.689796	5.69636	0.0170001	0	1
EEAA		AA	0.0604353	0.0164136	3.68203	0.000231382	0.0282653	0.0926053	1.0623	1.02867	1.09703	0.000269405	2	1.64295	0.199921	13.5574	0.000231382	39.1338	1.64295	0.0582651	0.0214937	2.7108	0.00671205	0.0161383	0.100392	1.06	1.01627	1.10561	0.000461978	0.000370496	0.0013389	0.000370496	2	1.64295	0.199921	7.34845	0.00671205	39.1338	1.64295
MRS_continuous		AA	0.924713	0.2073	4.46076	8.16709e-06	0.518413	1.33101	2.52114	1.67935	3.7849	0.0429731	2	3.74967	0.052818	19.8983	8.16709e-06	73.331	3.74967	0.822306	0.423379	1.94225	0.0521074	-0.00750182	1.65211	2.27574	0.992511	5.21808	0.17925	0.264926	0.510919	0.264926	2	3.74967	0.052818	3.77232	0.0521074	73.331	3.74967
IEAA		AA	-0.00264738	0.0207914	-0.127331	0.898679	-0.0433978	0.038103	0.997356	0.95753	1.03884	0.000432282	2	3.19872	0.073696	0.0162131	0.898679	68.7375	3.19872	-0.00172746	0.0372071	-0.0464282	0.962969	-0.074652	0.071197	0.998274	0.928065	1.07379	0.00138437	0.0019034	0.00391607	0.0019034	2	3.19872	0.073696	0.00215558	0.962969	68.7375	3.19872
MRS_Moderate		AA	0.473872	0.223286	2.12226	0.033816	0.0362382	0.911505	1.6062	1.03689	2.48808	0.0498568	2	0.284243	0.593934	4.50398	0.033816	0	0.284243	0.473872	0.223286	2.12226	0.033816	0.0362382	0.911505	1.6062	1.03689	2.48808	0.0498568	0	0.141799	0	2	0.284243	0.593934	4.50398	0.033816	0	1
MRS_High		AA	0.353156	0.545497	0.647402	0.517372	-0.715999	1.42231	1.42355	0.488694	4.14677	0.297567	2	0.0474237	0.827608	0.419129	0.517372	0	0.0474237	0.353156	0.545497	0.647402	0.517372	-0.715999	1.42231	1.42355	0.488694	4.14677	0.297567	0	0.85183	0	2	0.0474237	0.827608	0.419129	0.517372	0	1
			Fixed effects meta-analysis (IVW)																	Random effects meta-analysis (REML)
clock	trait	group	beta_FE	se_FE	zval_FE	pval_FE	ci.lb_FE	ci.ub_FE	OR_FE	OR_lb_FE	OR_ub_FE	vb_FE	k_FE	QE_FE	QEp_FE	QM_FE	QMp_FE	I2_FE	H2_FE	beta_RE	se_RE	zval_RE	pval_RE	ci.lb_RE	ci.ub_RE	vb_RE	tau2_RE	se.tau2_RE	tau2.f_RE	k_RE	QE_RE	QEp_RE	QM_RE	QMp_RE	I2_RE	H2_RE
HorvathAgeAccel	microalbuminuria	all	0.0134456	0.0110369	1.21824	0.223132	-0.00818629	0.0350775	1.01354	0.991847	1.0357	0.000121813	4	1.41009	0.703172	1.48412	0.223132	0	0.470029	0.0134456	0.0110369	1.21824	0.223132	-0.00818629	0.0350775	0.000121813	0	0.000405819	0	4	1.41009	0.703172	1.48412	0.223132	0	1
HannumAgeAccel		all	0.0524326	0.010751	4.877	1.07712e-06	0.031361	0.0735042	1.05383	1.03186	1.07627	0.000115584	4	0.594684	0.897648	23.7851	1.07712e-06	0	0.198228	0.0524326	0.010751	4.877	1.07712e-06	0.031361	0.0735042	0.000115584	0	0.000418595	0	4	0.594684	0.897648	23.7851	1.07712e-06	0	1
GrimAgeAccel		all	0.10061	0.0146955	6.84629	7.57873e-12	0.0718072	0.129413	1.10585	1.07445	1.13816	0.000215959	4	1.91464	0.590311	46.8717	7.57873e-12	0	0.638213	0.10061	0.0146955	6.84629	7.57873e-12	0.0718072	0.129413	0.000215959	0	0.00071032	0	4	1.91464	0.590311	46.8717	7.57873e-12	0	1
PhenoAgeAccel		all	0.0345616	0.00882289	3.91726	8.95594e-05	0.017269	0.0518541	1.03517	1.01742	1.05322	7.78433e-05	4	1.81211	0.612304	15.345	8.95594e-05	0	0.604036	0.0345616	0.00882289	3.91726	8.95594e-05	0.017269	0.0518541	7.78433e-05	0	0.000270701	0	4	1.81211	0.612304	15.345	8.95594e-05	0	1
EEAA		all	0.0464966	0.00883603	5.26216	1.42376e-07	0.0291783	0.0638149	1.04759	1.02961	1.0659	7.80754e-05	4	0.756937	0.859737	27.6903	1.42376e-07	0	0.252312	0.0464966	0.00883603	5.26216	1.42376e-07	0.0291783	0.0638149	7.80754e-05	0	0.000273656	0	4	0.756937	0.859737	27.6903	1.42376e-07	0	1
MRS_continuous		all	0.805653	0.13022	6.18687	6.13706e-10	0.550427	1.06088	2.23816	1.73399	2.88892	0.0169572	4	9.29198	0.0256504	38.2774	6.13706e-10	67.7141	3.09733	0.786941	0.228766	3.43994	0.000581853	0.338568	1.23531	0.052334	0.140892	0.170925	0.140892	4	9.29198	0.0256504	11.8332	0.000581853	67.3965	3.06716
IEAA		all	0.0150379	0.0121131	1.24145	0.214438	-0.0087034	0.0387792	1.01515	0.991334	1.03954	0.000146728	4	1.13327	0.769048	1.54121	0.214438	0	0.377758	0.0150379	0.0121131	1.24145	0.214438	-0.0087034	0.0387792	0.000146728	0	0.000497611	0	4	1.13327	0.769048	1.54121	0.214438	0	1
MRS_Moderate		all	0.0173422	0.0920319	0.188436	0.850535	-0.163037	0.197721	1.01749	0.849557	1.21863	0.00846986	4	10.906	0.0122454	0.0355083	0.850535	72.4921	3.63532	0.0597621	0.187658	0.318462	0.750134	-0.308042	0.427566	0.0352157	0.100957	0.114946	0.100957	4	10.906	0.0122454	0.101418	0.750134	73.6745	3.79861
MRS_High		all	0.730033	0.138494	5.27122	1.35522e-07	0.45859	1.00148	2.07515	1.58183	2.72231	0.0191807	4	2.98549	0.393868	27.7857	1.35522e-07	0	0.995163	0.730033	0.138494	5.27122	1.35522e-07	0.45859	1.00148	0.0191807	0	0.0593552	0	4	2.98549	0.393868	27.7857	1.35522e-07	0	1
HorvathAgeAccel		EA	0.00876398	0.0118601	0.738948	0.459939	-0.0144813	0.0320093	1.0088	0.985623	1.03253	0.000140661	3	0.247264	0.883705	0.546044	0.459939	0	0.123632	0.00876398	0.0118601	0.738948	0.459939	-0.0144813	0.0320093	0.000140661	0	0.000442988	0	3	0.247264	0.883705	0.546044	0.459939	0	1
HannumAgeAccel		EA	0.0525245	0.0114619	4.58254	4.59369e-06	0.0300596	0.0749894	1.05393	1.03052	1.07787	0.000131375	3	0.594149	0.742989	20.9996	4.59369e-06	0	0.297074	0.0525245	0.0114619	4.58254	4.59369e-06	0.0300596	0.0749894	0.000131375	0	0.000472983	0	3	0.594149	0.742989	20.9996	4.59369e-06	0	1
GrimAgeAccel		EA	0.108689	0.0159969	6.79439	1.0877e-11	0.077336	0.140043	1.11482	1.0804	1.15032	0.000255901	3	0.280372	0.869196	46.1638	1.0877e-11	0	0.140186	0.108689	0.0159969	6.79439	1.0877e-11	0.077336	0.140043	0.000255901	0	0.00078603	0	3	0.280372	0.869196	46.1638	1.0877e-11	0	1
PhenoAgeAccel		EA	0.0388258	0.00960604	4.04181	5.30405e-05	0.0199983	0.0576533	1.03959	1.0202	1.05935	9.2276e-05	3	0.552232	0.758725	16.3362	5.30405e-05	0	0.276116	0.0388258	0.00960604	4.04181	5.30405e-05	0.0199983	0.0576533	9.2276e-05	0	0.000317101	0	3	0.552232	0.758725	16.3362	5.30405e-05	0	1
EEAA		EA	0.0468067	0.00946511	4.94519	7.607e-07	0.0282555	0.065358	1.04792	1.02866	1.06754	8.95882e-05	3	0.74858	0.687777	24.4549	7.607e-07	0	0.37429	0.0468067	0.00946511	4.94519	7.607e-07	0.0282555	0.065358	8.95882e-05	0	0.000306983	0	3	0.74858	0.687777	24.4549	7.607e-07	0	1
MRS_continuous		EA	1.01189	0.149144	6.78467	1.16354e-11	0.719576	1.30421	2.7508	2.05355	3.68479	0.0222439	3	1.24643	0.536218	46.0317	1.16354e-11	0	0.623214	1.01189	0.149144	6.78467	1.16354e-11	0.719576	1.30421	0.0222439	0	0.0670736	0	3	1.24643	0.536218	46.0317	1.16354e-11	0	1
IEAA		EA	0.0120791	0.0130905	0.922739	0.356143	-0.0135778	0.0377361	1.01215	0.986513	1.03846	0.000171362	3	0.777899	0.677769	0.851447	0.356143	0	0.388949	0.0120791	0.0130905	0.922739	0.356143	-0.0135778	0.0377361	0.000171362	0	0.000557236	0	3	0.777899	0.677769	0.851447	0.356143	0	1
MRS_Moderate		EA	0.0299845	0.0973926	0.307872	0.75818	-0.160902	0.220871	1.03044	0.851373	1.24717	0.00948533	3	10.7486	0.00463422	0.0947853	0.75818	81.3929	5.37429	0.102352	0.246525	0.415178	0.678012	-0.380828	0.585531	0.0607744	0.151756	0.182441	0.151756	3	10.7486	0.00463422	0.172372	0.678012	83.736	6.14856
MRS_High		EA	0.735401	0.140946	5.21763	1.81229e-07	0.459153	1.01165	2.08632	1.58273	2.75015	0.0198656	3	2.94342	0.229533	27.2236	1.81229e-07	32.0519	1.47171	0.735404	0.140948	5.21755	1.81306e-07	0.45915	1.01166	0.0198664	1.62168e-06	0.0598104	1.62168e-06	3	2.94342	0.229533	27.2228	1.81306e-07	0.00227021	1.00002
Legend here
pval threshold	0.00142857

## Sheet: ST4
Additional file 1: Table S4. Study-level and meta-analytic results using double-standardized regression coefficients
4.1. Linear regression models
Model 2: continuous kidney trait ~ DNAm predictor + chronological age + sex + BMI + log-transformed triglycerides + HDL + hypertension + smoking status + diabetes
trait	clock	Estimate.xy	SE.xy	CI lower	CI upper	P	study
log(eGFR)	EEAA	-0.0396511	0.0207106	-0.0802438	0.000941569	0.0557188	KORA
log(eGFR)	EEAA	-0.0350441	0.0311756	-0.0961483	0.0260601	0.261022	ESTHER_I
log(eGFR)	EEAA	-0.0148012	0.0361235	-0.0856031	0.0560008	0.682666	ESTHER_II
log(eGFR)	EEAA	-0.0456829	0.0366359	-0.117489	0.0261235	0.212902	WHI_AA
log(eGFR)	EEAA	-0.0469782	0.0546982	-0.154187	0.0602302	0.390989	WHI_HA
log(eGFR)	EEAA	-0.0281401	0.0323233	-0.0914937	0.0352136	0.384231	WHI_EA
log(eGFR)	EEAA	-0.193578	0.0457661	-0.283279	-0.103876	2e-05	NAS
log(eGFR)	EEAA	-0.0506612	0.0130475	-0.0762339	-0.0250886	0.000103249	Metaanalysis_all_FE
log(eGFR)	EEAA	-0.0580805	0.0212919	-0.0998118	-0.0163491	0.0063754	Metaanalysis_all_RE
log(eGFR)	EEAA	-0.0516915	0.0144415	-0.0799964	-0.0233867	0.000344418	Metaanalysis_EA_FE
log(eGFR)	EEAA	-0.0673402	0.0348434	-0.135632	0.000951703	0.0532793	Metaanalysis_EA_RE
log(eGFR)	EEAA	-0.0516915	0.0144415	-0.0799964	-0.0233867	0.000344418	Metaanalysis_AA_FE
log(eGFR)	EEAA	-0.0673402	0.0348434	-0.135632	0.000951703	0.0532793	Metaanalysis_AA_RE
log(eGFR)	GrimAgeAccel	-0.0954104	0.0276997	-0.149702	-0.0411191	0.000586055	KORA
log(eGFR)	GrimAgeAccel	0.00237669	0.0462606	-0.0882941	0.0930475	0.959154	ESTHER_I
log(eGFR)	GrimAgeAccel	0.0842841	0.0500912	-0.0138948	0.182463	0.0928602	ESTHER_II
log(eGFR)	GrimAgeAccel	0.0333218	0.0360005	-0.0372393	0.103883	0.354884	WHI_AA
log(eGFR)	GrimAgeAccel	-0.109637	0.0485265	-0.204749	-0.0145251	0.0242414	WHI_HA
log(eGFR)	GrimAgeAccel	-0.0616484	0.0322915	-0.12494	0.00164294	0.0564634	WHI_EA
log(eGFR)	GrimAgeAccel	-0.0214754	0.0136906	-0.048309	0.00535812	0.11598	NAS
log(eGFR)	GrimAgeAccel	-0.0428002	0.0302495	-0.102089	0.0164888	0.157096	JHS
log(eGFR)	GrimAgeAccel	-0.0352098	0.00982758	-0.0544715	-0.0159481	0.000339996	Metaanalysis_all_FE
log(eGFR)	GrimAgeAccel	-0.0409464	0.0171916	-0.0746414	-0.00725148	0.0172298	Metaanalysis_all_RE
log(eGFR)	GrimAgeAccel	-0.0368187	0.0111353	-0.0586435	-0.014994	0.000944724	Metaanalysis_EA_FE
log(eGFR)	GrimAgeAccel	-0.0456801	0.0206097	-0.0860743	-0.00528582	0.0266616	Metaanalysis_EA_RE
log(eGFR)	GrimAgeAccel	-0.0368187	0.0111353	-0.0586435	-0.014994	0.000944724	Metaanalysis_AA_FE
log(eGFR)	GrimAgeAccel	-0.0456801	0.0206097	-0.0860743	-0.00528582	0.0266616	Metaanalysis_AA_RE
log(eGFR)	HannumAgeAccel	-0.0357302	0.0207377	-0.076376	0.00491566	0.0850771	KORA
log(eGFR)	HannumAgeAccel	-0.0222386	0.0321548	-0.085262	0.0407848	0.489527	ESTHER_I
log(eGFR)	HannumAgeAccel	-0.00533686	0.0372375	-0.0783224	0.0676487	0.884309	ESTHER_II
log(eGFR)	HannumAgeAccel	-0.0570738	0.0285592	-0.11305	-0.00109772	0.0459433	WHI_AA
log(eGFR)	HannumAgeAccel	-0.0496894	0.0400718	-0.12823	0.0288512	0.215483	WHI_HA
log(eGFR)	HannumAgeAccel	-0.0464537	0.0257598	-0.096943	0.00403561	0.0715636	WHI_EA
log(eGFR)	HannumAgeAccel	-0.0259931	0.0242602	-0.0735431	0.0215569	0.28229	NAS
log(eGFR)	HannumAgeAccel	-0.0740501	0.0320552	-0.136878	-0.0112219	0.0208836	JHS
log(eGFR)	HannumAgeAccel	-0.0420305	0.0103581	-0.0623319	-0.021729	4.95476e-05	Metaanalysis_all_FE
log(eGFR)	HannumAgeAccel	-0.0420305	0.0103581	-0.0623319	-0.021729	4.95476e-05	Metaanalysis_all_RE
log(eGFR)	HannumAgeAccel	-0.0336632	0.0124049	-0.0579762	-0.00935012	0.00665342	Metaanalysis_EA_FE
log(eGFR)	HannumAgeAccel	-0.0336632	0.0124049	-0.0579762	-0.00935012	0.00665342	Metaanalysis_EA_RE
log(eGFR)	HannumAgeAccel	-0.0336632	0.0124049	-0.0579762	-0.00935012	0.00665342	Metaanalysis_AA_FE
log(eGFR)	HannumAgeAccel	-0.0336632	0.0124049	-0.0579762	-0.00935012	0.00665342	Metaanalysis_AA_RE
log(eGFR)	HorvathAgeAccel	-0.0504371	0.020954	-0.091507	-0.00936721	0.0161883	KORA
log(eGFR)	HorvathAgeAccel	0.00151181	0.0325984	-0.0623811	0.0654047	0.963188	ESTHER_I
log(eGFR)	HorvathAgeAccel	-0.0085698	0.0368502	-0.0807961	0.0636565	0.817876	ESTHER_II
log(eGFR)	HorvathAgeAccel	-0.0535502	0.0289725	-0.110336	0.00323596	0.0648566	WHI_AA
log(eGFR)	HorvathAgeAccel	0.0106149	0.0402226	-0.0682213	0.0894511	0.791949	WHI_HA
log(eGFR)	HorvathAgeAccel	-0.0185049	0.0271227	-0.0716653	0.0346555	0.49519	WHI_EA
log(eGFR)	HorvathAgeAccel	-0.0980222	0.0270004	-0.150943	-0.0451013	0.0003	NAS
log(eGFR)	HorvathAgeAccel	0.0182433	0.0258127	-0.0323496	0.0688362	0.479718	JHS
log(eGFR)	HorvathAgeAccel	-0.0327126	0.010392	-0.0530805	-0.0123448	0.00164458	Metaanalysis_all_FE
log(eGFR)	HorvathAgeAccel	-0.0300115	0.016037	-0.0614434	0.00142047	0.0612911	Metaanalysis_all_RE
log(eGFR)	HorvathAgeAccel	-0.0458955	0.0129645	-0.0713054	-0.0204856	0.000399979	Metaanalysis_EA_FE
log(eGFR)	HorvathAgeAccel	-0.0436073	0.0204234	-0.0836364	-0.00357821	0.0327475	Metaanalysis_EA_RE
log(eGFR)	HorvathAgeAccel	-0.0458955	0.0129645	-0.0713054	-0.0204856	0.000399979	Metaanalysis_AA_FE
log(eGFR)	HorvathAgeAccel	-0.0436073	0.0204234	-0.0836364	-0.00357821	0.0327475	Metaanalysis_AA_RE
log(eGFR)	MRS_continuous	-0.0421869	0.0256015	-0.0923658	0.00799201	0.0996034	KORA
log(eGFR)	MRS_continuous	-0.0323717	0.035074	-0.101117	0.0363734	0.356232	ESTHER_I
log(eGFR)	MRS_continuous	0.0234816	0.0397188	-0.0543673	0.10133	0.55464	ESTHER_II
log(eGFR)	MRS_continuous	-0.0423087	0.0320598	-0.105146	0.0205285	0.187248	WHI_AA
log(eGFR)	MRS_continuous	-0.122492	0.0428909	-0.206558	-0.0384254	0.00444862	WHI_HA
log(eGFR)	MRS_continuous	-0.0434242	0.0275901	-0.0975008	0.0106524	0.11575	WHI_EA
log(eGFR)	MRS_continuous	-0.0808969	0.0250464	-0.129988	-0.031806	0.00126761	NAS
log(eGFR)	MRS_continuous	-0.0932867	0.0259503	-0.144149	-0.0424241	0.000324615	JHS
log(eGFR)	MRS_continuous	-0.0634053	0.0110111	-0.0849866	-0.041824	8.49568e-09	Metaanalysis_all_FE
log(eGFR)	MRS_continuous	-0.0634053	0.0110118	-0.084988	-0.0418226	8.51428e-09	Metaanalysis_all_RE
log(eGFR)	MRS_continuous	-0.0527378	0.0138061	-0.0797972	-0.0256783	0.000133512	Metaanalysis_EA_FE
log(eGFR)	MRS_continuous	-0.0527378	0.0138061	-0.0797972	-0.0256783	0.000133512	Metaanalysis_EA_RE
log(eGFR)	MRS_continuous	-0.0527378	0.0138061	-0.0797972	-0.0256783	0.000133512	Metaanalysis_AA_FE
log(eGFR)	MRS_continuous	-0.0527378	0.0138061	-0.0797972	-0.0256783	0.000133512	Metaanalysis_AA_RE
log(eGFR)	PhenoAgeAccel	-0.0672209	0.0204222	-0.107248	-0.0271934	0.00101668	KORA
log(eGFR)	PhenoAgeAccel	0.0220388	0.0313806	-0.0394672	0.0835447	0.482849	ESTHER_I
log(eGFR)	PhenoAgeAccel	-0.00438941	0.0363067	-0.0755506	0.0667717	0.901946	ESTHER_II
log(eGFR)	PhenoAgeAccel	-0.0409749	0.0291746	-0.0981572	0.0162074	0.160494	WHI_AA
log(eGFR)	PhenoAgeAccel	-0.0489746	0.0406676	-0.128683	0.030734	0.228989	WHI_HA
log(eGFR)	PhenoAgeAccel	-0.0227	0.0271976	-0.0760073	0.0306072	0.404075	WHI_EA
log(eGFR)	PhenoAgeAccel	-0.0411128	0.0247978	-0.0897165	0.00749086	0.09765	NAS
log(eGFR)	PhenoAgeAccel	-0.0212383	0.0221989	-0.0647481	0.0222714	0.338703	JHS
log(eGFR)	PhenoAgeAccel	-0.0350186	0.00990145	-0.0544251	-0.0156121	0.00040514	Metaanalysis_all_FE
log(eGFR)	PhenoAgeAccel	-0.0342695	0.0108656	-0.0555657	-0.0129734	0.00161076	Metaanalysis_all_RE
log(eGFR)	PhenoAgeAccel	-0.0369786	0.0125085	-0.0614949	-0.0124624	0.00311379	Metaanalysis_EA_FE
log(eGFR)	PhenoAgeAccel	-0.0321521	0.0180791	-0.0675864	0.00328225	0.0753358	Metaanalysis_EA_RE
log(eGFR)	PhenoAgeAccel	-0.0369786	0.0125085	-0.0614949	-0.0124624	0.00311379	Metaanalysis_AA_FE
log(eGFR)	PhenoAgeAccel	-0.0321521	0.0180791	-0.0675864	0.00328225	0.0753358	Metaanalysis_AA_RE
log(uACR)	EEAA	0.0904747	0.0235169	0.0443816	0.136568	0.000123885	KORA
log(uACR)	EEAA	0.0630685	0.0332682	-0.00213727	0.128274	0.0583062	ESTHER_I
log(uACR)	EEAA	0.0722168	0.0381208	-0.00249992	0.146934	0.0586321	ESTHER_II
log(uACR)	EEAA	0.0794959	0.0171503	0.045882	0.11311	3.56492e-06	Metaanalysis_all_FE
log(uACR)	EEAA	0.0794959	0.0171503	0.045882	0.11311	3.56492e-06	Metaanalysis_all_RE
log(uACR)	EEAA	0.0794959	0.0171503	0.045882	0.11311	3.56492e-06	Metaanalysis_EA_FE
log(uACR)	EEAA	0.0794959	0.0171503	0.045882	0.11311	3.56492e-06	Metaanalysis_EA_RE
log(uACR)	GrimAgeAccel	0.16229	0.0313898	0.100766	0.223814	2.61604e-07	KORA
log(uACR)	GrimAgeAccel	0.155642	0.049464	0.0586928	0.252592	0.00170067	ESTHER_I
log(uACR)	GrimAgeAccel	0.203001	0.0519438	0.101191	0.304811	0.000101282	ESTHER_II
log(uACR)	GrimAgeAccel	0.0776908	0.054471	-0.0290724	0.184454	0.153788	JHS
log(uACR)	GrimAgeAccel	0.154717	0.0216611	0.112261	0.197172	9.15909e-13	Metaanalysis_all_FE
log(uACR)	GrimAgeAccel	0.154711	0.0216755	0.112228	0.197194	9.49792e-13	Metaanalysis_all_RE
log(uACR)	GrimAgeAccel	0.169185	0.0236081	0.122914	0.215456	7.69887e-13	Metaanalysis_EA_FE
log(uACR)	GrimAgeAccel	0.169185	0.0236081	0.122914	0.215456	7.69887e-13	Metaanalysis_EA_RE
log(uACR)	HannumAgeAccel	0.0920288	0.0235299	0.0459102	0.138147	9.54824e-05	KORA
log(uACR)	HannumAgeAccel	0.0512988	0.0342907	-0.015911	0.118508	0.134871	ESTHER_I
log(uACR)	HannumAgeAccel	0.0667676	0.0394586	-0.0105712	0.144107	0.0910158	ESTHER_II
log(uACR)	HannumAgeAccel	0.0707761	0.0454669	-0.0183391	0.159891	0.119554	JHS
log(uACR)	HannumAgeAccel	0.0758644	0.0162594	0.0439966	0.107732	3.07284e-06	Metaanalysis_all_FE
log(uACR)	HannumAgeAccel	0.0758644	0.0162594	0.0439966	0.107732	3.07284e-06	Metaanalysis_all_RE
log(uACR)	HannumAgeAccel	0.0766105	0.0174107	0.0424862	0.110735	1.08153e-05	Metaanalysis_EA_FE
log(uACR)	HannumAgeAccel	0.0766105	0.0174107	0.0424862	0.110735	1.08153e-05	Metaanalysis_EA_RE
log(uACR)	HorvathAgeAccel	0.00942077	0.0239478	-0.0375169	0.0563584	0.694082	KORA
log(uACR)	HorvathAgeAccel	-0.0203469	0.0350103	-0.088967	0.0482732	0.561185	ESTHER_I
log(uACR)	HorvathAgeAccel	0.00152859	0.0391283	-0.0751628	0.07822	0.968884	ESTHER_II
log(uACR)	HorvathAgeAccel	0.0535542	0.0438035	-0.0323007	0.139409	0.221481	JHS
log(uACR)	HorvathAgeAccel	0.00769613	0.0163652	-0.024379	0.0397713	0.638159	Metaanalysis_all_FE
log(uACR)	HorvathAgeAccel	0.00769613	0.0163652	-0.024379	0.0397713	0.638159	Metaanalysis_all_RE
log(uACR)	HorvathAgeAccel	0.000256899	0.0176427	-0.0343222	0.034836	0.988382	Metaanalysis_EA_FE
log(uACR)	HorvathAgeAccel	0.000256899	0.0176427	-0.0343222	0.034836	0.988382	Metaanalysis_EA_RE
log(uACR)	MRS_continuous	0.158354	0.0282896	0.102907	0.213802	2.59586e-08	KORA
log(uACR)	MRS_continuous	0.109083	0.037338	0.0359006	0.182266	0.00357008	ESTHER_I
log(uACR)	MRS_continuous	0.177277	0.0410109	0.0968955	0.257658	1.74918e-05	ESTHER_II
log(uACR)	MRS_continuous	0.023824	0.0416557	-0.0578213	0.105469	0.567373	JHS
log(uACR)	MRS_continuous	0.125967	0.0178523	0.0909771	0.160957	1.71297e-12	Metaanalysis_all_FE
log(uACR)	MRS_continuous	0.119544	0.0326763	0.0555001	0.183589	0.000253747	Metaanalysis_all_RE
log(uACR)	MRS_continuous	0.148949	0.0197589	0.110222	0.187675	4.76055e-14	Metaanalysis_EA_FE
log(uACR)	MRS_continuous	0.148949	0.0197589	0.110222	0.187675	4.76055e-14	Metaanalysis_EA_RE
log(uACR)	PhenoAgeAccel	0.0741335	0.02329	0.0284851	0.119782	0.00148367	KORA
log(uACR)	PhenoAgeAccel	0.0719664	0.0335383	0.0062313	0.137701	0.0321667	ESTHER_I
log(uACR)	PhenoAgeAccel	0.0701457	0.0384731	-0.00526173	0.145553	0.0687127	ESTHER_II
log(uACR)	PhenoAgeAccel	0.0312958	0.0400371	-0.0471769	0.109768	0.434408	JHS
log(uACR)	PhenoAgeAccel	0.0663596	0.0157484	0.0354932	0.0972259	2.51193e-05	Metaanalysis_all_FE
log(uACR)	PhenoAgeAccel	0.0663596	0.0157484	0.0354932	0.0972259	2.51193e-05	Metaanalysis_all_RE
log(uACR)	PhenoAgeAccel	0.0727777	0.0171292	0.0392051	0.10635	2.14969e-05	Metaanalysis_EA_FE
log(uACR)	PhenoAgeAccel	0.0727777	0.0171292	0.0392051	0.10635	2.14969e-05	Metaanalysis_EA_RE
urate	EEAA	0.0904747	0.0235169	0.0443816	0.136568	0.000123885	KORA
urate	EEAA	0.0630685	0.0332682	-0.00213727	0.128274	0.0583062	ESTHER_I
urate	EEAA	0.0722168	0.0381208	-0.00249992	0.146934	0.0586321	ESTHER_II
urate	EEAA	0.0551072	0.0136699	0.0283147	0.0818997	5.54725e-05	Metaanalysis_all_FE
urate	EEAA	0.0650891	0.0275794	0.0110346	0.119144	0.0182717	Metaanalysis_all_RE
urate	EEAA	0.0551072	0.0136699	0.0283147	0.0818997	5.54725e-05	Metaanalysis_EA_FE
urate	EEAA	0.0650891	0.0275794	0.0110346	0.119144	0.0182717	Metaanalysis_EA_RE
urate	GrimAgeAccel	0.16229	0.0313898	0.100766	0.223814	2.61604e-07	KORA
urate	GrimAgeAccel	0.155642	0.049464	0.0586928	0.252592	0.00170067	ESTHER_I
urate	GrimAgeAccel	0.203001	0.0519438	0.101191	0.304811	0.000101282	ESTHER_II
urate	GrimAgeAccel	0.0776908	0.054471	-0.0290724	0.184454	0.153788	JHS
urate	GrimAgeAccel	0.0385462	0.0105893	0.0177916	0.0593009	0.000272525	Metaanalysis_all_FE
urate	GrimAgeAccel	0.0512497	0.0211083	0.00987807	0.0926212	0.0151851	Metaanalysis_all_RE
urate	GrimAgeAccel	0.0341775	0.0113039	0.0120223	0.0563327	0.00249856	Metaanalysis_EA_FE
urate	GrimAgeAccel	0.0471013	0.0267307	-0.00528994	0.0994926	0.078058	Metaanalysis_EA_RE
urate	HannumAgeAccel	0.0920288	0.0235299	0.0459102	0.138147	9.54824e-05	KORA
urate	HannumAgeAccel	0.0512988	0.0342907	-0.015911	0.118508	0.134871	ESTHER_I
urate	HannumAgeAccel	0.0667676	0.0394586	-0.0105712	0.144107	0.0910158	ESTHER_II
urate	HannumAgeAccel	0.0707761	0.0454669	-0.0183391	0.159891	0.119554	JHS
urate	HannumAgeAccel	0.027884	0.0111178	0.0060936	0.0496744	0.0121396	Metaanalysis_all_FE
urate	HannumAgeAccel	0.027884	0.0111178	0.0060936	0.0496744	0.0121396	Metaanalysis_all_RE
urate	HannumAgeAccel	0.0323644	0.0124549	0.00795319	0.0567755	0.00936259	Metaanalysis_EA_FE
urate	HannumAgeAccel	0.0323644	0.0124549	0.00795319	0.0567755	0.00936259	Metaanalysis_EA_RE
urate	HorvathAgeAccel	0.00942077	0.0239478	-0.0375169	0.0563584	0.694082	KORA
urate	HorvathAgeAccel	-0.0203469	0.0350103	-0.088967	0.0482732	0.561185	ESTHER_I
urate	HorvathAgeAccel	0.00152859	0.0391283	-0.0751628	0.07822	0.968884	ESTHER_II
urate	HorvathAgeAccel	0.0535542	0.0438035	-0.0323007	0.139409	0.221481	JHS
urate	HorvathAgeAccel	0.0158701	0.0113988	-0.00647114	0.0382113	0.163844	Metaanalysis_all_FE
urate	HorvathAgeAccel	0.0172069	0.0130416	-0.00835412	0.0427679	0.18704	Metaanalysis_all_RE
urate	HorvathAgeAccel	0.0215684	0.0129143	-0.00374325	0.04688	0.0948973	Metaanalysis_EA_FE
urate	HorvathAgeAccel	0.0248151	0.0165135	-0.00755079	0.057181	0.132912	Metaanalysis_EA_RE
urate	MRS_continuous	0.158354	0.0282896	0.102907	0.213802	2.59586e-08	KORA
urate	MRS_continuous	0.109083	0.037338	0.0359006	0.182266	0.00357008	ESTHER_I
urate	MRS_continuous	0.177277	0.0410109	0.0968955	0.257658	1.74918e-05	ESTHER_II
urate	MRS_continuous	0.023824	0.0416557	-0.0578213	0.105469	0.567373	JHS
urate	MRS_continuous	0.0578096	0.0120522	0.0341878	0.0814315	1.61368e-06	Metaanalysis_all_FE
urate	MRS_continuous	0.0578036	0.0120925	0.0341028	0.0815044	1.75176e-06	Metaanalysis_all_RE
urate	MRS_continuous	0.0595089	0.0139558	0.0321561	0.0868618	2.00706e-05	Metaanalysis_EA_FE
urate	MRS_continuous	0.0593452	0.0159433	0.0280969	0.0905934	0.00019744	Metaanalysis_EA_RE
urate	PhenoAgeAccel	0.0741335	0.02329	0.0284851	0.119782	0.00148367	KORA
urate	PhenoAgeAccel	0.0719664	0.0335383	0.0062313	0.137701	0.0321667	ESTHER_I
urate	PhenoAgeAccel	0.0701457	0.0384731	-0.00526173	0.145553	0.0687127	ESTHER_II
urate	PhenoAgeAccel	0.0312958	0.0400371	-0.0471769	0.109768	0.434408	JHS
urate	PhenoAgeAccel	0.057473	0.010716	0.0364701	0.0784758	8.1712e-08	Metaanalysis_all_FE
urate	PhenoAgeAccel	0.0564242	0.0126049	0.0317192	0.0811293	7.59164e-06	Metaanalysis_all_RE
urate	PhenoAgeAccel	0.0567239	0.0123386	0.0325407	0.080907	4.28037e-06	Metaanalysis_EA_FE
urate	PhenoAgeAccel	0.0546449	0.0175245	0.0202975	0.0889922	0.00181958	Metaanalysis_EA_RE

## Sheet: ST5
Additional file 1: Table S5. Meta-analysis of associations between kidney and DNAm GrimAgeAccelAge traits
5.1. Linear regression models
Meta-analysis of model 2: continuous kidney trait ~ DNAm predictor + chronological age + sex + BMI + log-transformed triglycerides + HDL + hypertension + smoking status + diabetes
			Fixed effects meta-analysis (IVW)														Random effects meta-analysis (REML)
clock	trait	group	beta_FE	se_FE	zval_FE	pval_FE	ci.lb_FE	ci.ub_FE	vb_FE	k_FE	QE_FE	QEp_FE	QM_FE	QMp_FE	I2_FE	H2_FE	beta_RE	se_RE	zval_RE	pval_RE	ci.lb_RE	ci.ub_RE	vb_RE	tau2_RE	se.tau2_RE	k_RE	QE_RE	QEp_RE	QM_RE	QMp_RE	I2_RE	H2_RE
DNAmADM	UACR	all	0.00392796	0.00102368	3.8371	0.000124496	0.00192159	0.00593434	1.04792e-06	4	2.77745	0.427225	14.7233	0.000124496	0	0.925818	0.00389926	0.00108835	3.58272	0.000340039	0.00176613	0.0060324	1.18451e-06	3.63987e-07	4.22629e-06	4	2.77745	0.427225	12.8359	0.000340039	6.60321	1.0707
DNAmB2M		all	5.21782e-07	1.58476e-07	3.2925	0.000993023	2.11174e-07	8.32389e-07	2.51147e-14	4	2.47166	0.480435	10.8405	0.000993023	0	0.823886	5.21782e-07	1.58476e-07	3.2925	0.000993023	2.11174e-07	8.32389e-07	2.51147e-14	0	8.08232e-14	4	2.47166	0.480435	10.8405	0.000993023	0	1
DNAmCystatinC		all	1.28003	0.429719	2.97876	0.00289419	0.437795	2.12226	0.184659	4	6.3533	0.0956311	8.873	0.00289419	52.7804	2.11777	1.26079	0.650254	1.93892	0.0525108	-0.0136823	2.53527	0.42283	0.898873	1.38227	4	6.3533	0.0956311	3.75942	0.0525108	53.6312	2.15662
DNAmGDF15		all	0.000350183	0.000142383	2.45944	0.0139154	7.1117e-05	0.000629248	2.02729e-08	4	1.85495	0.60305	6.04885	0.0139154	0	0.618318	0.000350183	0.000142383	2.45944	0.0139154	7.1117e-05	0.000629248	2.02729e-08	0	6.73886e-08	4	1.85495	0.60305	6.04885	0.0139154	0	1
DNAmLeptin		all	1.85002e-06	6.83301e-06	0.270747	0.786586	-1.15424e-05	1.52425e-05	4.66901e-11	4	1.40427	0.704534	0.0733039	0.786586	0	0.468091	1.85002e-06	6.83301e-06	0.270747	0.786586	-1.15424e-05	1.52425e-05	4.66901e-11	0	1.5864e-10	4	1.40427	0.704534	0.0733039	0.786586	0	1
DNAmPACKYRS		all	0.00737032	0.00117188	6.28933	3.18831e-10	0.00507348	0.00966715	1.37329e-06	4	2.41523	0.490805	39.5557	3.18831e-10	0	0.805077	0.00737032	0.00117188	6.28933	3.18831e-10	0.00507348	0.00966715	1.37329e-06	0	4.52543e-06	4	2.41523	0.490805	39.5557	3.18831e-10	0	1
DNAmPAI1		all	2.26898e-05	6.17609e-06	3.67381	0.000238958	1.05849e-05	3.47947e-05	3.81441e-11	4	2.71414	0.43783	13.4969	0.000238958	0	0.904712	2.31422e-05	6.57193e-06	3.52136	0.000429332	1.02614e-05	3.60229e-05	4.31903e-11	1.42694e-11	1.50224e-10	4	2.71414	0.43783	12.4	0.000429332	7.32535	1.07904
DNAmTIMP1		all	3.86287	0.902711	4.27919	1.87572e-05	2.09359	5.63215	0.814887	4	25.0424	1.51286e-05	18.3115	1.87572e-05	88.0203	8.34746	5.0362	2.42898	2.07338	0.0381372	0.275479	9.79692	5.89996	19.5696	19.2691	4	25.0424	1.51286e-05	4.29889	0.0381372	84.5875	6.48823
DNAmADM		EA	0.00446338	0.00110536	4.03795	5.39193e-05	0.00229692	0.00662983	1.22181e-06	3	1.1289	0.568674	16.3051	5.39193e-05	0	0.564449	0.00446338	0.00110536	4.03795	5.39193e-05	0.00229692	0.00662983	1.22181e-06	0	4.63551e-06	3	1.1289	0.568674	16.3051	5.39193e-05	0	1
DNAmB2M		EA	6.62712e-07	2.03661e-07	3.25399	0.00113796	2.63543e-07	1.06188e-06	4.14779e-14	3	1.25788	0.533156	10.5885	0.00113796	0	0.628942	6.62712e-07	2.03661e-07	3.25399	0.00113796	2.63543e-07	1.06188e-06	4.14779e-14	0	1.47244e-13	3	1.25788	0.533156	10.5885	0.00113796	0	1
DNAmCystatinC		EA	1.75297	0.488132	3.59119	0.000329173	0.796253	2.7097	0.238273	3	2.18134	0.335991	12.8966	0.000329173	8.31335	1.09067	1.75298	0.488133	3.59118	0.00032918	0.796252	2.7097	0.238274	1.76835e-06	0.764839	3	2.18134	0.335991	12.8966	0.00032918	0.000224932	1
DNAmGDF15		EA	0.000461065	0.000166261	2.77314	0.00555174	0.0001352	0.00078693	2.76426e-08	3	0.186649	0.910898	7.69033	0.00555174	0	0.0933246	0.000461065	0.000166261	2.77314	0.00555174	0.0001352	0.00078693	2.76426e-08	0	9.61113e-08	3	0.186649	0.910898	7.69033	0.00555174	0	1
DNAmLeptin		EA	4.95764e-06	7.44389e-06	0.666001	0.50541	-9.63211e-06	1.95474e-05	5.54114e-11	3	0.296955	0.862019	0.443557	0.50541	0	0.148478	4.95764e-06	7.44389e-06	0.666001	0.50541	-9.63211e-06	1.95474e-05	5.54114e-11	0	1.81791e-10	3	0.296955	0.862019	0.443557	0.50541	0	1
DNAmPACKYRS		EA	0.00788206	0.00128626	6.12787	8.90645e-10	0.00536102	0.0104031	1.65448e-06	3	1.48389	0.476186	37.5508	8.90645e-10	0	0.741947	0.00788206	0.00128626	6.12787	8.90645e-10	0.00536102	0.0104031	1.65448e-06	0	5.10253e-06	3	1.48389	0.476186	37.5508	8.90645e-10	0	1
DNAmPAI1		EA	2.24444e-05	6.5836e-06	3.40913	0.000651695	9.54075e-06	3.5348e-05	4.33437e-11	3	2.70255	0.25891	11.6222	0.000651695	25.9959	1.35128	2.3963e-05	8.19879e-06	2.92275	0.00346958	7.89366e-06	4.00323e-05	6.72201e-11	5.74602e-11	2.14775e-10	3	2.70255	0.25891	8.54245	0.00346958	26.5685	1.36181
DNAmTIMP1		EA	7.63832	1.21088	6.30805	2.82579e-10	5.26503	10.0116	1.46624	3	3.1588	0.206098	39.7915	2.82579e-10	36.6849	1.5794	7.44265	1.58308	4.70138	2.58408e-06	4.33988	10.5454	2.50614	2.88789	7.62527	3	3.1588	0.206098	22.103	2.58408e-06	37.9485	1.61156
			Fixed effects meta-analysis (IVW)																	Random effects meta-analysis (REML)
clock	trait	group	beta_FE	se_FE	zval_FE	pval_FE	ci.lb_FE	ci.ub_FE	OR_FE	OR_lb_FE	OR_ub_FE	vb_FE	k_FE	QE_FE	QEp_FE	QM_FE	QMp_FE	I2_FE	H2_FE	beta_RE	se_RE	zval_RE	pval_RE	ci.lb_RE	ci.ub_RE	vb_RE	tau2_RE	se.tau2_RE	tau2.f_RE	k_RE	QE_RE	QEp_RE	QM_RE	QMp_RE	I2_RE	H2_RE
DNAmADM	microalbuminuria	all	0.0140784	0.00372564	3.77878	0.000157599	0.00677626	0.0213805	1.01418	1.0068	1.02161	1.38804e-05	4	4.80781	0.186423	14.2792	0.000157599	37.6016	1.6026	0.0135535	0.00483215	2.80486	0.00503386	0.00408266	0.0230243	2.33496e-05	3.261e-05	7.69647e-05	3.261e-05	4	4.80781	0.186423	7.86723	0.00503386	34.6831	1.531
DNAmB2M		all	1.53063e-06	5.29046e-07	2.89319	0.00381349	4.9372e-07	2.56754e-06	1	1	1	2.79889e-13	4	6.91341	0.0747094	8.37056	0.00381349	56.6061	2.30447	1.95775e-06	9.05387e-07	2.16234	0.0305921	1.83227e-07	3.73228e-06	8.19725e-13	1.87473e-12	2.67851e-12	1.87473e-12	4	6.91341	0.0747094	4.67571	0.0305921	59.366	2.46099
DNAmCystatinC		all	1.47146e-06	6.59894e-06	0.222984	0.823548	-1.14622e-05	1.44051e-05	1	0.999989	1.00001	4.3546e-11	4	15.539	0.00140946	0.0497218	0.823548	80.6937	5.17965	4.19211	2.23778	1.87333	0.0610227	-0.193866	8.57809	5.00768	13.9556	16.4309	13.9556	4	15.539	0.00140946	3.50937	0.0610227	75.3534	4.05735
DNAmGDF15		all	0.000821175	0.000483624	1.69796	0.0895147	-0.00012671	0.00176906	1.00082	0.999873	1.00177	2.33892e-07	4	4.57064	0.206075	2.88308	0.0895147	34.3636	1.52355	0.000862661	0.00060925	1.41594	0.156793	-0.000331447	0.00205677	3.71185e-07	5.11605e-07	1.21264e-06	5.11605e-07	4	4.57064	0.206075	2.00488	0.156793	34.4826	1.52631
DNAmLeptin		all	2.88549e-05	2.50394e-05	1.15238	0.249166	-2.02215e-05	7.79313e-05	1.00003	0.99998	1.00008	6.26974e-10	4	1.51643	0.678484	1.32797	0.249166	0	0.505475	2.88549e-05	2.50394e-05	1.15238	0.249166	-2.02215e-05	7.79313e-05	6.26974e-10	0	2.04257e-09	0	4	1.51643	0.678484	1.32797	0.249166	0	1
DNAmPACKYRS		all	0.0232759	0.0040902	5.69065	1.26559e-08	0.0152592	0.0312925	1.02355	1.01538	1.03179	1.67297e-05	4	0.686772	0.876311	32.3835	1.26559e-08	0	0.228924	0.0232759	0.0040902	5.69065	1.26559e-08	0.0152592	0.0312925	1.67297e-05	0	5.46569e-05	0	4	0.686772	0.876311	32.3835	1.26559e-08	0	1
DNAmPAI1		all	9.51314e-05	2.20989e-05	4.30481	1.67131e-05	5.18184e-05	0.000138444	1.0001	1.00005	1.00014	4.8836e-10	4	2.96131	0.397628	18.5314	1.67131e-05	0	0.987105	9.51604e-05	2.21537e-05	4.29546	1.74328e-05	5.174e-05	0.000138581	4.90786e-10	7.54411e-12	1.65553e-09	7.54411e-12	4	2.96131	0.397628	18.451	1.74328e-05	0.34797	1.00349
DNAmTIMP1		all	-5.68462e-05	0.00014649	-0.388057	0.697974	-0.000343961	0.000230268	0.999943	0.999656	1.00023	2.14592e-08	4	31.4835	6.72377e-07	0.150588	0.697974	90.4712	10.4945	15.757	6.69291	2.35429	0.0185583	2.63917	28.8749	44.795	142.954	146.444	142.954	4	31.4835	6.72377e-07	5.54267	0.0185583	84.8061	6.58161
DNAmADM		EA	0.0176112	0.004095	4.30067	1.70279e-05	0.0095852	0.0256373	1.01777	1.00963	1.02597	1.6769e-05	3	0.486956	0.783897	18.4958	1.70279e-05	0	0.243478	0.0176112	0.004095	4.30067	1.70279e-05	0.0095852	0.0256373	1.6769e-05	0	5.64297e-05	0	3	0.486956	0.783897	18.4958	1.70279e-05	0	1
DNAmB2M		EA	2.44888e-06	7.41494e-07	3.30263	0.000957813	9.95581e-07	3.90218e-06	1	1	1	5.49813e-13	3	3.78962	0.150347	10.9074	0.000957813	47.2242	1.89481	2.6444e-06	1.08364e-06	2.4403	0.0146749	5.20514e-07	4.76829e-06	1.17427e-12	1.70533e-12	3.57434e-12	1.70533e-12	3	3.78962	0.150347	5.95509	0.0146749	48.0445	1.92472
DNAmCystatinC		EA	6.55193	1.74442	3.75593	0.000172698	3.13292	9.97093	700.593	22.9395	21396.7	3.04301	3	1.43195	0.488715	14.107	0.000172698	0	0.715976	6.55193	1.74442	3.75593	0.000172698	3.13292	9.97093	3.04301	0	9.30606	0	3	1.43195	0.488715	14.107	0.000172698	0	1
DNAmGDF15		EA	0.00138137	0.000573571	2.40837	0.0160237	0.000257195	0.00250555	1.00138	1.00026	1.00251	3.28983e-07	3	1.27043	0.529822	5.80027	0.0160237	0	0.635215	0.00138137	0.000573571	2.40837	0.0160237	0.000257195	0.00250555	3.28983e-07	0	1.04471e-06	0	3	1.27043	0.529822	5.80027	0.0160237	0	1
DNAmLeptin		EA	3.73297e-05	2.63269e-05	1.41793	0.156211	-1.42701e-05	8.89295e-05	1.00004	0.999986	1.00009	6.93106e-10	3	0.430375	0.80639	2.01053	0.156211	0	0.215188	3.73297e-05	2.63269e-05	1.41793	0.156211	-1.42701e-05	8.89295e-05	6.93106e-10	0	2.13054e-09	0	3	0.430375	0.80639	2.01053	0.156211	0	1
DNAmPACKYRS		EA	0.024374	0.00444715	5.48081	4.23379e-08	0.0156577	0.0330902	1.02467	1.01578	1.03364	1.97771e-05	3	0.291074	0.864558	30.0393	4.23379e-08	0	0.145537	0.024374	0.00444715	5.48081	4.23379e-08	0.0156577	0.0330902	1.97771e-05	0	5.9982e-05	0	3	0.291074	0.864558	30.0393	4.23379e-08	0	1
DNAmPAI1		EA	9.23985e-05	2.35319e-05	3.92652	8.61822e-05	4.62769e-05	0.00013852	1.00009	1.00005	1.00014	5.53749e-10	3	2.84709	0.240858	15.4176	8.61822e-05	29.7529	1.42355	9.37305e-05	2.84966e-05	3.28918	0.0010048	3.78781e-05	0.000149583	8.12057e-10	6.8633e-10	2.50954e-09	6.8633e-10	3	2.84709	0.240858	10.8187	0.0010048	27.2388	1.37436
DNAmTIMP1		EA	23.0888	4.13212	5.58763	2.3019e-08	14.99	31.1876	1.06493e+10	3.23585e+06	3.50471e+13	17.0744	3	0.261763	0.877322	31.2216	2.3019e-08	0	0.130882	23.0888	4.13212	5.58763	2.3019e-08	14.99	31.1876	17.0744	0	51.8871	0	3	0.261763	0.877322	31.2216	2.3019e-08	0	1
			Fixed effects meta-analysis (IVW)														Random effects meta-analysis (REML)
clock	trait	group	beta_FE	se_FE	zval_FE	pval_FE	ci.lb_FE	ci.ub_FE	vb_FE	k_FE	QE_FE	QEp_FE	QM_FE	QMp_FE	I2_FE	H2_FE	beta_RE	se_RE	zval_RE	pval_RE	ci.lb_RE	ci.ub_RE	vb_RE	tau2_RE	se.tau2_RE	tau2.f_RE	k_RE	QE_RE	QEp_RE	QM_RE	QMp_RE	I2_RE	H2_RE
DNAmADM	urate	all	0.00291527	0.000698328	4.17464	2.98452e-05	0.00154657	0.00428397	4.87661e-07	5	11.3621	0.0227818	17.4277	2.98452e-05	64.7954	2.84054	0.00371913	0.00177092	2.10011	0.0357193	0.000248185	0.00719007	3.13616e-06	1.09062e-05	1.07155e-05	1.09062e-05	5	11.3621	0.0227818	4.41046	0.0357193	79.4554	4.86747
DNAmB2M		all	-1.64139e-08	1.06759e-07	-0.153747	0.877809	-2.25658e-07	1.9283e-07	1.13975e-14	4	6.0821	0.107684	0.023638	0.877809	50.6749	2.02737	7.11588e-08	1.73702e-07	0.409662	0.682054	-2.6929e-07	4.11608e-07	3.01722e-14	4.82812e-14	9.38235e-14	4.82812e-14	4	6.0821	0.107684	0.167823	0.682054	43.4768	1.76918
DNAmCystatinC		all	0.80196	0.0950189	8.44	3.17331e-17	0.615726	0.988193	0.00902859	5	10.3243	0.0353055	71.2336	3.17331e-17	61.2564	2.58107	0.391301	0.376117	1.04037	0.298168	-0.345875	1.12848	0.141464	0.357793	0.474942	0.357793	5	10.3243	0.0353055	1.08237	0.298168	60.381	2.52404
DNAmGDF15		all	0.000284214	0.000100038	2.84107	0.00449626	8.81436e-05	0.000480284	1.00075e-08	5	10.0273	0.0399702	8.07167	0.00449626	60.1089	2.50683	0.000348246	0.000170872	2.03805	0.0415445	1.33434e-05	0.000683149	2.91972e-08	7.03113e-08	9.75917e-08	7.03113e-08	5	10.0273	0.0399702	4.15366	0.0415445	54.5877	2.20204
DNAmLeptin		all	5.29261e-06	5.36527e-06	0.986458	0.323908	-5.22312e-06	1.58083e-05	2.87861e-11	5	4.93333	0.294207	0.9731	0.323908	18.9189	1.23333	6.90875e-06	6.55363e-06	1.05419	0.291797	-5.93613e-06	1.97536e-05	4.29501e-11	4.77316e-11	1.45351e-10	4.77316e-11	5	4.93333	0.294207	1.11131	0.291797	21.8117	1.27896
DNAmPACKYRS		all	0.0037531	0.000852002	4.40504	1.05762e-05	0.00208321	0.005423	7.25907e-07	5	6.1172	0.190565	19.4044	1.05762e-05	34.6107	1.5293	0.0038333	0.00111816	3.42821	0.000607578	0.00164174	0.00602486	1.25029e-06	2.04996e-06	4.16509e-06	2.04996e-06	5	6.1172	0.190565	11.7526	0.000607578	34.116	1.51782
DNAmPAI1		all	2.89436e-05	4.31055e-06	6.7146	1.88586e-11	2.04951e-05	3.73921e-05	1.85808e-11	5	10.3182	0.035395	45.0858	1.88586e-11	61.2337	2.57956	3.24109e-05	8.69799e-06	3.72625	0.000194349	1.53631e-05	4.94586e-05	7.5655e-11	2.31298e-10	2.57627e-10	2.31298e-10	5	10.3182	0.035395	13.8849	0.000194349	68.4702	3.1716
DNAmTIMP1		all	0.4046	0.554012	0.730309	0.465201	-0.681244	1.49044	0.30693	5	9.15858	0.0572557	0.533351	0.465201	56.3251	2.28964	0.778411	0.946842	0.822113	0.411013	-1.07737	2.63419	0.896509	2.09184	2.98394	2.09184	5	9.15858	0.0572557	0.675869	0.411013	52.0326	2.08475
DNAmADM		EA	0.00245994	0.000810309	3.03581	0.0023989	0.000871768	0.00404812	6.56601e-07	4	10.1349	0.0174532	9.21615	0.0023989	70.3995	3.37832	0.00424048	0.00283992	1.49317	0.135394	-0.00132567	0.00980663	8.06517e-06	2.47752e-05	2.60201e-05	2.47752e-05	4	10.1349	0.0174532	2.22954	0.135394	87.5897	8.05781
DNAmB2M		EA	2.76728e-07	1.68852e-07	1.63887	0.10124	-5.42172e-08	6.07672e-07	2.85112e-14	3	1.06084	0.588357	2.6859	0.10124	0	0.530421	2.76728e-07	1.68852e-07	1.63887	0.10124	-5.42172e-08	6.07672e-07	2.85112e-14	0	1.05845e-13	0	3	1.06084	0.588357	2.6859	0.10124	0	1
DNAmCystatinC		EA	0.849401	0.0964948	8.80255	1.3374e-18	0.660274	1.03853	0.00931126	4	2.362	0.500747	77.4849	1.3374e-18	0	0.787334	0.849401	0.0964958	8.80247	1.33843e-18	0.660272	1.03853	0.00931143	1.96266e-07	0.162407	1.96266e-07	4	2.362	0.500747	77.4834	1.33843e-18	7.09629e-05	1
DNAmGDF15		EA	0.000437061	0.000127398	3.43067	0.000602101	0.000187365	0.000686756	1.62303e-08	4	6.273	0.0990577	11.7695	0.000602101	52.176	2.091	0.000473416	0.000188147	2.5162	0.0118629	0.000104654	0.000842178	3.53994e-08	5.09584e-08	1.12471e-07	5.09584e-08	4	6.273	0.0990577	6.33125	0.0118629	36.8021	1.58233
DNAmLeptin		EA	5.55895e-06	6.0197e-06	0.92346	0.355767	-6.23944e-06	1.73573e-05	3.62368e-11	4	4.92381	0.177462	0.852779	0.355767	39.0716	1.64127	1.03973e-05	9.64408e-06	1.0781	0.28099	-8.50478e-06	2.92993e-05	9.30084e-11	1.56124e-10	2.98159e-10	1.56124e-10	4	4.92381	0.177462	1.1623	0.28099	44.0735	1.78806
DNAmPACKYRS		EA	0.00305833	0.000995721	3.07148	0.00213003	0.00110676	0.00500991	9.9146e-07	4	4.29945	0.230891	9.43396	0.00213003	30.2237	1.43315	0.0031555	0.00121521	2.59668	0.0094129	0.000773743	0.00553726	1.47672e-06	1.39319e-06	4.60983e-06	1.39319e-06	4	4.29945	0.230891	6.74276	0.0094129	22.9691	1.29818
DNAmPAI1		EA	2.39321e-05	4.89883e-06	4.88528	1.03284e-06	1.43306e-05	3.35337e-05	2.39985e-11	4	5.68254	0.128119	23.8659	1.03284e-06	47.2067	1.89418	2.72929e-05	8.30944e-06	3.28456	0.00102142	1.10067e-05	4.35791e-05	6.90468e-11	1.30976e-10	2.18023e-10	1.30976e-10	4	5.68254	0.128119	10.7883	0.00102142	51.3806	2.05679
DNAmTIMP1		EA	1.36152	0.817188	1.66611	0.0956925	-0.240138	2.96318	0.667797	4	6.62108	0.0850077	2.77591	0.0956925	54.6902	2.20703	1.41005	1.27094	1.10945	0.267236	-1.08095	3.90105	1.6153	2.91912	4.99532	2.91912	4	6.62108	0.0850077	1.23088	0.267236	49.1102	1.96503
Legend here
pval threshold	0.00208333
